# Supplementary material
Source: publisher figshare collection journal article supplement (https://acs.figshare.com/ndownloader/files/4602670)

# Supporting Information

## An Unexpected Diethyl Azodicarboxylate-promoted Dehydrogenation of Tertiaryamine and Tandem Reaction with Sulfonyl Azide

Xiaoliang Xu,<sup>†</sup> Xiaonian Li,<sup>\*,†</sup> Lei Ma,<sup>†</sup> Ning Ye,<sup>†</sup> and Bojie Weng<sup>‡</sup>

College of Chemical Engineering and Materials Science and College of Pharmaceutical Science, Zhejiang University of Technology, Hangzhou 310014, People's Republic of China  
Email: xnli@zjut.edu.cn

### Contents:

### Pages

Experimental section

S2

Synthesis and characterization of all products

S2-S13

<sup>1</sup>H and <sup>13</sup>C NMR spectra of all products

S14-S65

## Experimental Section

All reactions were carried out using standard Schlenk techniques. DMSO, DMF,  $\text{ClCH}_2\text{CH}_2\text{Cl}$ ,  $\text{CH}_2\text{Cl}_2$  and  $\text{CH}_3\text{CN}$  were distilled from  $\text{CaH}_2$ .  $\text{Et}_3\text{N}$ , THF, hexane, 1,4-dioxane, and toluene was distilled from sodium/benzophenone. Substituted sulfonyl azides were prepared according to literature.<sup>1</sup> Diphenylphosphoryl azide was prepared from diphenylphosphorochloridate and  $\text{NaN}_3$ .<sup>2</sup> *N,N*-diethyl-3-methylaniline was prepared from 3-methylaniline and ethyl phosphate.<sup>3</sup> Benzyloxycarbonyl azide was prepared from benzyl chloroformate and  $\text{NaN}_3$ .<sup>4</sup> *N,N*-dimethylethylamine, tri-*n*-butylamine, tri-*n*-hexylamine, *N*-ethylmorpholine, *N*-ethyl-*N*-benzylaniline, and *N,N*-diethylaniline were purchased from Sigma-Aldrich company.  $^1\text{H}$  and  $^{13}\text{C}$  NMR spectra were recorded at room temperature in  $\text{CDCl}_3$  on Bruker AMX-500 MHz instrument with TMS as internal standard. Coupling constants are reported in Hertz (Hz). IR spectra were taken as neat. Low-resolution MS was obtained using EI or ESI ionization. HRMS was obtained using ESI ionization. Elemental analyses were performed on a EA-1110 instrument. Melting points were measured with micro melting point apparatus and are uncorrected.

Caution: Azides and diazoalkanes may be hazardous and/or explosive.

Procedure for the synthesis of **3a**: To a 10 mL two-necked round-bottom flask with a mixture of *p*-toluenesulfonyl azide (0.197 g, 1 mmol) and DEAD (0.157 mL, 1 mmol) in anhydrous 1,4-dioxane (3 mL), was added triethylamine (0.14 mL, 1 mmol). The resulting mixture was stirred for 1 hour at 10-15°C, then at ambient temperature (about 25-30°C) for 4 h. Then the mixture was evaporated to almost dryness under reduced pressure. Purification was done by column chromatography on silica gel (200-300 mesh) with petroleum ether/ethyl acetate (3:1-1:1) as eluent to give the crude product. Then the second column chromatography on silica gel (200-300 mesh) was used to remove a little amount of 2H-DEAD with diethyl ether/petroleum ether (2:1-5:1) as eluent to give the pure product **3a**. 0.193 g, 76% yield.

m.p. 77-78 °C (lit.<sup>5</sup> 55-60°C);  $^1\text{H}$  NMR (500 MHz,  $\text{CDCl}_3$ )  $\delta$ = 1.12-1.15 (t,  $J$  = 7.3 Hz, 3H), 1.24-1.27 (t,  $J$  = 7.3 Hz, 3H), 2.40 (s, 3H), 3.35-3.40 (q,  $J$  = 7.2 Hz, 2H), 3.45-3.49 (q,  $J$  = 7.2 Hz, 2H), 7.25-7.26 (d,  $J$  = 8.0, 2H), 7.75-7.78 (m, 2H), 8.14 (s, 1H);  $^{13}\text{C}$  NMR (125 MHz,  $\text{CDCl}_3$ )  $\delta$ = 12.1, 14.5, 21.45, 40.9, 47.0, 126.4, 129.3, 139.8, 142.3, 158.1; IR (neat):  $\nu$ =2984, 1606, 1450, 1381, 1293, 1142, 1079, 872, 671  $\text{cm}^{-1}$ ; MS (EI, 70 eV):  $m/z$  (%): 254 (11) [ $M^+$ ], 161 (43), 155 (14), 99 (97), 72 (100).

Procedure for the synthesis of **3b**: To a 10 mL two-necked round-bottom flask with a mixture of 2, 4, 6-trimethylbenzenesulfonyl azide (0.225 g, 1 mmol) and DEAD (0.157 mL, 1 mmol) in anhydrous 1,4-dioxane (3 mL), was added triethylamine (0.14 mL, 1 mmol). The resulting mixture was stirred for 1 h at 10-15°C, then at ambient temperature (about 25-30°C) for 4 h. Then the mixture was evaporated to almost dryness under reduced pressure. Purification was done by column chromatography on silica gel

(200-300 mesh) with petroleum ether/ethyl acetate (3:1-1:1) as eluent to give the crude product. Then the second column chromatography on silica gel (200-300 mesh) was used to remove a little amount of 2H-DEAD with petroleum ether/acetone (5:1-3:1) as eluent to give the pure product **3b**. 0.20 g, 71% yield.

m.p. 81-82 °C;  $^1\text{H}$  NMR (500 MHz,  $\text{CDCl}_3$ )  $\delta$ = 1.12-1.15 (t,  $J$  = 7.3 Hz, 3H), 1.22-1.25 (t,  $J$  = 7.3 Hz, 3H), 2.27 (s, 3H), 2.68 (s, 6H), 3.33-3.37 (q,  $J$  = 7.2 Hz, 2H), 3.42-3.47 (q,  $J$  = 7.2 Hz, 2H), 6.90 (s, 2H), 8.12 (s, 1H);  $^{13}\text{C}$  NMR (125 MHz,  $\text{CDCl}_3$ )  $\delta$ = 12.0, 14.5, 20.9, 22.9, 40.8, 46.8, 131.4, 136.6, 138.3, 141.1, 157.4; IR (neat):  $\nu$ =2972, 1609, 1445, 1345, 1291, 1134, 863, 668  $\text{cm}^{-1}$ ; MS (EI, 70 eV):  $m/z$  (%): 282 (79) [ $M^+$ ], 210 (21), 146 (47), 119 (63), 72 (93), 58 (100); Anal.  $\text{C}_{12}\text{H}_{18}\text{N}_2\text{O}_2\text{S}$  Calcd. C, 59.54; H, 7.85; N, 9.92. found C, 59.58; H, 7.73; N, 9.88%.

Procedure for the synthesis of **3c**: To a 10 mL two-necked round-bottom flask with a mixture of benzenesulfonyl azide (0.183 g, 1 mmol) and DEAD (0.157 mL, 1 mmol) in anhydrous 1,4-dioxane (3 mL), was added triethylamine (0.14 mL, 1 mmol). The resulting mixture was stirred for 1 h at 10-15°C, then at ambient temperature (about 25-30°C) for 4 h. Then the mixture was evaporated to almost dryness under reduced pressure. Purification was done by column chromatography on silica gel (200-300 mesh) with petroleum ether/ethyl acetate (3:1-1:1) as eluent to give the crude product. Then the second column chromatography on silica gel (200-300 mesh) was used to remove a little amount of 2H-DEAD with diethyl ether/petroleum ether (2:1-5:1) as eluent to give the pure product **3c**. 0.154 g, 64% yield.

m.p. 73-75°C (lit.<sup>6</sup> 79-80°C);  $^1\text{H}$  NMR (500 MHz,  $\text{CDCl}_3$ )  $\delta$ = 1.13-1.16 (t,  $J$  = 7.3 Hz, 3H), 1.24-1.27 (t,  $J$  = 7.25 Hz, 3H), 3.36-3.41 (q,  $J$  = 7.2 Hz, 2H), 3.46-3.50 (q,  $J$  = 7.2 Hz, 2H), 7.44-7.52 (m, 3H), 7.88-7.89 (m, 2H), 8.16 (s, 1H);  $^{13}\text{C}$  NMR (125 MHz,  $\text{CDCl}_3$ )  $\delta$ = 12.1, 14.5, 41.0, 47.1, 126.3, 128.7, 131.7, 142.7, 158.2; IR (neat):  $\nu$ =2974, 1605, 1448, 1383, 1341, 1145, 1079, 873, 793, 670  $\text{cm}^{-1}$ ; MS (EI, 70 eV):  $m/z$  (%): 240 (11) [ $M^+$ ], 147 (36), 141 (18), 99 (100), 93 (6), 77 (92), 72 (88).

Procedure for the synthesis of **3d**: To a 10 mL two-necked round-bottom flask with a mixture of 2-phthanylsulfonyl azide (0.233 g, 1 mmol) and DEAD (0.157 mL, 1 mmol) in anhydrous 1,4-dioxane (3 mL), was added triethylamine (0.14 mL, 1 mmol). The resulting mixture was stirred for 1 h at 10-15°C, then at ambient temperature (about 25-30°C) for 4 h. Then the mixture was evaporated to almost dryness under reduced pressure. Purification was done by column chromatography on silica gel (200-300 mesh) with petroleum ether/ethyl acetate (3:1-1:1) as eluent to give the crude product. Then the second column chromatography on silica gel (200-300 mesh) was used to remove a little amount of 2H-DEAD with diethyl ether/petroleum ether (2:1-5:1) as eluent to give the pure product **3d**. 0.211 g, 73% yield.

m.p. 103-104 °C;  $^1\text{H}$  NMR (500 MHz,  $\text{CDCl}_3$ )  $\delta$ = 1.11-1.13 (t,  $J$  = 7.3 Hz, 3H), 1.22-1.25 (t,  $J$  = 7.3 Hz, 3H), 3.35-3.39 (q,  $J$  = 7.2 Hz, 2H), 3.45-3.49 (q,  $J$  = 7.2 Hz, 2H), 7.55-7.60 (m, 2H), 7.85-7.87 (m, 2H),

7.90-7.94 (m, 2H), 8.21 (s, 1H), 8.47 (s, 1H);  $^{13}\text{C}$  NMR (125 MHz,  $\text{CDCl}_3$ )  $\delta$ = 12.1, 14.5, 41.0, 47.1, 122.5, 126.9, 127.2, 127.8, 128.2, 128.9, 129.2, 132.2, 134.5, 139.6, 158.2; IR (neat): $\nu$ =2978, 1600, 1447, 1296, 1145, 874, 665  $\text{cm}^{-1}$ ; MS (EI, 70 eV):  $m/z$  (%): 290 (26) [ $M^+$ ], 197 (35), 127 (100), 99 (77), 72 (56); Anal.  $\text{C}_{15}\text{H}_{18}\text{N}_2\text{O}_2\text{S}$  Calcd. C, 62.04; H, 6.25; N, 9.65. found C, 62.11; H, 6.21; N, 9.58%.

Procedure for the synthesis of **3e**: To a 10 mL two-necked round-bottom flask with a mixture of 2-methoxycarbonylbenzenesulfonyl azide (0.241 g, 1 mmol) and DEAD (0.157 mL, 1 mmol) in anhydrous 1,4-dioxane (3 mL), was added triethylamine (0.14 mL, 1 mmol). The resulting mixture was stirred for 1 h at 10-15°C, then at ambient temperature (about 25-30°C) for 4 h. Then the mixture was evaporated to almost dryness under reduced pressure. Purification was done by column chromatography on silica gel (200-300 mesh) with petroleum ether/ethyl acetate (3:1-1:1) as eluent to give the crude product. Then the second column chromatography on silica gel (200-300 mesh) was used to remove a little amount of 2H-DEAD with diethyl ether/petroleum ether (2:1-5:1) as eluent to give the pure product **3e**. 0.215 g, 72% yield.

m.p. 106-107 °C;  $^1\text{H}$  NMR (500 MHz,  $\text{CDCl}_3$ )  $\delta$ = 1.13-1.16 (t,  $J$  = 7.3 Hz, 3H), 1.28-1.31 (t,  $J$  = 7.3 Hz, 3H), 3.40-3.44 (q,  $J$  = 7.2 Hz, 2H), 3.45-3.49 (q,  $J$  = 7.2 Hz, 2H), 3.93 (s, 3H), 7.51-7.58(m, 3H), 8.11 (s,1H), 8.13-8.15 (m, 1H);  $^{13}\text{C}$  NMR (125 MHz,  $\text{CDCl}_3$ )  $\delta$ = 12.0, 14.4, 41.0, 47.1, 52.8, 128.6, 129.0, 130.5, 131.51, 131.54, 140.4, 159.8, 168.3; IR (neat): $\nu$ =2986, 1732, 1605, 1450, 1288, 1155, 1118, 880, 653  $\text{cm}^{-1}$ ; MS (EI, 70 eV):  $m/z$  (%): 298 (5) [ $M^+$ ], 267 (16), 199 (27), 147 (34), 99 (100), 72 (89); Anal.  $\text{C}_{13}\text{H}_{18}\text{N}_2\text{O}_4\text{S}$  Calcd. C, 52.33; H, 6.08; N, 9.39. found C, 52.41; H, 6.23; N, 9.18%.

Procedure for the synthesis of **3f**: To a 10 mL two-necked round-bottom flask with a mixture of 4-isopropylbenzenesulfonyl azide (0.225 g, 1 mmol) and DEAD (0.157 mL, 1 mmol) in anhydrous 1,4-dioxane (3 mL), was added triethylamine (0.14 mL, 1 mmol). The resulting mixture was stirred for 1 h at 10-15°C, then at ambient temperature (about 25-30°C) for 4 h. Then the mixture was evaporated to almost dryness under reduced pressure. Purification was done by column chromatography on silica gel (200-300 mesh) with petroleum ether/ethyl acetate (3:1-1:1) as eluent to give the crude product. Then the second column chromatography on silica gel (200-300 mesh) was used to remove a little amount of 2H-DEAD with diethyl ether/petroleum ether (2:1-5:1) as eluent to give the pure product **3f**. 0.205 g, 73% yield.

m.p. 60 °C;  $^1\text{H}$  NMR (500 MHz,  $\text{CDCl}_3$ )  $\delta$ = 1.14-1.16 (t,  $J$  = 7.3 Hz, 3H), 1.24-1.27 (m, 9H), 2.92-2.98 (m, 1H), 3.36-3.40 (q,  $J$  = 7.2 Hz, 2H), 3.46-3.50 (q,  $J$  = 7.2 Hz, 2H), 7.28-7.31 (m, 2H), 7.78-7.81 (m, 2H), 8.16 (s, 1H);  $^{13}\text{C}$  NMR (125 MHz,  $\text{CDCl}_3$ )  $\delta$ = 12.1, 14.5, 23.7, 34.1, 40.9, 47.0, 126.4, 126.7, 140.1, 153.0, 158.1; IR (neat): $\nu$ =2963, 1611, 1447, 1346, 1270, 1137, 1083, 876, 659  $\text{cm}^{-1}$ ; MS (EI, 70 eV):  $m/z$

(%): 282 (6) [ $M^+$ ], 189 (15), 149 (14), 99 (43), 69 (100); Anal.  $C_{14}H_{22}N_2O_2S$  Calcd. C, 59.54; H, 7.85; N, 9.92. found C, 59.42; H, 7.93; N, 9.96%.

Procedure for the synthesis of **3g**: To a 10 mL two-necked round-bottom flask with a mixture of 4-chlorobenzenesulfonyl azide (0.218 g, 1 mmol) and DEAD (0.157 mL, 1 mmol) in anhydrous 1,4-dioxane (3 mL), was added triethylamine (0.14 mL, 1 mmol). The resulting mixture was stirred for 1 h at 10-15°C, then at ambient temperature (about 25-30°C) for 4 h. Then the mixture was evaporated to almost dryness under reduced pressure. Purification was done by column chromatography on silica gel (200-300 mesh) with petroleum ether/ethyl acetate (3:1-1:1) as eluent to give the crude product. Then the second column chromatography on silica gel (200-300 mesh) was used to remove a little amount of 2H-DEAD with diethyl ether/petroleum ether (2:1-5:1) as eluent to give the pure product **3g**. 0.195 g, 71% yield.

m.p. 90-91 °C;  $^1H$  NMR (500 MHz,  $CDCl_3$ )  $\delta$ = 1.13-1.16 (t,  $J$  = 7.3 Hz, 3H), 1.25-1.28 (t,  $J$  = 7.3 Hz, 3H), 3.37-3.42 (q,  $J$  = 7.2 Hz, 2H), 3.46-3.50 (q,  $J$  = 7.3 Hz, 2H), 7.42-7.44 (m, 2H), 7.80-7.84 (m, 2H), 8.14 (s, 1H);  $^{13}C$  NMR (125 MHz,  $CDCl_3$ )  $\delta$ = 12.1, 14.5, 41.1, 47.2, 127.9, 128.9, 138.0, 141.2, 158.1; IR (neat):  $\nu$ =2977, 1614, 1447, 1343, 1299, 1151, 1083, 954, 879, 633  $cm^{-1}$ ; MS (EI, 70 eV):  $m/z$  (%): 274 (10) [ $M^+$ ], 276 (4), 181 (23), 111 (57), 99 (100), 72 (95); Anal.  $C_{11}H_{15}ClN_2O_2S$  Calcd. C, 48.08; H, 5.50; N, 10.20. found C, 48.09; H, 5.40; N, 10.31%.

Procedure for the synthesis of **3h**: To a 10 mL two-necked round-bottom flask with a mixture of 4-methoxybenzenesulfonyl azide (0.213 g, 1 mmol) and DEAD (0.157 mL, 1 mmol) in anhydrous 1,4-dioxane (3 mL), was added triethylamine (0.14 mL, 1 mmol). The resulting mixture was stirred for 1 h at 10-15°C, then at ambient temperature (about 25-30°C) for 4 h. Then the mixture was evaporated to almost dryness under reduced pressure. Purification was done by column chromatography on silica gel (200-300 mesh) with petroleum ether/ethyl acetate (3:1-1:2) as eluent to give the purified product **3h**. 0.178 g, 66% yield.

m.p. 72-73 °C;  $^1H$  NMR (500 MHz,  $CDCl_3$ )  $\delta$ = 1.12-1.15 (t,  $J$  = 7.3 Hz, 3H), 1.24-1.27 (t,  $J$  = 7.3 Hz, 3H), 3.35-3.40 (q,  $J$  = 7.2 Hz, 2H), 3.44-3.49 (q,  $J$  = 7.2 Hz, 2H), 3.84 (s, 3H), 6.92-6.95 (m, 2H), 7.80-7.82 (m, 2H), 8.14 (s, 1H);  $^{13}C$  NMR (125 MHz,  $CDCl_3$ )  $\delta$ = 12.1, 14.5, 40.9, 47.0, 55.5, 113.8, 128.3, 134.6, 157.9, 162.2; IR (neat):  $\nu$ =2945, 1606, 1455, 1377, 1291, 1255, 1136, 876, 671  $cm^{-1}$ ; MS (EI, 70 eV):  $m/z$  (%): 270 (26) [ $M^+$ ], 177 (29), 171 (26), 99 (100), 73 (57); Anal.  $C_{12}H_{18}N_2O_3S$  Calcd. C, 53.31; H, 6.71; N, 10.36. found C, 53.48; H, 6.51; N, 10.35%.

Procedure for the synthesis of **3i**: To a 10 mL two-necked round-bottom flask with a mixture of 3-nitrobenzenesulfonyl azide (0.228 g, 1 mmol) and DEAD (0.157 mL, 1 mmol) in anhydrous 1,4-dioxane

(3 mL), was added triethylamine (0.14 mL, 1 mmol). The resulting mixture was stirred for 1 h at 10-15°C, then at ambient temperature (about 25-30°C) for 4 h. Then the mixture was evaporated to almost dryness under reduced pressure. Purification was done by column chromatography on silica gel (200-300 mesh) with petroleum ether/ethyl acetate (3:1-1:1) as eluent to give the crude product. Then the second column chromatography on silica gel (200-300 mesh) was used to remove a little amount of 2H-DEAD with diethyl ether/petroleum ether (2:1-5:1) as eluent to give the pure product **3i**. 0.185 g, 65% yield.

m.p. 53 °C; <sup>1</sup>H NMR (500 MHz, CDCl<sub>3</sub>) δ= 1.16-1.19 (t, *J* = 7.3 Hz, 3H), 1.29-1.32 (t, *J* = 7.3 Hz, 3H), 3.43-3.47 (q, *J* = 7.2 Hz, 2H), 3.49-3.53 (q, *J* = 7.2 Hz, 2H), 7.68-7.71 (t, *J* = 8.0 Hz, 1H), 8.19 (s, 1H), 8.23-8.25 (d, *J* = 7.5 Hz, 1H), 8.35-8.37 (m, 1H), 8.71 (d, *J* = 1.5 Hz, 1H); <sup>13</sup>C NMR (125 MHz, CDCl<sub>3</sub>) δ= 12.1, 14.4, 41.3, 47.4, 121.7, 126.3, 130.1, 132.2, 144.8, 148.0, 158.4; IR (neat): ν=2979, 1603, 1525, 1385, 1155, 1115, 885, 869, 664 cm<sup>-1</sup>; MS (EI, 70 eV): *m/z* (%): 285 (9) [*M*<sup>+</sup>], 192 (27), 122 (21), 99 (100), 72 (88); Anal. C<sub>11</sub>H<sub>15</sub>N<sub>3</sub>O<sub>4</sub>S Calcd. C, 46.31; H, 5.30; N, 14.73. found C, 46.48; H, 5.10; N, 14.76%.

Procedure for the synthesis of **3j**: To a 10 mL two-necked round-bottom flask with a mixture of 2-thienylsulfonyl azide (0.189 g, 1 mmol) and DEAD (0.157 mL, 1 mmol) in anhydrous 1,4-dioxane (3 mL), was added triethylamine (0.14 mL, 1 mmol). The resulting mixture was stirred for 1 h at 10-15°C, then at ambient temperature (about 25-30°C) for 4 h. Then the mixture was evaporated to almost dryness under reduced pressure. Purification was done by column chromatography on silica gel (200-300 mesh) with petroleum ether/ethyl acetate (3:1-1:1) as eluent to give the crude product. Then the second column chromatography on silica gel (200-300 mesh) was used to remove a little amount of 2H-DEAD with diethyl ether/petroleum ether (2:1-5:1) as eluent to give the pure product **3j**. 0.153 g, 62% yield.

m.p. 59-60 °C; <sup>1</sup>H NMR (500 MHz, CDCl<sub>3</sub>) δ= 1.16-1.19 (t, *J* = 7.3 Hz, 3H), 1.26-1.29 (t, *J* = 7.3 Hz, 3H), 3.38-3.42 (q, *J* = 7.2 Hz, 2H), 3.48-3.52 (q, *J* = 7.2 Hz, 2H), 7.02-7.03 (q, *J* = 2.8 Hz, 1H), 7.49-7.50 (q, *J* = 2.0 Hz, 1H), 7.58-7.59 (q, *J* = 1.7 Hz, 1H), 8.15 (s, 1H); <sup>13</sup>C NMR (125 MHz, CDCl<sub>3</sub>) δ= 12.1, 14.5, 41.2, 47.3, 126.9, 130.3, 130.5, 144.3, 158.3; IR (neat): ν=2969, 1616, 1449, 1337, 1290, 1135, 885, 742, 671 cm<sup>-1</sup>; MS (EI, 70 eV): *m/z* (%): 246 (15) [*M*<sup>+</sup>], 147 (33), 99 (100), 72 (86); Anal. C<sub>9</sub>H<sub>14</sub>N<sub>2</sub>O<sub>2</sub>S<sub>2</sub> Calcd. C, 43.88; H, 5.73; N, 11.37. found C, 43.98; H, 5.47; N, 11.34%.

Procedure for the synthesis of **3k**: To a 10 mL two-necked round-bottom flask with a mixture of 4-methylbenzylsulfonyl azide (0.211 g, 1 mmol) and DEAD (0.157 mL, 1 mmol) in anhydrous 1,4-dioxane (3 mL), was added triethylamine (0.14 mL, 1 mmol). The resulting mixture was stirred for 1 h at 10-15°C, then at ambient temperature (about 25-30°C) for 4 h. Then the mixture was evaporated to almost dryness under reduced pressure. Purification was done by column chromatography on silica gel (200-300 mesh)

with petroleum ether/ethyl acetate (3:1-1:1) as eluent to give the crude product. Then the second column chromatography on silica gel (200-300 mesh) was used to remove a little amount of 2H-DEAD with diethyl ether/petroleum ether (2:1-5:1) as eluent to give the pure product **3k**. 0.209 g, 78% yield.

m.p. 84-85 °C;  $^1\text{H}$  NMR (500 MHz,  $\text{CDCl}_3$ )  $\delta$ = 1.04-1.07 (t,  $J$  = 7.3 Hz, 3H), 1.15-1.18 (t,  $J$  = 7.3 Hz, 3H), 2.33 (s, 3H), 3.13-3.15 (q,  $J$  = 7.2 Hz, 2H), 3.41-3.44 (q,  $J$  = 7.2 Hz, 2H), 4.23 (s, 2H), 7.12-7.14 (d,  $J$  = 8.0 Hz, 2H), 7.22-7.23 (d,  $J$  = 8.0 Hz, 2H), 7.43 (s, 1H);  $^{13}\text{C}$  NMR (125 MHz,  $\text{CDCl}_3$ )  $\delta$ = 12.0, 14.4, 21.2, 40.8, 46.8, 59.3, 127.3, 129.1, 130.8, 138.1, 159.5; IR (neat):  $\nu$ =2969, 1606, 1451, 1340, 1295, 1114, 952, 900, 705  $\text{cm}^{-1}$ ; MS (EI, 70 eV):  $m/z$  (%): 268 (21) [ $M^+$ ], 204 (93), 175 (41), 105 (100), 99 (77), 77 (64), 72 (82); Anal.  $\text{C}_{13}\text{H}_{20}\text{N}_2\text{O}_2\text{S}$  Calcd. C, 58.18; H, 7.51; N, 10.44. found C, 58.29; H, 7.53; N, 10.35%.

Procedure for the synthesis of **3l**: To a 10 mL two-necked round-bottom flask with a mixture of *n*-butylsulfonyl azide (0.163 g, 1 mmol) and DEAD (0.157 mL, 1 mmol) in anhydrous 1,4-dioxane (3 mL), was added triethylamine (0.14 mL, 1 mmol). The resulting mixture was stirred for 1 h at 10-15°C, then at ambient temperature (about 25-30°C) for 4 h. Then the mixture was evaporated to almost dryness under reduced pressure. Purification was done by column chromatography on silica gel (200-300 mesh) with petroleum ether/ethyl acetate (3:1-1:1) as eluent to give the crude product. Then the second column chromatography on silica gel (200-300 mesh) was used to remove a little amount of 2H-DEAD with diethyl ether/petroleum ether (2:1-5:1) as eluent to give the pure product **3l**. 0.2 g, 91% yield.

light yellow oil;  $^1\text{H}$  NMR (500 MHz,  $\text{CDCl}_3$ )  $\delta$ = 0.92-0.95 (t,  $J$  = 7.5 Hz, 3H), 1.19-1.22 (t,  $J$  = 7.3 Hz, 3H), 1.26-1.29 (t,  $J$  = 7.3 Hz, 3H), 1.42-1.48 (m, 2H), 1.73-1.79 (m, 2H), 3.00-3.03 (m, 2H), 3.37-3.42 (q,  $J$  = 7.2 Hz, 2H), 3.48-3.52 (q,  $J$  = 7.2 Hz, 2H), 8.04 (s, 1H);  $^{13}\text{C}$  NMR (125 MHz,  $\text{CDCl}_3$ )  $\delta$ = 11.9, 13.6, 14.5, 21.5, 25.7, 40.8, 47.0, 53.6, 158.3; IR (neat):  $\nu$ =2962, 2874, 1606, 1452, 1346, 1267, 1121, 872, 613  $\text{cm}^{-1}$ ; MS (EI, 70 eV):  $m/z$  (%): 220 (19) [ $M^+$ ], 163 (17), 99 (91), 72 (100); HRMS (ESI) calcd for  $\text{C}_9\text{H}_{20}\text{N}_2\text{O}_2\text{S}$  ([ $M+\text{Na}$ ] $^+$ ) 243.1138, found 243.1130.

Procedure for the synthesis of **3m**: To a 10 mL two-necked round-bottom flask with a mixture of *p*-toluenesulfonyl azide (0.197 g, 1 mmol) and DEAD (0.236 mL, 1.5 mmol) in anhydrous 1,4-dioxane (3 mL), was added dimethylethylamine (0.237 mL, 2.2 mmol). The resulting mixture was stirred for 1 h at 10-15°C, then at ambient temperature (about 25-30°C) for 4 h. Then the mixture was evaporated to almost dryness under reduced pressure. Purification was done by column chromatography on silica gel (200-300 mesh) with petroleum ether/ethyl acetate (3:1-1:1) as eluent to give the crude product. Then the second column chromatography on silica gel (200-300 mesh) was used to remove a little amount of 2H-DEAD with diethyl ether/petroleum ether (2:1-5:1) as eluent to give the pure product **3m**. 0.104 g, 46% yield.

m.p. 132-133 °C (lit.<sup>7</sup> 136-137 °C); <sup>1</sup>H NMR (500 MHz, CDCl<sub>3</sub>) δ= 2.40 (s, 3H), 3.01 (s, 3H), 3.12 (s, 3H), 7.25-7.27 (d, *J* = 8.5 Hz, 2H), 7.76-7.78 (d, *J* = 8.0 Hz, 2H), 8.13 (s, 1H); <sup>13</sup>C NMR (125 MHz, CDCl<sub>3</sub>) δ= 21.5, 35.5, 41.4, 126.5, 129.3, 139.6, 142.4, 159.1; IR (neat):ν=1626, 1436, 1334, 1280, 1147, 1084, 912, 850, 672 cm<sup>-1</sup>; MS (EI, 70 eV): *m/z* (%): 226 (24) [*M*<sup>+</sup>], 91 (73), 71 (100).

Procedure for the synthesis of **3n**: To a 10 mL two-necked round-bottom flask with a mixture of *p*-toluenesulfonyl azide (0.197 g, 1 mmol) and DEAD (0.157 mL, 1 mmol) in anhydrous 1,4-dioxane (3 mL), was added tri-*n*-butylamine (0.238 mL, 1 mmol). The resulting mixture was stirred for 1 h at 10-15°C, then at ambient temperature (about 25-30°C) for 4 h. Then the mixture was evaporated to almost dryness under reduced pressure. Purification was done by column chromatography on silica gel (200-300 mesh) with petroleum ether/ethyl acetate (3:1-1:1) as eluent to give the crude product. Then the second column chromatography on silica gel (200-300 mesh) was used to remove a little amount of 2H-DEAD with petroleum ether/acetone (5:1-2:1) as eluent to give the pure product **3n**. 0.229 g, 74% yield.

viscous oil; <sup>1</sup>H NMR (500 MHz, CDCl<sub>3</sub>) δ= 0.84-0.87 (t, *J* = 7.3 Hz, 3H), 0.91-0.94 (t, *J* = 7.3 Hz, 3H), 1.24-1.31 (m, 4H), 1.49-1.52 (m, 2H), 1.55-1.58 (m, 2H), 2.38 (s, 3H), 3.28-3.31 (t, *J* = 7.3 Hz, 2H), 3.37-3.40 (t, *J* = 7.5 Hz, 2H), 7.24-7.25 (d, *J* = 8.0 Hz, 2H), 7.73-7.76 (m, 2H), 8.14 (s, 1H); <sup>13</sup>C NMR (125 MHz, CDCl<sub>3</sub>) δ= 13.4, 13.5, 19.4, 19.7, 21.3, 28.5, 30.5, 45.7, 52.1, 126.1, 129.0, 139.7, 142.0, 158.7; IR (neat):ν=2958, 2872, 1603, 1455, 1345, 1281, 1144, 1086, 671 cm<sup>-1</sup>; MS (EI, 70 eV): *m/z* (%): 310 (4) [*M*<sup>+</sup>], 267 (41), 155 (93), 113 (78), 91 (100); HRMS (ESI) calcd for C<sub>16</sub>H<sub>26</sub>N<sub>2</sub>O<sub>2</sub>S ([*M*+Na]<sup>+</sup>) 333.1607, found 333.1603.

Procedure for the synthesis of **3o**: To a 10 mL two-necked round-bottom flask with a mixture of *p*-toluenesulfonyl azide (0.197 g, 1 mmol) and DEAD (0.157 mL, 1 mmol) in anhydrous 1,4-dioxane (3 mL), was added tri-*n*-hexylamine (0.339 mL, 1 mmol). The resulting mixture was stirred for 1 h at 10-15°C, then at ambient temperature (about 25-30°C) for 4 h. Then the mixture was evaporated to almost dryness under reduced pressure. Purification was done by column chromatography on silica gel (200-300 mesh) with petroleum ether/ethyl acetate (3:1-1:1) as eluent to give the crude product. Then the second column chromatography on silica gel (200-300 mesh) was used to remove a little amount of 2H-DEAD with petroleum ether/acetone (5:1-2:1) as eluent to give the pure product **3o**. 0.231 g, 63% yield.

viscous oil; <sup>1</sup>H NMR (500 MHz, CDCl<sub>3</sub>) δ= 0.82-0.84 (t, *J* = 6.8 Hz, 3H), 0.87-0.90 (t, *J* = 7.5 Hz, 3H), 1.19-1.30 (m, 12H), 1.50-1.59 (m, 4H), 2.39 (s, 3H), 3.27-3.29 (t, *J* = 8.5 Hz, 2H), 3.37-3.40 (t, *J* = 8.5 Hz, 2H), 7.23-7.25 (d, *J* = 8.0 Hz, 2H), 7.73-7.76 (m, 3H), 8.13 (s, 1H); <sup>13</sup>C NMR (125 MHz, CDCl<sub>3</sub>) δ= 13.9, 21.4, 22.4, 22.4, 26.0, 26.3, 26.5, 28.6, 31.2, 31.3, 46.2, 52.5, 126.3, 129.2, 139.9, 142.1, 158.8; IR (neat):ν=2928, 2857, 1604, 1453, 1346, 1297, 1282, 1145, 1087, 672 cm<sup>-1</sup>; MS (EI, 70 eV): *m/z* (%): 366



(3) [ $M^+$ ], 295 (65), 211 (88), 155 (41), 141 (85), 91 (100); HRMS (ESI) calcd for  $C_{20}H_{34}N_2O_2S$  ( $[M+Na]^+$ ) 389.2233, found 389.2251.

Procedure for the synthesis of **3p**: To a 10 mL two-necked round-bottom flask with a mixture of *p*-toluenesulfonyl azide (0.197 g, 1 mmol) and DEAD (0.157 mL, 1 mmol) in anhydrous 1,4-dioxane (3 mL), was added *N,N*-diethylcyclohexylamine (0.183 mL, 1 mmol). The resulting mixture was stirred for 1 h at 10-15°C, then at ambient temperature (about 25-30°C) for 4 h. Then the mixture was evaporated to almost dryness under reduced pressure. Purification was done by column chromatography on silica gel (200-300 mesh) with petroleum ether/ethyl acetate (3:1-1:1) as eluent to give the crude product. Then the second column chromatography on silica gel (200-300 mesh) was used to remove a little amount of remained 2H-DEAD with petroleum ether/acetone (6:1-4:1) as eluent to give the pure product **3p**. 0.175 g, 57% yield.

m.p. 94-96 °C;  $^1H$  NMR (500 MHz,  $CDCl_3$ )  $\delta$ = 1.12-1.32 (m, 8H), 1.48-1.51 (m, 2.4H), 1.68-1.71 (m, 2.4H), 1.85-1.88 (m, 4H), 2.39 (s, 3.6H), 3.18-3.24 (m, 1H), 3.30-3.35 (q,  $J$  = 7.0 Hz, 0.4H), 3.41-3.45 (q,  $J$  = 7.0 Hz, 2H), 4.14-4.20 (m, 0.2H), 7.24-7.27 (m, 2.4H), 7.45-7.77 (m, 2.4H), 8.16 (s, 0.2H), 8.21 (s, 1H);  $^{13}C$  NMR (125 MHz,  $CDCl_3$ )  $\delta$ = 13.3, 17.0, 21.4, 25.0, 25.3, 25.4, 25.6, 30.0, 32.6, 40.6, 43.2, 56.2, 63.0, 126.29, 126.3, 129.2, 139.9, 140.0, 142.11, 142.14, 157.3, 158.6; MS (ESI): ( $[M+Na]^+$ ) 331.3; HRMS (ESI) calcd for  $C_{16}H_{24}N_2O_2S$  ( $[M]^+$ ) 308.1558, found 308.1562.

Procedure for the synthesis of **3q**: To a 10 mL two-necked round-bottom flask with a mixture of *p*-toluenesulfonyl azide (0.197 g, 1 mmol) and DEAD (0.471 mL, 3 mmol) was added *N,N*-diethylaniline (0.159 mL, 1 mmol). The resulting mixture was stirred for 6 h at 75°C. Purification was done by column chromatography on silica gel (200-300 mesh) with petroleum ether/ethyl acetate (3:1-1:1) as eluent to give the crude product. Then the second column chromatography on silica gel (200-300 mesh) was used to remove a little amount of 2H-DEAD with diethyl ether/petroleum ether (2:1-5:1) as eluent to give the pure product **3q**. 0.154 g, 51% yield.

m.p. 100-101 °C;  $^1H$  NMR (500 MHz,  $CDCl_3$ )  $\delta$ = 1.16-1.19 (t,  $J$  = 7.0 Hz, 3H), 2.41 (s, 3H), 3.95-3.99 (q,  $J$  = 6.7 Hz, 2H), 7.18-7.20 (d,  $J$  = 7.0 Hz, 2H), 7.28-7.29 (d,  $J$  = 7.5 Hz, 2H), 7.33-7.36 (t,  $J$  = 7.0 Hz, 1H), 7.42-7.45 (t,  $J$  = 7.0 Hz, 2H), 7.81-7.82 (d,  $J$  = 7.5 Hz, 2H), 8.45 (s, 1H);  $^{13}C$  NMR (125 MHz,  $CDCl_3$ )  $\delta$ = 12.4, 21.5, 44.1, 123.6, 126.6, 127.7, 129.4, 129.9, 139.2, 141.9, 142.7, 158.1; IR (neat):  $\nu$ =3084, 1609, 1534, 1436, 1349, 1292, 1106, 856, 664  $cm^{-1}$ ; MS (EI, 70 ev):  $m/z$  (%): 302 (15) [ $M^+$ ], 209 (18), 147 (100), 119 (41), 91 (73); Anal.  $C_{16}H_{18}N_2O_2S$  Calcd. C, 63.55; H, 6.00; N, 9.26. found C, 63.53; H, 6.03; N, 9.22%.

Procedure for the synthesis of **3r**: To a 10 mL two-necked round-bottom flask with a mixture of *p*-toluenesulfonyl azide (0.197 g, 1 mmol) and DEAD (0.471 mL, 3 mmol) was added *N,N*-diethyl-3-methylaniline (0.163 g, 1 mmol). The resulting mixture was stirred for 6 h at 75°C. Purification was done by column chromatography on silica gel (200-300 mesh) with petroleum ether/ethyl acetate (3:1-1:1) as eluent to give the crude product. Then the second column chromatography on silica gel (200-300 mesh) was used to remove a little amount of 2H-DEAD with diethyl ether/petroleum ether (2:1-5:1) as eluent to give the pure product **3r**. 0.066 g, 21% yield.

m.p. 53-54 °C; <sup>1</sup>H NMR (500 MHz, CDCl<sub>3</sub>) δ= 1.15-1.18 (t, *J* = 7.0 Hz, 3H), 2.39 (s, 3H), 2.41 (s, 3H), 3.93-3.97 (q, *J* = 7.0 Hz, 2H), 6.98-6.99 (d, *J* = 6.0 Hz, 2H), 7.14-7.16 (d, *J* = 8.0 Hz, 1H), 7.26-7.31 (m, 3H), 7.80-7.82 (d, *J* = 8.5 Hz, 2H), 8.44 (s, 1H); <sup>13</sup>C NMR (125 MHz, CDCl<sub>3</sub>) δ= 12.4, 21.3, 21.5, 44.0, 120.5, 124.2, 126.6, 128.4, 129.4, 129.6, 139.2, 140.1, 141.9, 142.6, 158.1; MS (ESI): ([M+Na]<sup>+</sup>) 339.1; HRMS (ESI) calcd for C<sub>17</sub>H<sub>20</sub>N<sub>2</sub>O<sub>2</sub>S ([M]<sup>+</sup>) 316.1245, found 316.1244.

Procedure for the synthesis of **3s**: To a 10 mL two-necked round-bottom flask with a mixture of *p*-toluenesulfonyl azide (0.197 g, 1 mmol) and DEAD (0.471 mL, 3 mmol) was added *N*-ethyl-*N*-benzylaniline (0.211 g, 1 mmol). The resulting mixture was stirred for 6 h at 75°C. Purification was done by column chromatography on silica gel (200-300 mesh) with petroleum ether/ethyl acetate (3:1-1:1) as eluent to give the crude product. Then the second column chromatography on silica gel (200-300 mesh) was used to remove a little amount of 2H-DEAD with petroleum ether/acetone (4:1-6:1) as eluent to give the pure product **3s**. 0.124 g, 34% yield.

m.p. 104-105 °C; <sup>1</sup>H NMR (500 MHz, CDCl<sub>3</sub>) δ= 2.42 (s, 3H), 5.11 (s, 2H), 7.10-7.14 (m, 4H), 7.14-7.21 (m, 3H), 7.25-7.30 (m, 3H), 7.33-7.37 (m, 2H), 7.75-7.77 (d, *J* = 8.5 Hz, 2H), 8.63 (s, 1H); <sup>13</sup>C NMR (125 MHz, CDCl<sub>3</sub>) δ= 21.5, 52.6, 123.5, 126.5, 127.7, 127.8, 127.9, 128.6, 129.3, 129.8, 135.1, 139.0, 142.1, 142.7, 158.7; MS (ESI): ([M+Na]<sup>+</sup>) 387.2; HRMS (ESI) calcd for C<sub>21</sub>H<sub>20</sub>N<sub>2</sub>O<sub>2</sub>S ([M]<sup>+</sup>) 364.1245, found 364.1248.

Procedure for the synthesis of **3t**: To a 10 mL two-necked round-bottom flask with a mixture of *p*-toluenesulfonyl azide (0.197 g, 1 mmol) and DEAD (0.314 mL, 2 mmol) in anhydrous 1,4-dioxane (3 mL), was added *N*-ethylmorpholine (0.254 mL, 2 mmol). The resulting mixture was stirred for 1 h at 10-15°C, then at ambient temperature (about 25-30°C) for 4 h. Then the mixture was evaporated to almost dryness under reduced pressure. Purification was done by column chromatography on silica gel (200-300 mesh) with petroleum ether/ethyl acetate (3:1-1:1) as eluent to give the crude product. Then the second column chromatography on silica gel (200-300 mesh) was used to remove a little amount of remained 2H-DEAD with diethyl ether/petroleum ether (2:1-5:1) as eluent to give the pure product **3t**. 0.219 g, 82% yield.

m.p. 176-177 °C (lit.<sup>8</sup> 169-170 °C); <sup>1</sup>H NMR (500 MHz, CDCl<sub>3</sub>) δ= 2.40 (s, 3H), 3.49-3.51 (t, *J* = 4.5 Hz, 2H), 3.67 (s, 4H), 3.73-3.75 (t, *J* = 4.5 Hz, 2H), 7.26-7.28 (d, *J* = 7.5 Hz, 2H), 7.76-7.77 (t, *J* = 8.0 Hz, 2H), 8.21 (s, 1H); <sup>13</sup>C NMR (125 MHz, CDCl<sub>3</sub>) δ= 21.5, 44.2, 50.3, 65.9, 66.8, 126.6, 129.4, 139.2, 142.7, 157.7; IR (neat): ν=2870, 1607, 1438, 1338, 1290, 1137, 1085, 852, 669 cm<sup>-1</sup>; MS (EI, 70 eV): *m/z* (%): 268 (14) [*M*<sup>+</sup>], 155 (11), 113 (100), 91 (70).

Procedure for the synthesis of **3u**: To a 10 mL two-necked round-bottom flask with a mixture of 2-phthanylsulfonyl azide (0.233 g, 1 mmol) and DEAD (0.314 mL, 2 mmol) in anhydrous 1,4-dioxane (3 mL), was added *N*-ethylmorpholine (0.254 mL, 2 mmol). The resulting mixture was stirred for 1 h at 10-15°C, then at ambient temperature (about 25-30°C) for 4 h. Then the mixture was evaporated to almost dryness under reduced pressure. Purification was done by column chromatography on silica gel (200-300 mesh) with petroleum ether/ethyl acetate (3:1-1:1) as eluent to give the crude product. Then the second column chromatography on silica gel (200-300 mesh) was used to remove a little amount of 2H-DEAD with diethyl ether/petroleum ether (2:1-5:1) as eluent to give the pure product **3u**. 0.240 g, 79% yield.

m.p. 202-203 °C; <sup>1</sup>H NMR (500 MHz, CDCl<sub>3</sub>) δ= 3.51 (s, 2H), 3.67 (s, 4H), 3.74 (s, 2H), 7.56-7.62 (m, 2H), 7.86-7.89 (m, 2H), 7.92-7.96 (m, 2H), 8.27 (s, 1H), 8.47 (s, 1H); <sup>13</sup>C NMR (125 MHz, CDCl<sub>3</sub>) δ= 44.3, 50.4, 65.9, 66.8, 122.5, 127.3, 127.3, 127.8, 128.4, 129.0, 129.2, 132.2, 134.6, 138.9, 157.8; IR (neat): ν=2913, 1609, 1438, 1340, 1293, 1144, 1109, 949, 858, 666 cm<sup>-1</sup>; MS (EI, 70 eV): *m/z* (%): 304 (37) [*M*<sup>+</sup>], 191 (5), 127 (100), 113 (79), 86 (43); Anal. C<sub>15</sub>H<sub>16</sub>N<sub>2</sub>O<sub>3</sub>S Calcd. C, 59.19; H, 5.30; N, 9.20. found C, 59.24; H, 5.25; N, 9.13%.

Procedure for the synthesis of **3v**: To a 10 mL two-necked round-bottom flask with a mixture of 3-nitrobenzenesulfonyl azide (0.228 g, 1 mmol) and DEAD (0.314 mL, 2 mmol) in anhydrous 1,4-dioxane (3 mL), was added *N*-ethylmorpholine (0.254 mL, 2 mmol). The resulting mixture was stirred for 1 h at 10-15°C, then at ambient temperature (about 25-30°C) for 4 h. Then the mixture was evaporated to almost dryness under reduced pressure. Purification was done by column chromatography on silica gel (200-300 mesh) with petroleum ether/ethyl acetate (3:1-1:1) as eluent to give the crude product. Then the second column chromatography on silica gel (200-300 mesh) was used to remove a little amount of 2H-DEAD with diethyl ether/petroleum ether (2:1-5:1) as eluent to give the pure product **3v**. 0.224 g, 75% yield.

m.p. 154-155 °C; <sup>1</sup>H NMR (500 MHz, CDCl<sub>3</sub>) δ= 3.57-3.59 (t, *J* = 4.8 Hz, 2H), 3.72 (s, 4H), 3.79-3.81 (t, *J* = 4.8 Hz, 2H), 7.69-7.72 (t, *J* = 8.0 Hz, 1H), 8.23-8.26 (m, 2H), 8.37-8.39 (d, *J* = 8.0 Hz, 1H), 8.69 (s, 1H); <sup>13</sup>C NMR (125 MHz, CDCl<sub>3</sub>) δ= 44.5, 50.6, 65.8, 66.8, 121.9, 126.5, 130.2, 132.3, 144.2, 148.1, 158.0; IR (neat): ν=2974, 1608, 1432, 1364, 1293, 1237, 1143, 1109, 860, 668 cm<sup>-1</sup>; MS (EI, 70 eV): *m/z*

(%): 299 (7) [ $M^+$ ], 186 (9), 113 (100), 86 (54); Anal.  $C_{11}H_{13}N_3O_5S$  Calcd. C, 44.14; H, 4.38; N, 14.04. found C, 44.21; H, 4.35; N, 14.10%.

Procedure for the synthesis of **3w**: To a 10 mL two-necked round-bottom flask with a mixture of diphenylphosphoryl azide (0.275 g, 1 mmol) and DEAD (0.471 mL, 3 mmol) was added triethylamine (0.42 mL, 3 mmol). The resulting mixture was stirred for 1 h at 10-15°C, then at ambient temperature (about 25-30°C) for 4 h. Then the mixture was evaporated to almost dryness under reduced pressure. Purification was done by column chromatography on silica gel (200-300 mesh) with petroleum ether/ethyl acetate (3:1-1:1) as eluent to give the crude product. Then the second column chromatography on silica gel (200-300 mesh) was used to remove a little amount of 2H-DEAD with diethyl ether/petroleum ether (2:1-3:1) as eluent to give the pure product **3w**. 0.140 g, 42% yield.

Viscous oil;  $^1H$  NMR (500 MHz,  $CDCl_3$ )  $\delta$ = 1.03-1.06 (t,  $J$  = 7.5 Hz, 3H), 1.15-1.17 (t,  $J$  = 8.0 Hz, 3H), 3.24-3.29 (q,  $J$  = 7.0 Hz, 2H), 3.40-3.44 (q,  $J$  = 7.0 Hz, 2H), 7.10-7.12 (m, 2H), 7.24-7.30 (m, 8H), 8.03, 8.07 (s, 1H);  $^{13}C$  NMR (125 MHz,  $CDCl_3$ )  $\delta$ = 11.9, 14.5, 39.7, 46.1, 120.66, 120.69, 124.4, 129.4, 151.4, 151.5, 159.95, 160.03; MS (ESI): ( $[M+H]^+$ ) 333.2; HRMS (ESI) calcd for  $C_{17}H_{21}N_2O_3P$  ( $[M]^+$ ) 332.1290, found 332.1294.

Procedure for the synthesis of **3x**: To a 10 mL two-necked round-bottom flask with a mixture of benzyloxycarbonyl azide (0.177 g, 1 mmol) and DEAD (0.471 mL, 3 mmol) was added triethylamine (0.42 mL, 3 mmol). The resulting mixture was stirred for 1 h at 10-15°C, then at ambient temperature (about 25-30°C) for 4 h. Then the mixture was evaporated to almost dryness under reduced pressure. Purification was done by column chromatography on silica gel (200-300 mesh) with petroleum ether/ethyl acetate (3:1-1:1) as eluent to give the crude product. Then the second column chromatography on silica gel (200-300 mesh) was used to remove a little amount of 2H-DEAD with diethyl ether/petroleum ether (1:1-3:1) as eluent to give the pure product **3x**. 0.035 g, 15% yield.

Viscous oil;  $^1H$  NMR (500 MHz,  $CDCl_3$ )  $\delta$ = 1.16-1.19 (t,  $J$  = 7.0 Hz, 3H), 1.23-1.25 (t,  $J$  = 8.0 Hz, 3H), 3.33-3.74 (q,  $J$  = 8.0 Hz, 2H), 3.53-3.57 (q,  $J$  = 7.0 Hz, 2H), 5.18 (s, 2H), 7.27-7.34 (m, 3H), 7.41-7.42 (d,  $J$  = 7.0 Hz, 2H), 8.48 (s, 1H);  $^{13}C$  NMR (125 MHz,  $CDCl_3$ )  $\delta$ = 12.2, 14.5, 40.4, 46.8, 67.4, 127.8, 128.3, 128.4, 136.9, 162.2, 164.7; MS (ESI): ( $[M+H]^+$ ) 235.1; HRMS (ESI) calcd for  $C_{13}H_{18}N_2O_2$  ( $[M]^+$ ) 234.1368, found 234.1360.

Procedure for the synthesis of **3y** and **3z**: To a 10 mL two-necked round-bottom flask with a mixture of *p*-toluenesulfonyl azide (0.197 g, 1 mmol) and DEAD (0.157 mL, 1 mmol) in anhydrous 1,4-dioxane (3 mL), was added *N*-ethylpiperidine (0.137 mL, 1 mmol). The resulting mixture was stirred for 6 h at

ambient temperature (about 25-30°C). Then the mixture was evaporated to almost dryness under reduced pressure. Purification was done by column chromatography on silica gel (200-300 mesh) with petroleum ether/ethyl acetate (3:1-1:1) as eluent to give the crude product. Then the second column chromatography on silica gel (200-300 mesh) was used to remove a little amount of 2H-DEAD with diethyl ether/petroleum ether (2:1-5:1) as eluent to give the pure product. **3y**: 0.135 g, 51%; **3z**: 0.04 g, 14% yield. **3y**: m.p. 147-149 °C (lit.<sup>8</sup> 150 °C); <sup>1</sup>H NMR (500 MHz, CDCl<sub>3</sub>) δ= 1.57-1.60 (m, 2H), 1.64-1.69 (m, 4H), 2.39 (s, 3H), 3.40-3.42 (t, *J* = 5.1 Hz, 2H), 3.58-3.60 (t, *J* = 5.8 Hz, 2H), 7.25-7.28 (t, *J* = 8.5 Hz, 2H), 7.75-7.78 (m, 2H), 8.12(s, 1H); <sup>13</sup>C NMR (125 MHz, CDCl<sub>3</sub>) δ= 21.5, 23.9, 24.8, 26.4, 44.6, 51.9, 126.5, 129.3, 139.7, 142.3, 157.3; IR (neat): ν=2944, 1604, 1444, 1357, 1293, 1145, 1085, 924, 873, 671 cm<sup>-1</sup>; MS (EI, 70 eV): *m/z* (%): 266 (7) [*M*<sup>+</sup>], 155 (3), 111 (96), 91 (42), 84 (100).

**3z**: m.p. 109-110 °C; <sup>1</sup>H NMR (500 MHz, CDCl<sub>3</sub>) δ= 1.12-1.15 (t, *J* = 7.0 Hz, 3H), 1.72-1.82 (m, 4H), 2.39 (s, 3H), 3.02-3.05 (t, *J* = 6.5 Hz, 2H), 3.32-3.34 (t, *J* = 6.0 Hz, 2H), 3.47-3.52 (q, *J* = 7.3 Hz, 2H), 7.24-7.25 (d, *J* = 8.0 Hz, 2H), 7.80-7.82 (d, *J* = 8.5 Hz, 2H); <sup>13</sup>C NMR (125 MHz, CDCl<sub>3</sub>) δ= 11.3, 19.6, 21.4, 22.3, 28.6, 45.5, 48.2, 126.2, 129.0, 141.5, 141.6, 165.2; IR (neat): ν=2872, 1562, 1470, 1444, 1269, 1135, 823, 697, 657 cm<sup>-1</sup>; MS (EI, 70 eV): *m/z* (%): 281 (6) [*M*<sup>+</sup>+1], 187 (9), 125 (82), 72 (57), 59 (100); Anal. C<sub>14</sub>H<sub>20</sub>N<sub>2</sub>O<sub>2</sub>S Calcd. C, 59.97; H, 7.19; N, 9.99. found C, 60.01; H, 7.20; N, 9.97%.

## Reference:

1. Regitz, M.; Hocker, J.; Liedhegener, A. *Org. Synth.* **1973**, *48*, 36.
2. Kim, S. H.; Jung, D. Y.; Chang, S. *J Org. Chem.* **2007**, *72*, 9769.
3. Billman, John H.; Radike, A.; Mundy, B. W. *J Am. Chem. Soc.* **1942**, *64*, 2977.
4. Carpino, L. A.; Cohen, B. J.; Lin, Y.; Stephens, K. E., Jr.; Triolo, S. A. *J. Org. Chem.* **1990**, *55*, 251.
5. Brook, P. R.; Brophy, B. V. *J. Chem. Soc. Perkin Trans. I* **1985**, 2509.
6. Mirskova, A. N.; Leskovskaya, G. G.; Bryuzgin, A. A.; Drozdova, T. I.; Kalikhman, I. D.; Voronkov, M. G. *Zh. Org. Khim.* **1990**, *26*, 140.
7. Arnsward, M.; Neumann, W. P. *J. Org. Chem.* **1993**, *58*, 7022.
8. Krasnov, V. L.; Vasyanina, G. I.; Bodrikov, I. V. *Zh. Org. Khim.* **1991**, *27*, 1552.

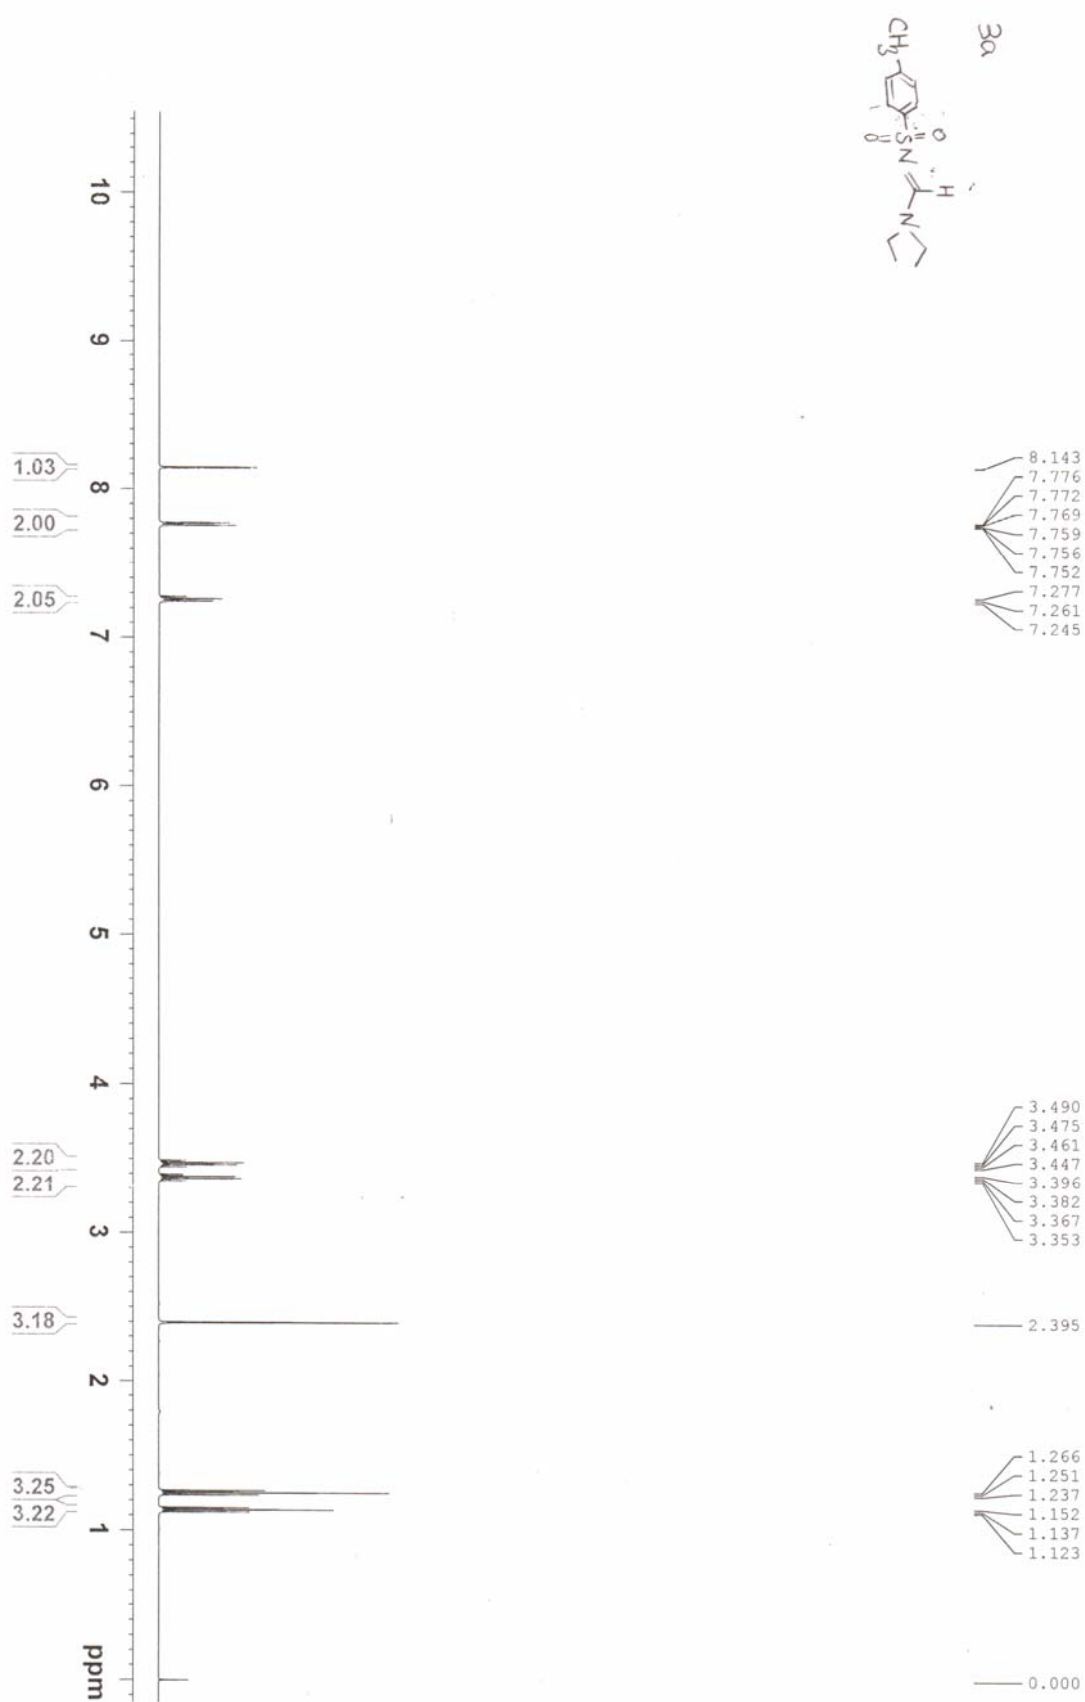

xx1-1 CDCl3

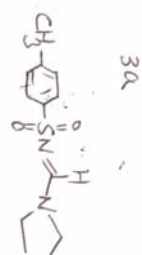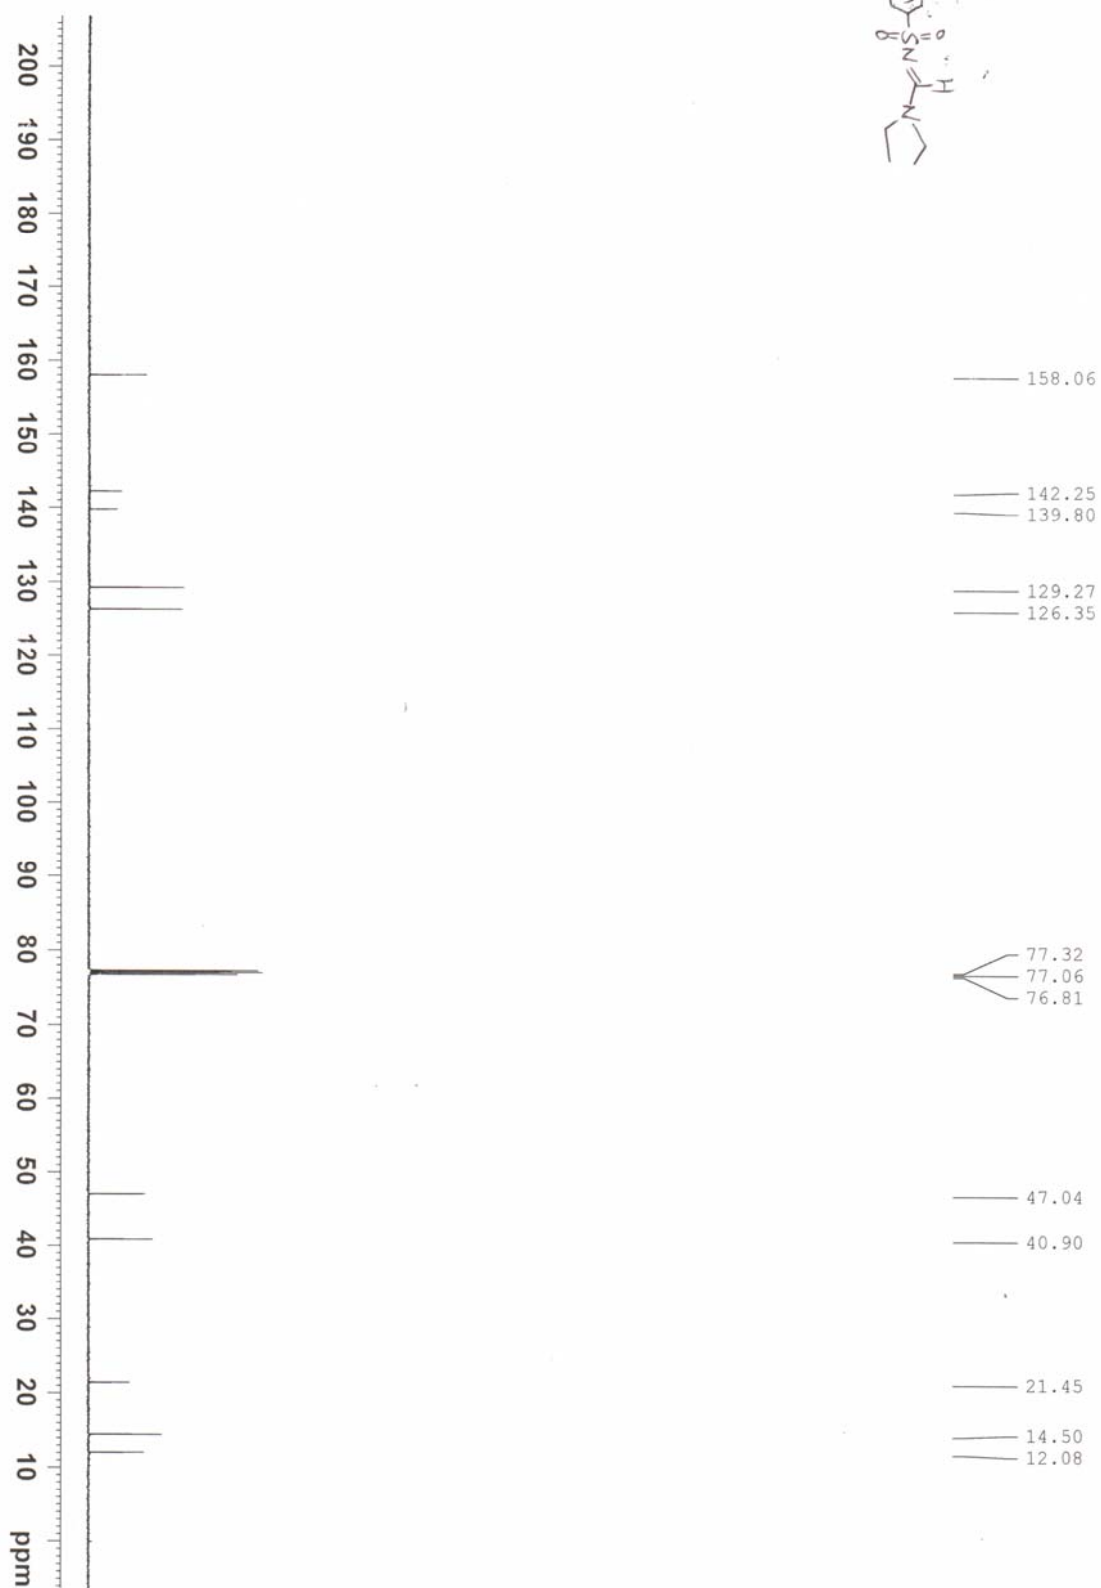

XX-15 CDCl<sub>3</sub>

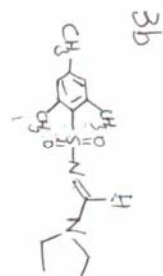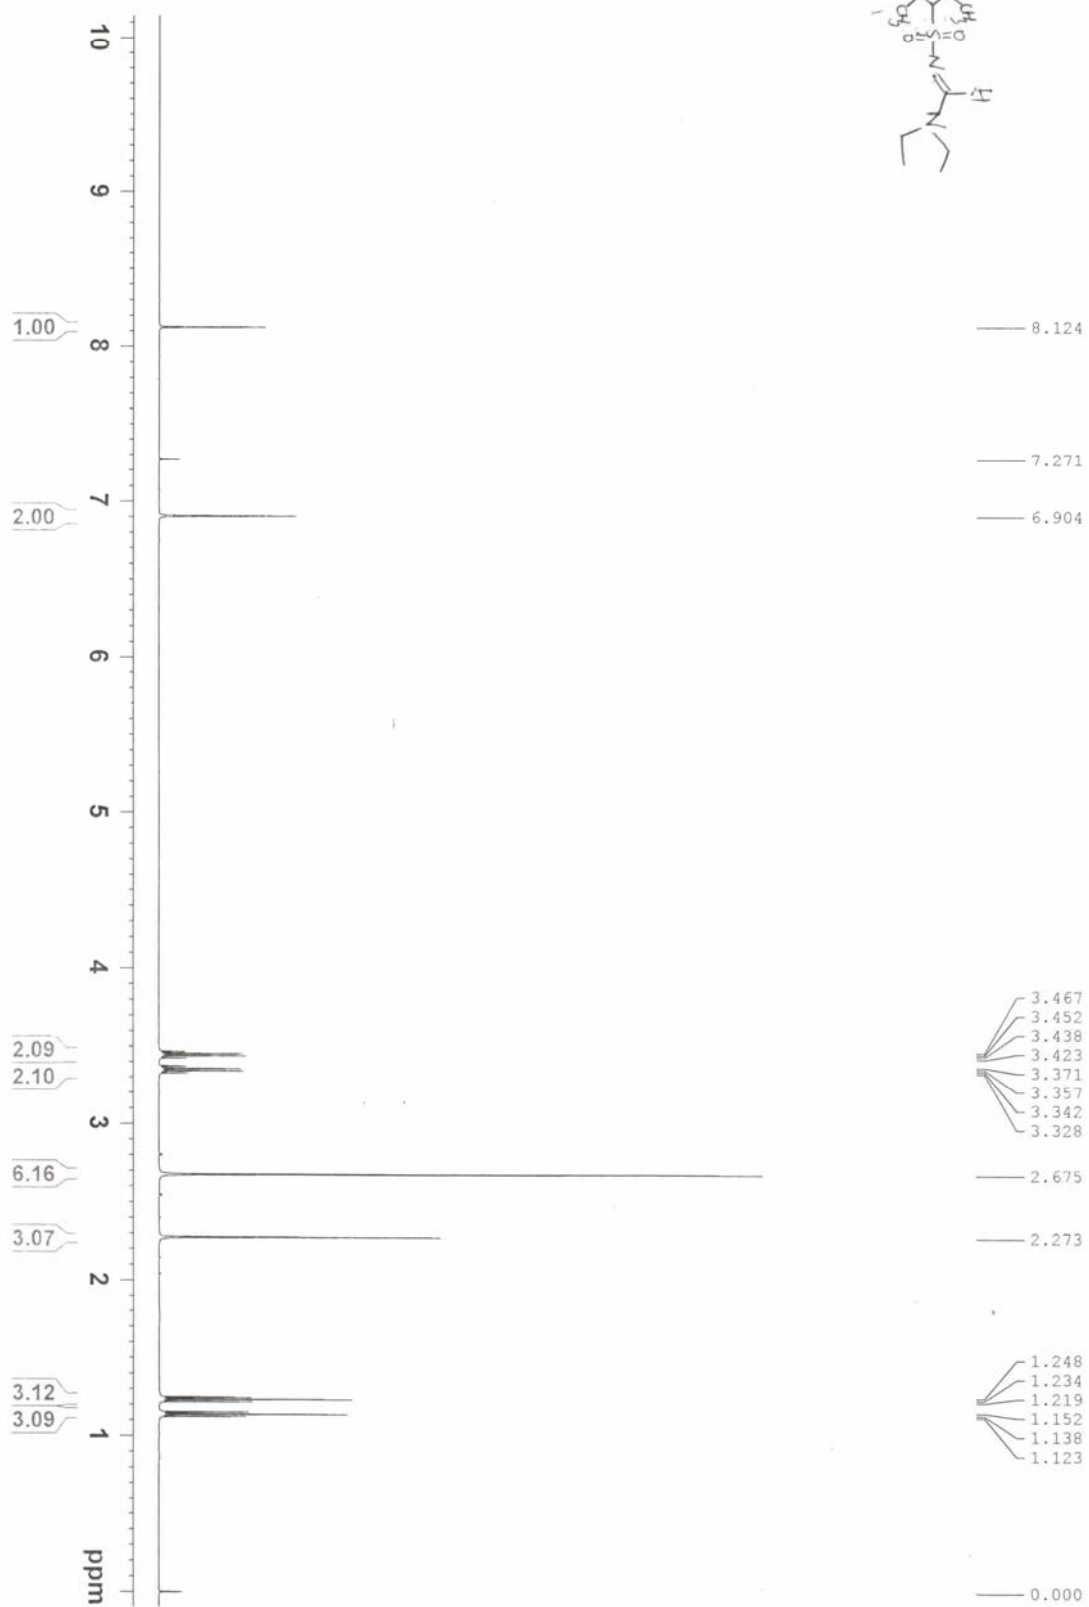



XX-15 CDCl<sub>3</sub>

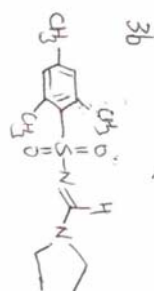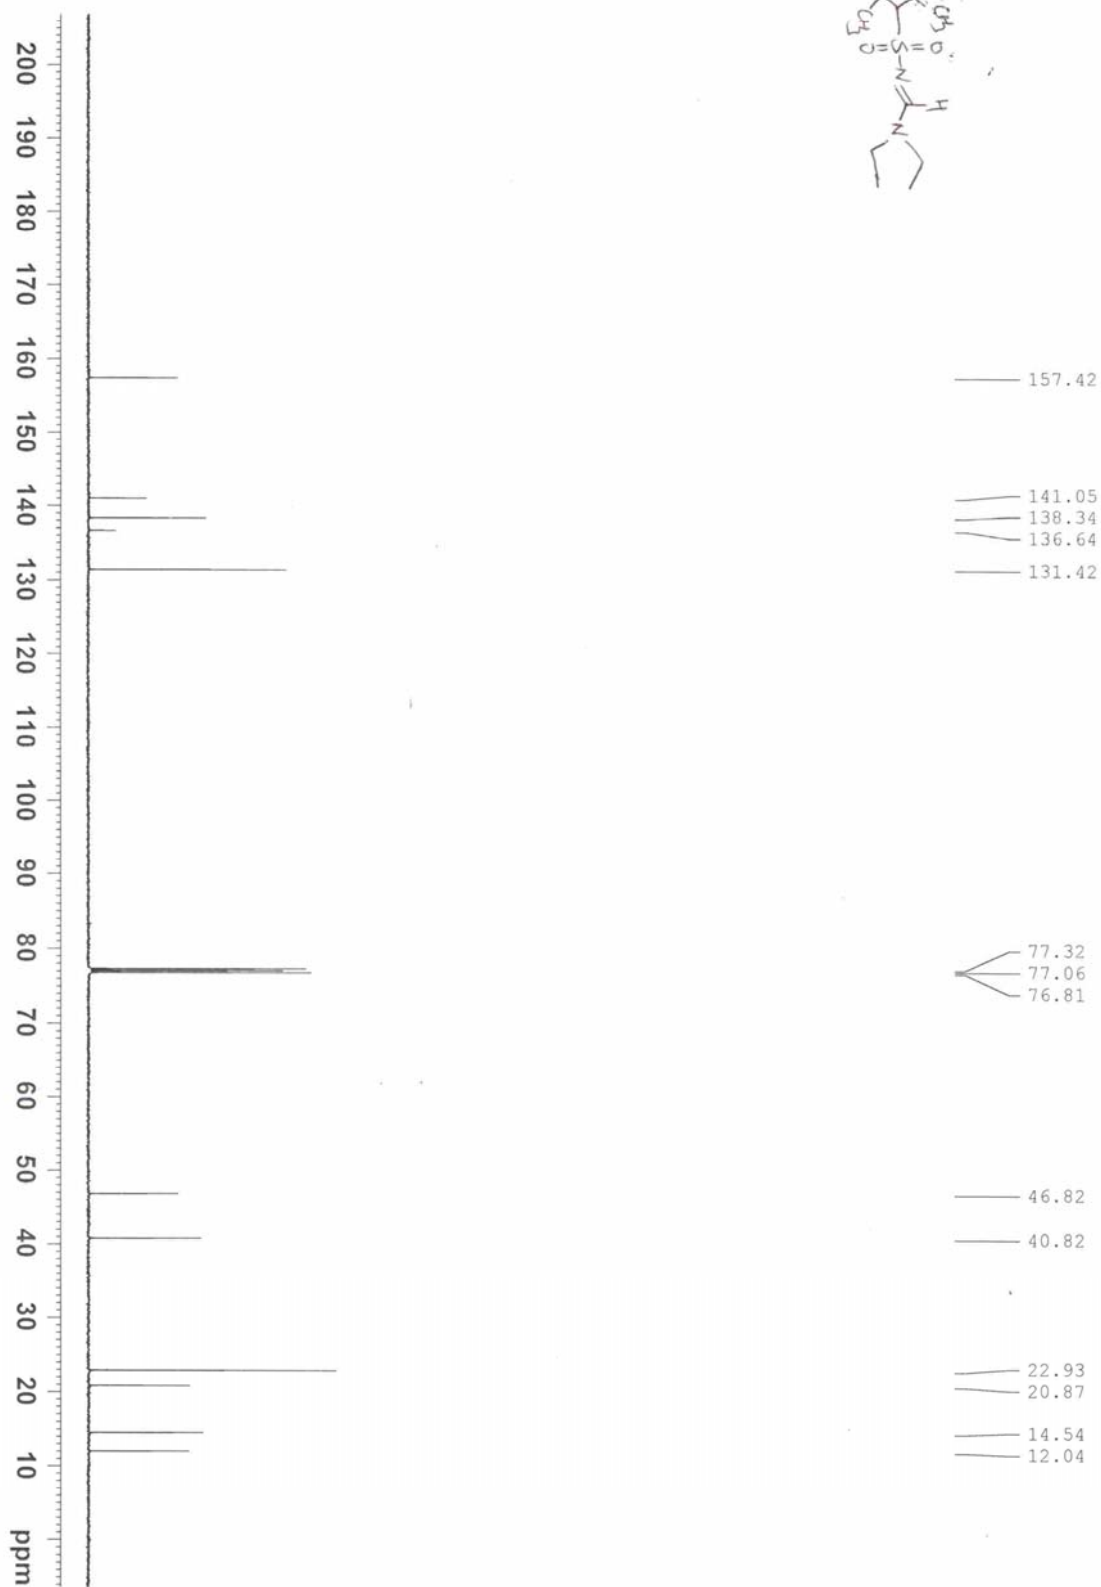

xx2 CDCl3

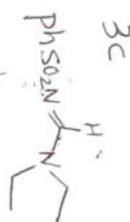

8.158  
7.892  
7.878  
7.875  
7.518  
7.510  
7.504  
7.499  
7.490  
7.473  
7.457  
7.444  
7.281

3.499  
3.485  
3.471  
3.456  
3.406  
3.391  
3.377  
3.363

1.271  
1.257  
1.242  
1.156  
1.141  
1.127

-0.000

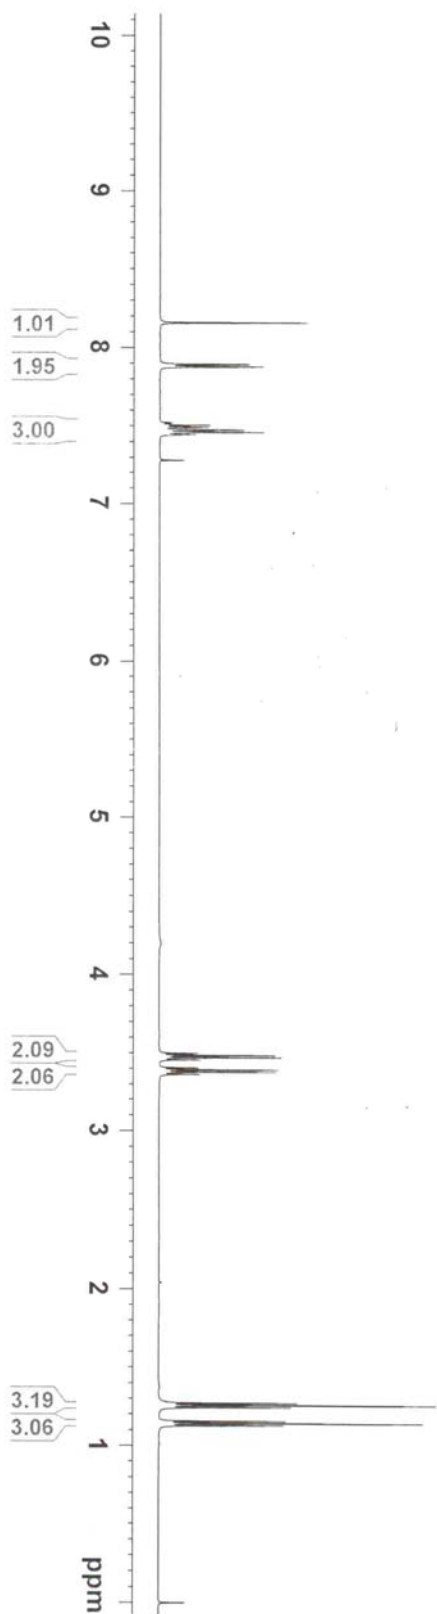

XX2 CDCl3

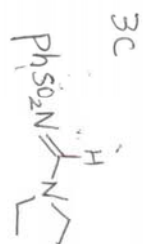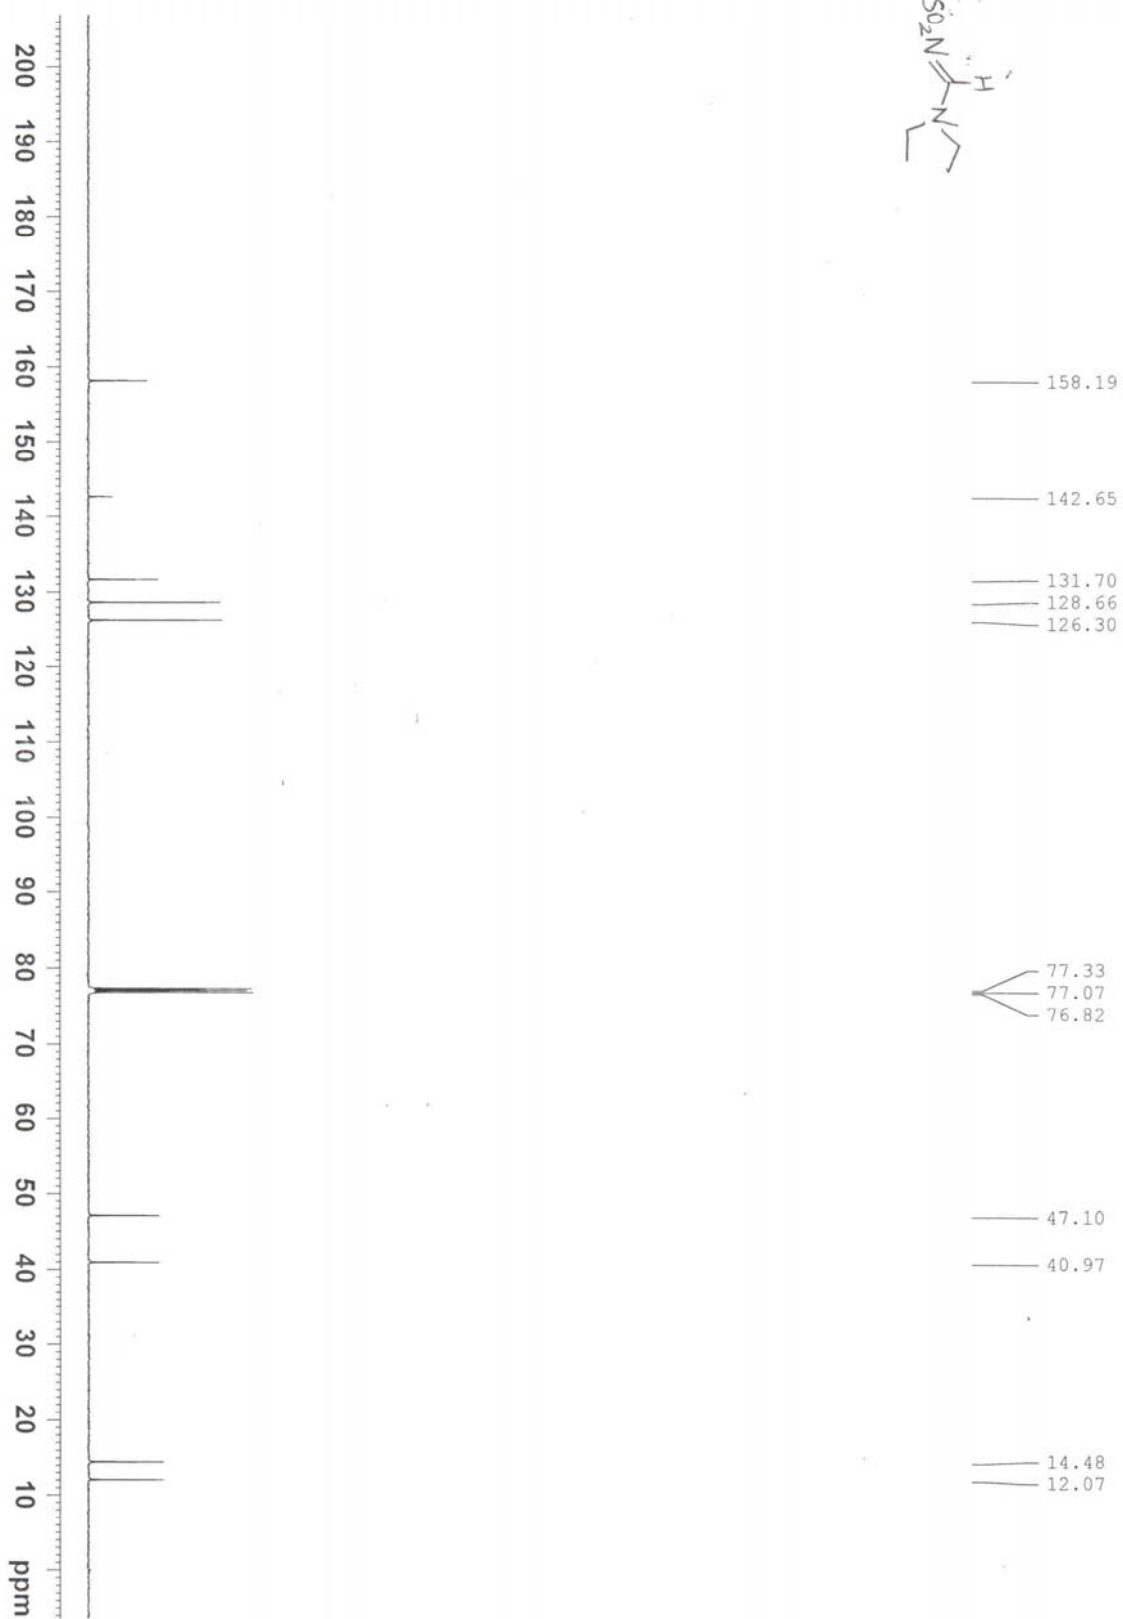

xx-23 CDCl<sub>3</sub>

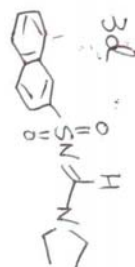

8.466  
8.211  
7.944  
7.928  
7.926  
7.922  
7.904  
7.872  
7.869  
7.859  
7.856  
7.852  
7.601  
7.590  
7.587  
7.575  
7.571  
7.559  
7.557  
7.545  
7.275

3.488  
3.474  
3.460  
3.445  
3.394  
3.380  
3.365  
3.351

1.253  
1.238  
1.224  
1.134  
1.119  
1.105

0.000

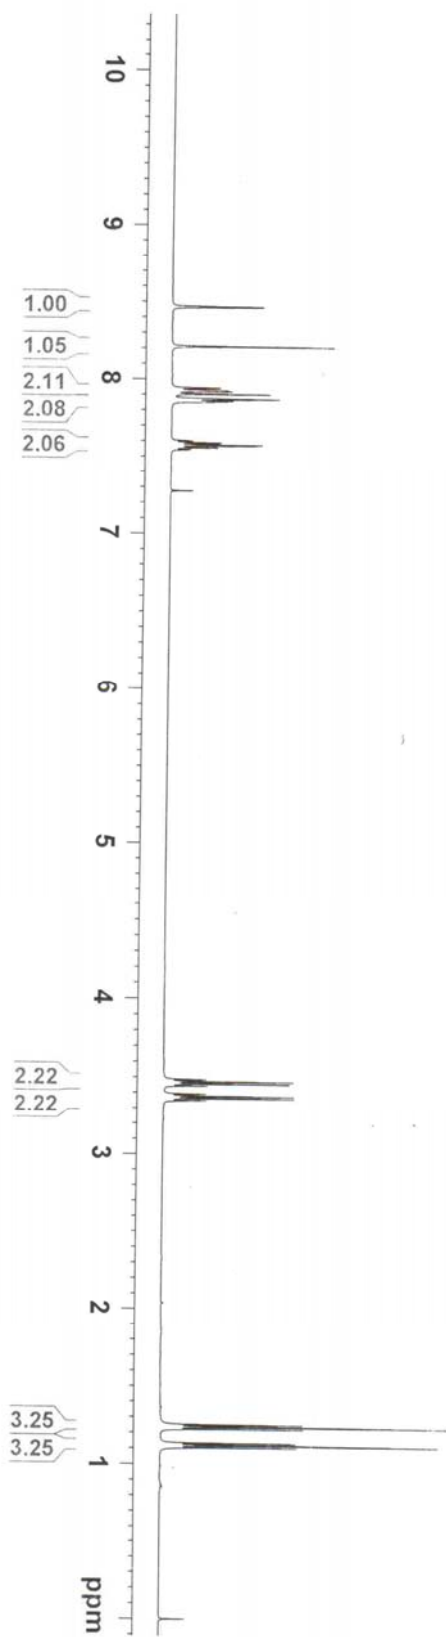

XX-23 CDCl<sub>3</sub>

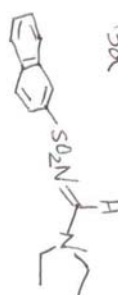

158.21

139.57  
134.45  
132.19  
129.16  
128.94  
128.23  
127.81  
127.17  
126.87  
122.51

77.36  
77.11  
76.85

47.14

40.99

14.48  
12.06

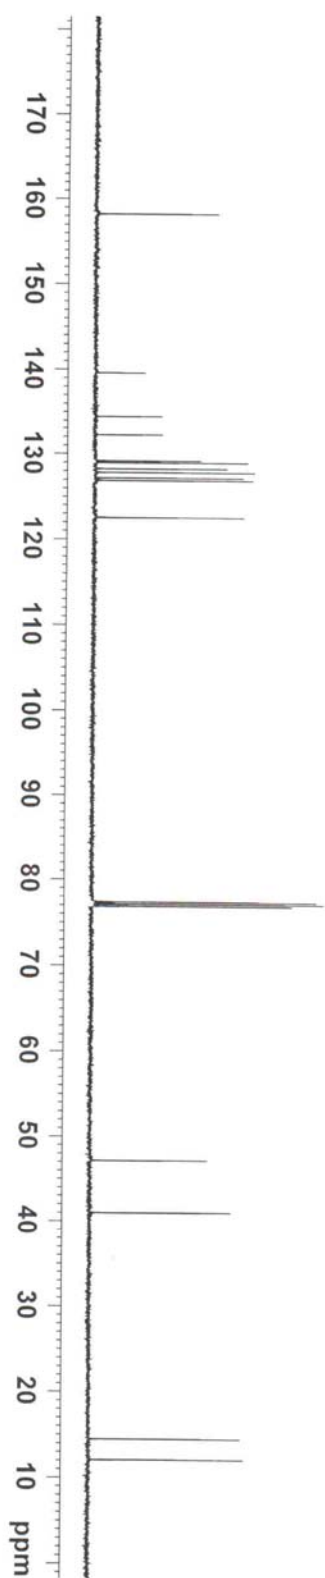

xx-21 CDCl<sub>3</sub>

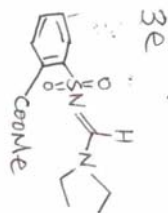

8.149  
8.145  
8.136  
8.133  
8.131  
8.112  
7.575  
7.571  
7.562  
7.557  
7.552  
7.548  
7.542  
7.537  
7.534  
7.525  
7.521  
7.519  
7.511  
7.288

3.934  
3.493  
3.479  
3.464  
3.450  
3.437  
3.422  
3.408  
3.393

1.307  
1.293  
1.278  
1.158  
1.143  
1.129

0.000

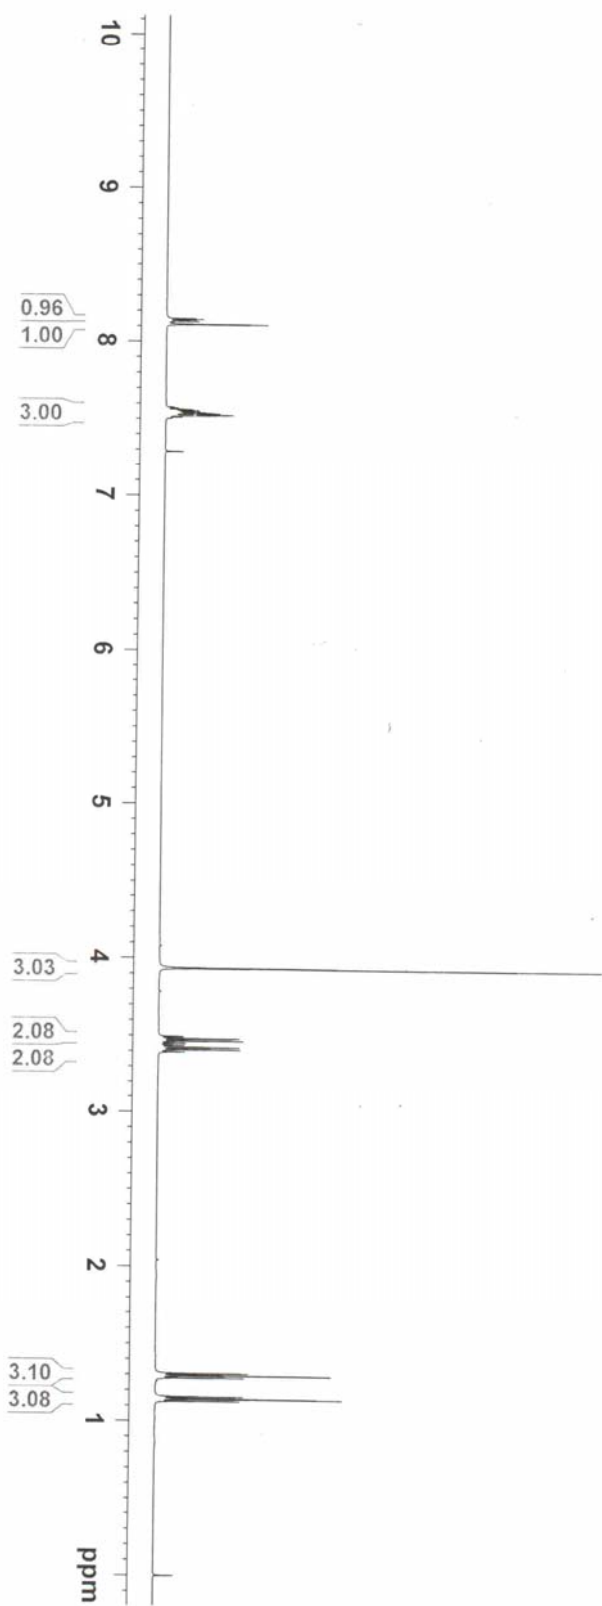

xx-21 CDCl<sub>3</sub>

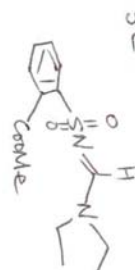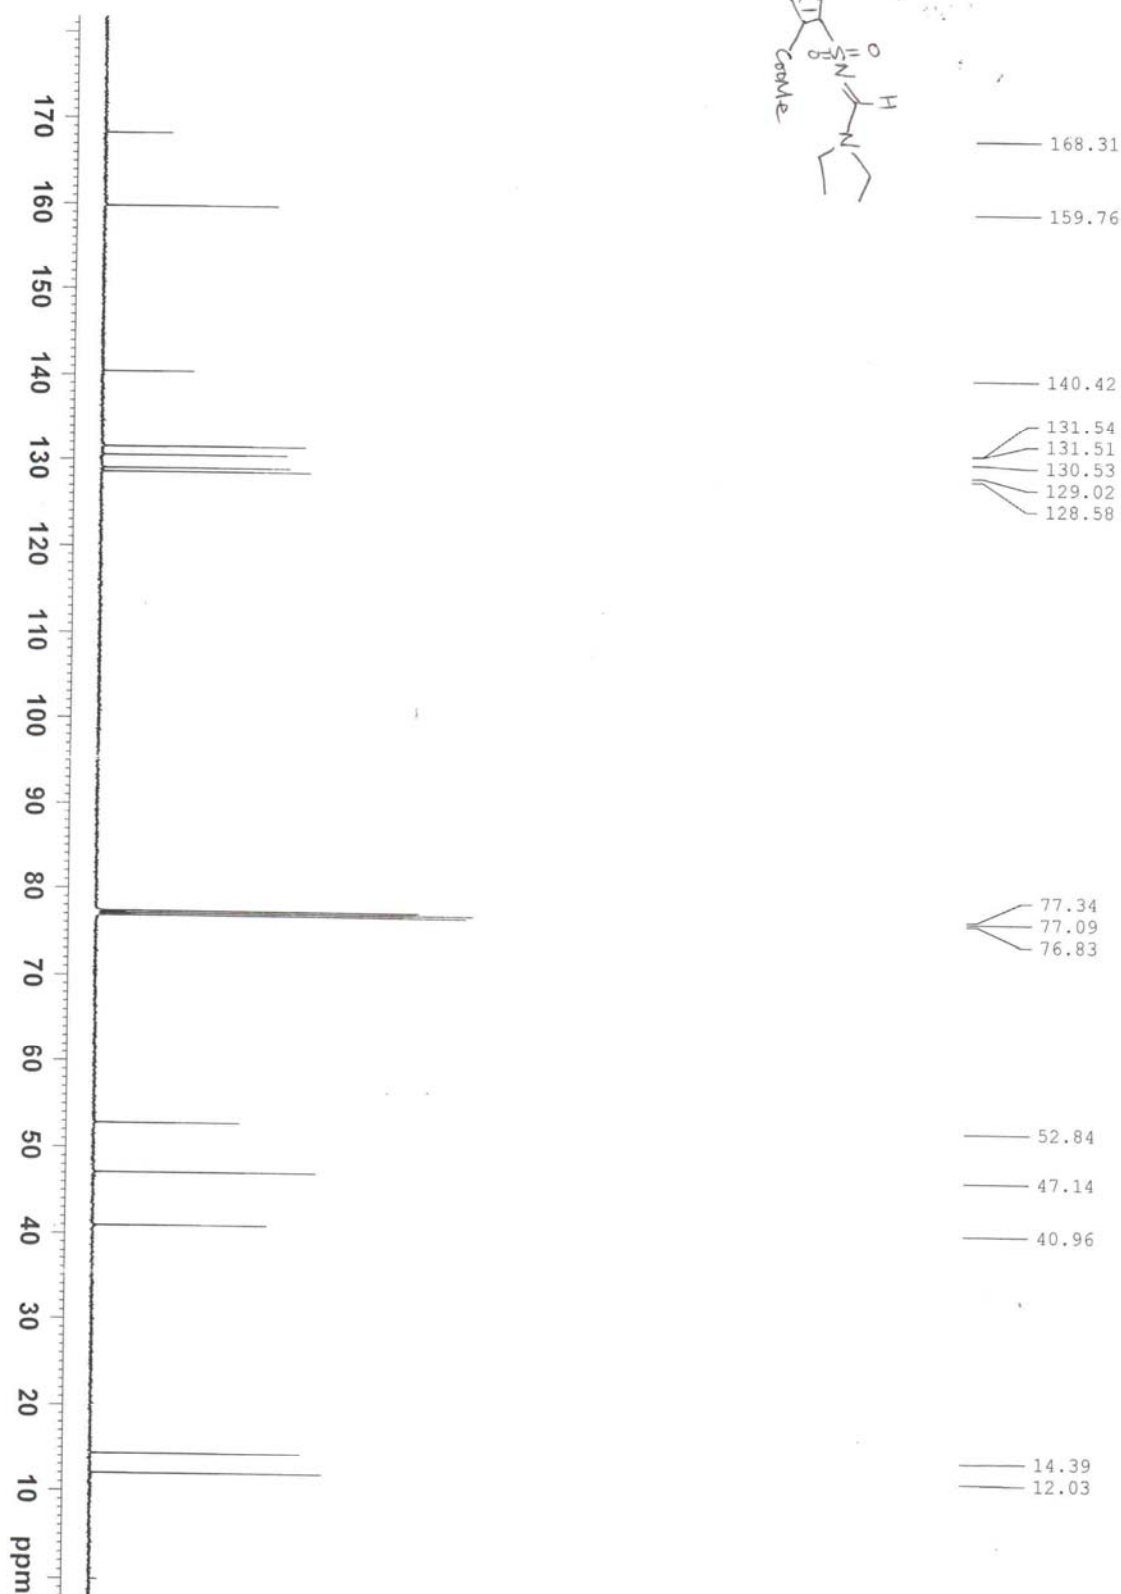

xx5 CDCl3

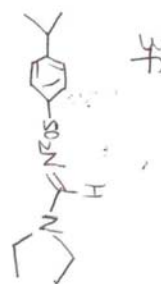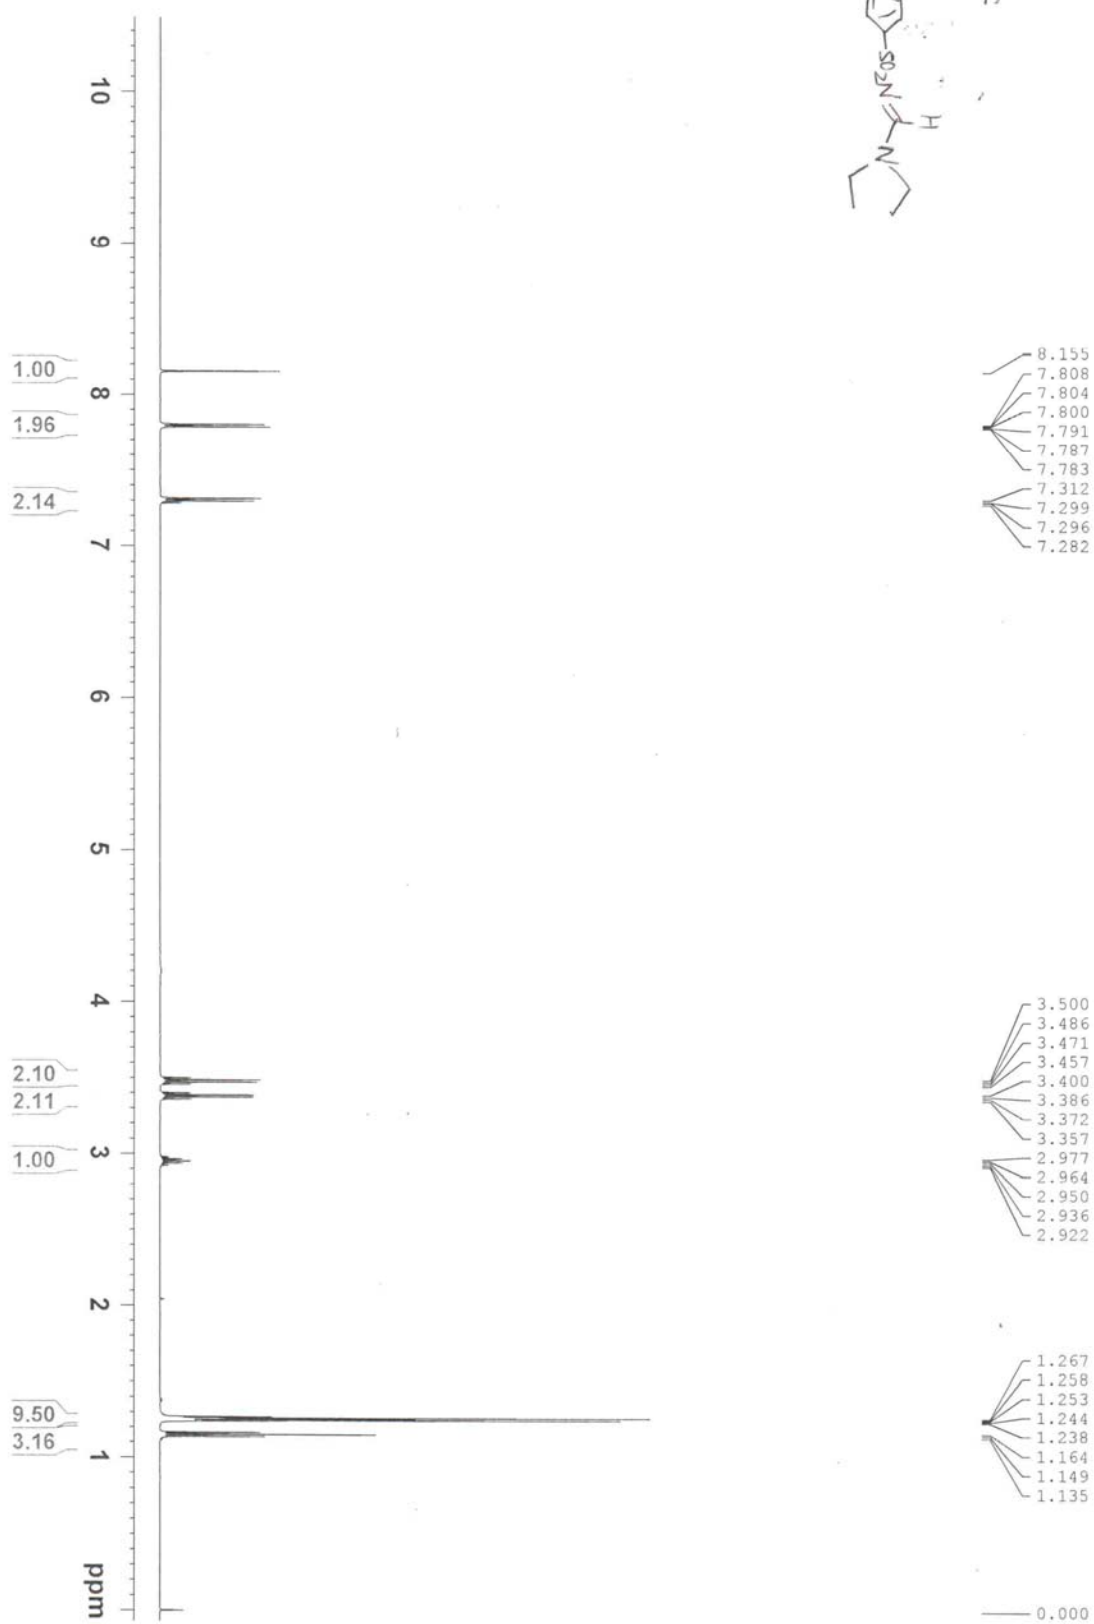



XX5 CDCl<sub>3</sub>

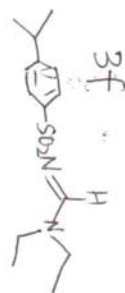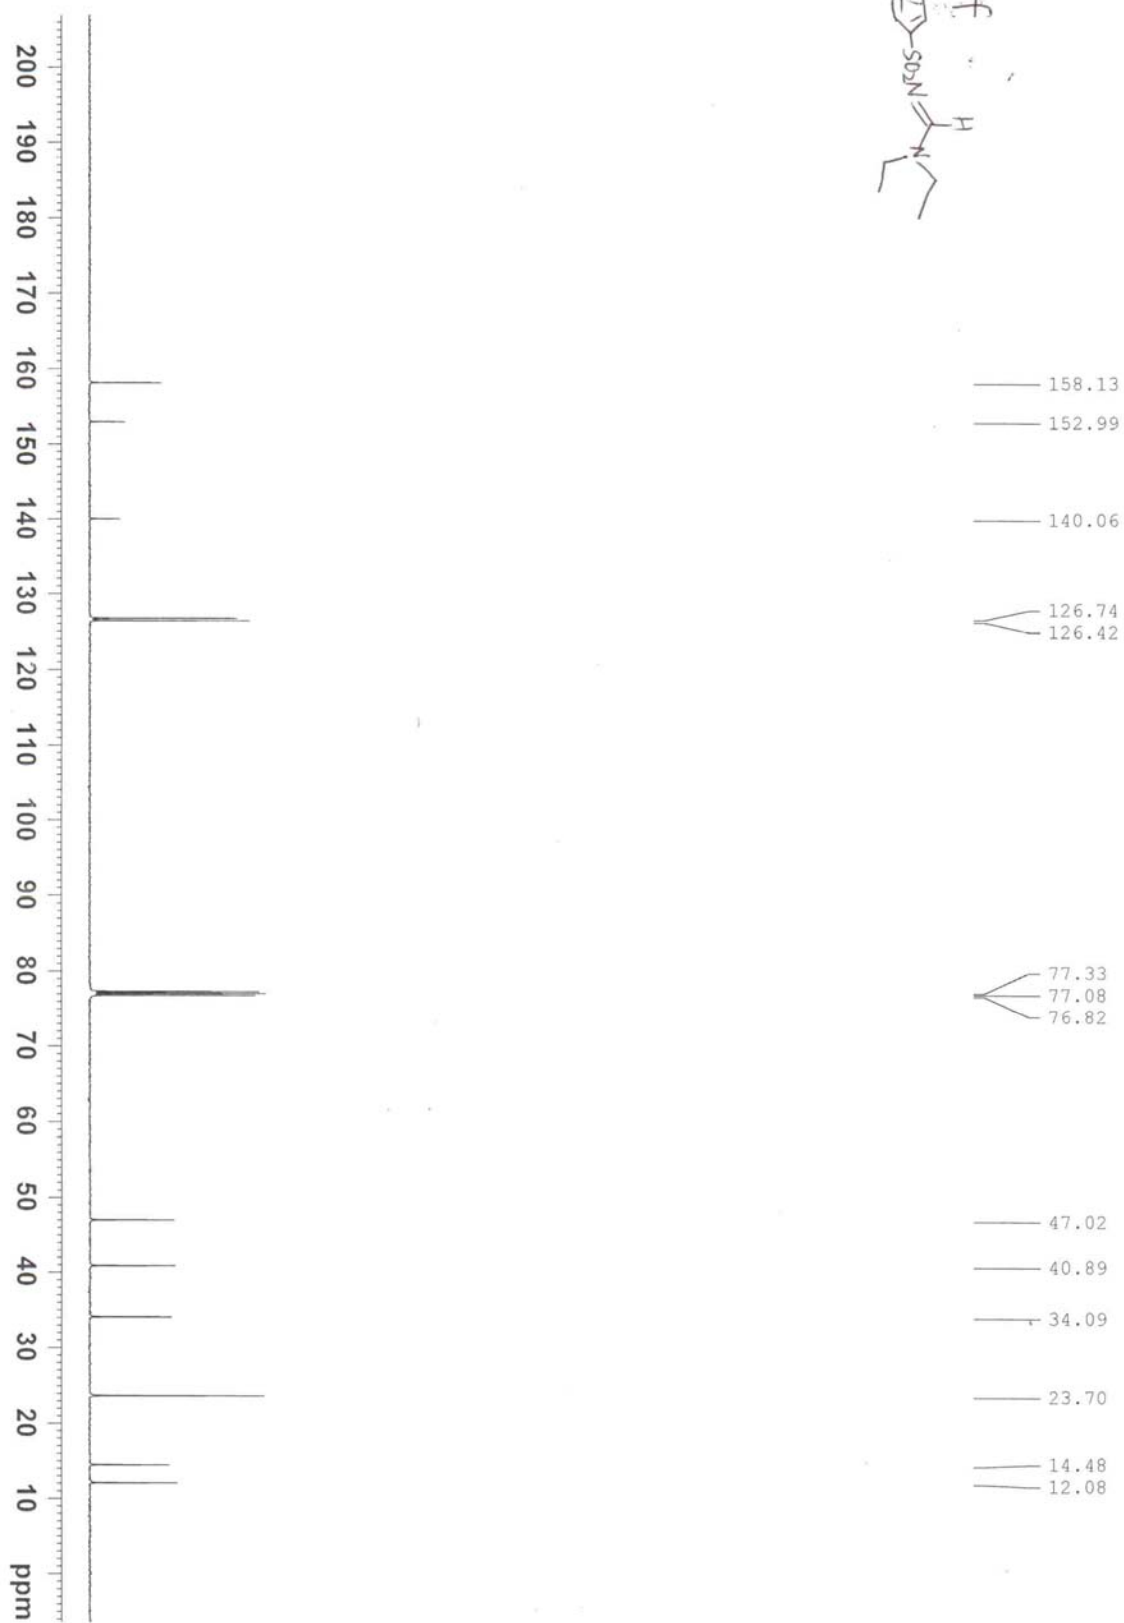

xx4 CDCl3

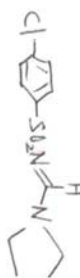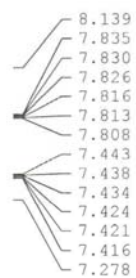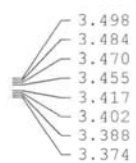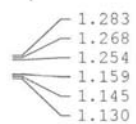

-0.000

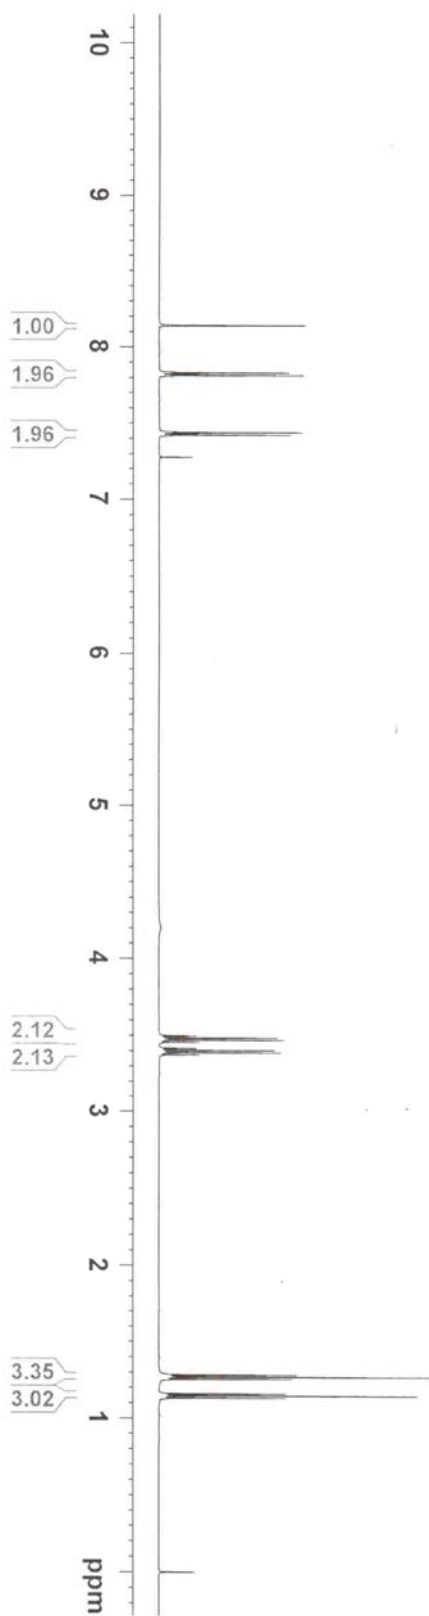

XX4 CDCl<sub>3</sub>

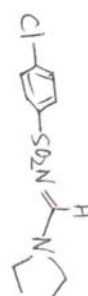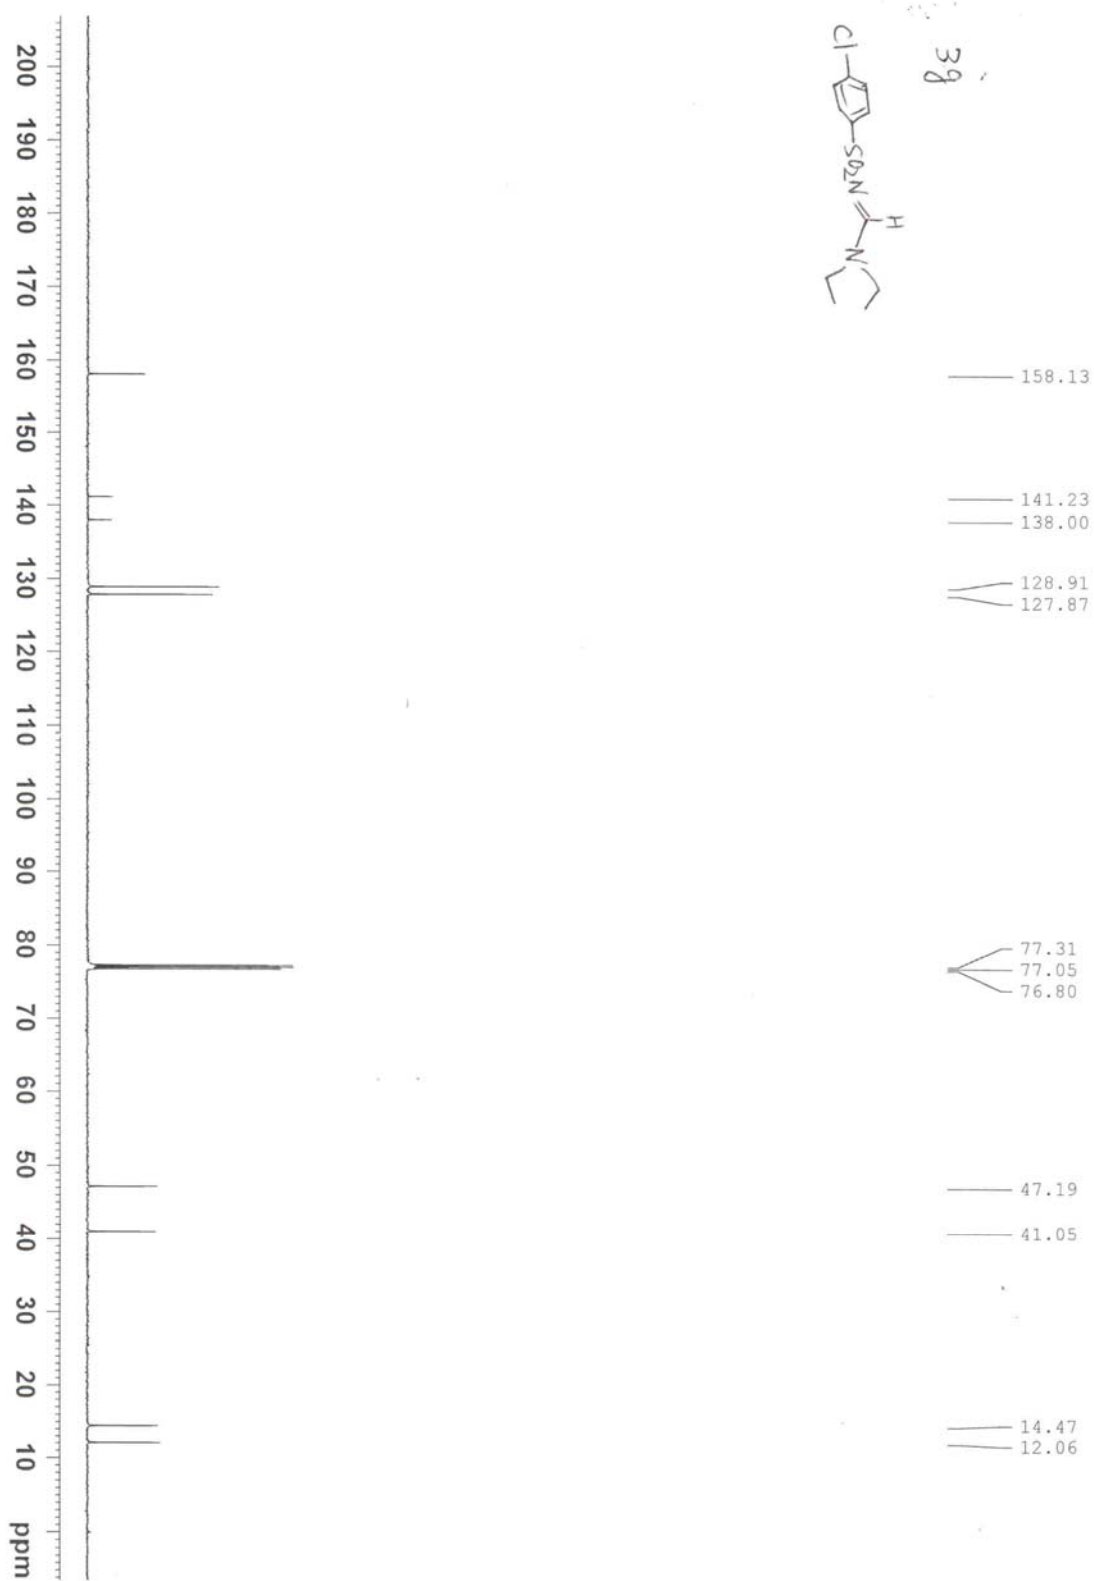

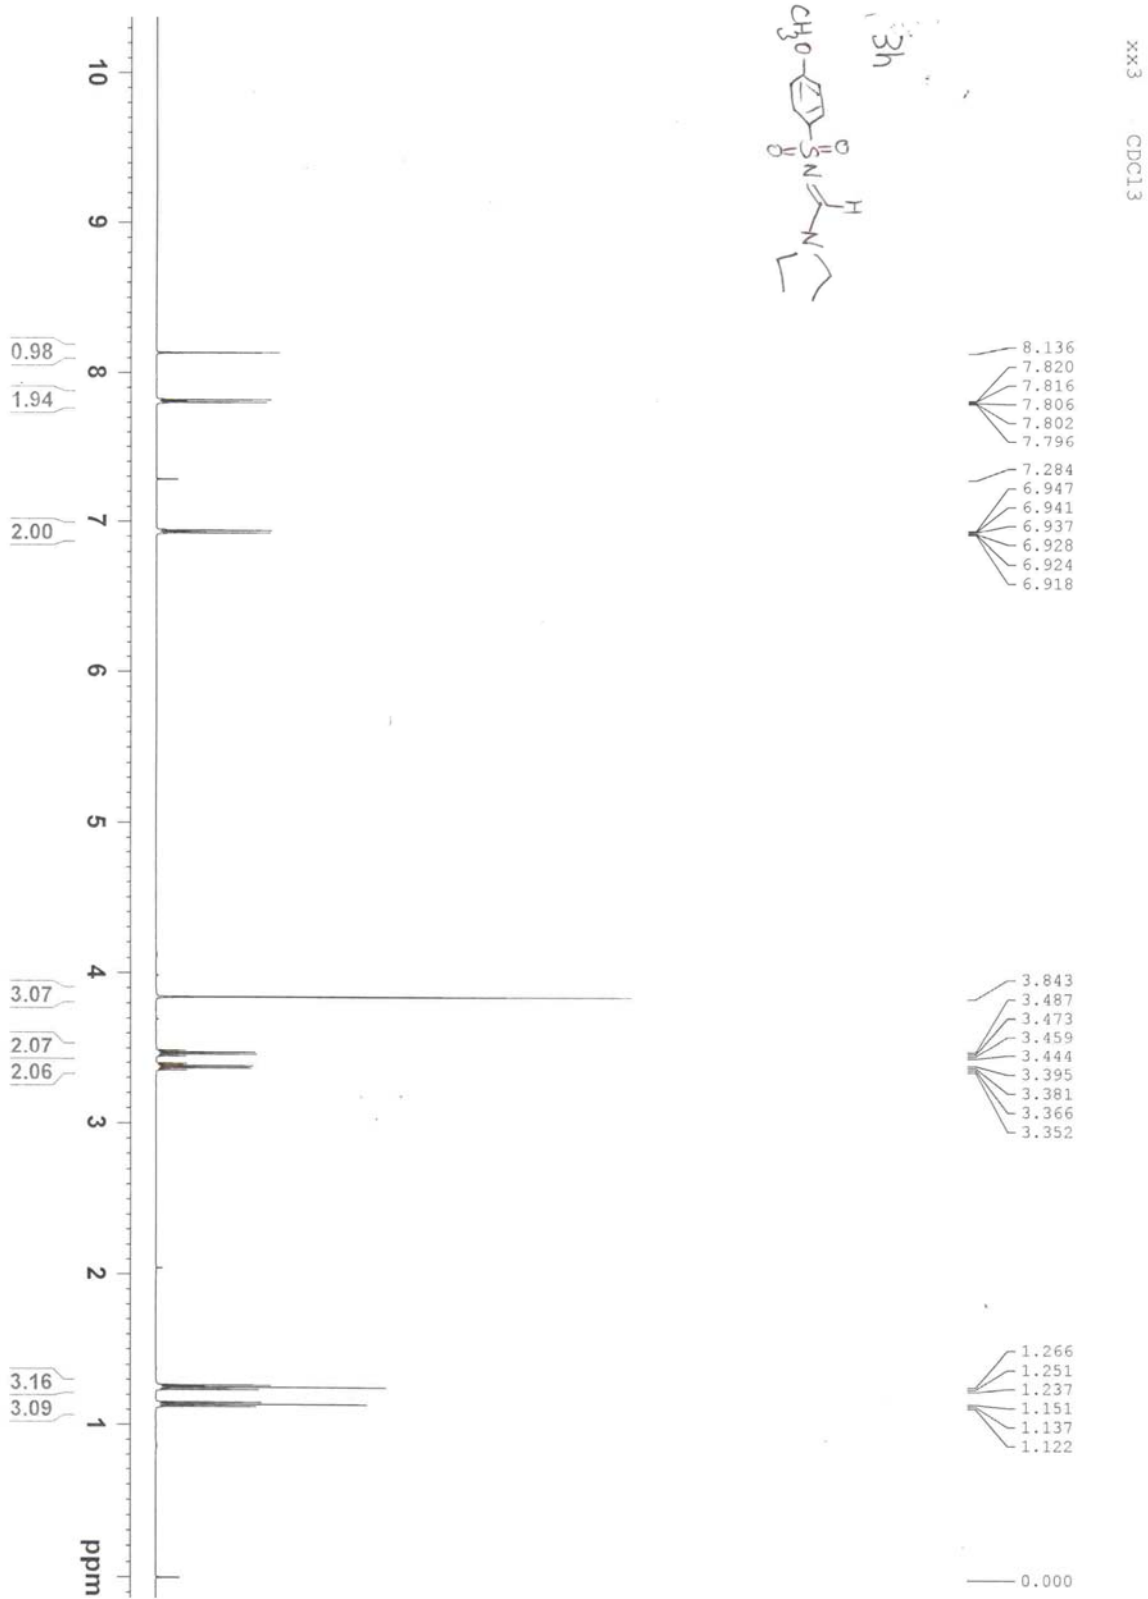

XX3 CDCl3

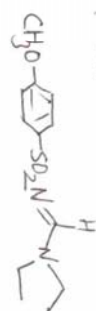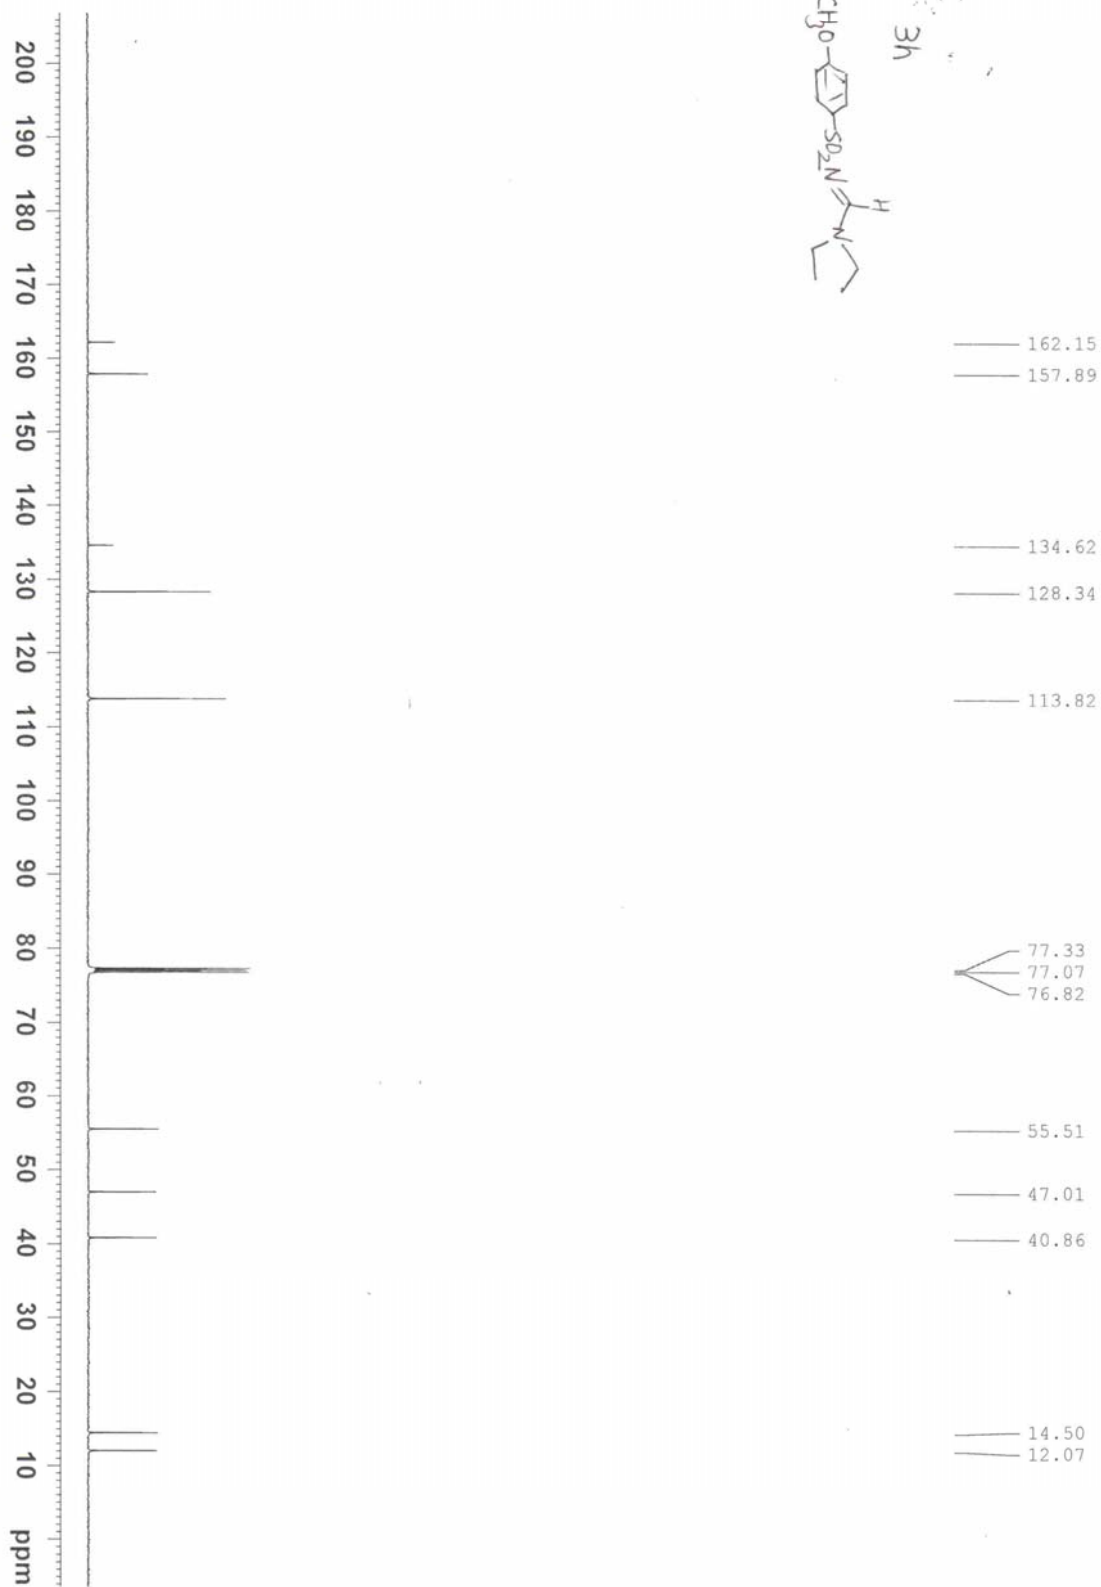

XX-24 CDCl<sub>3</sub>

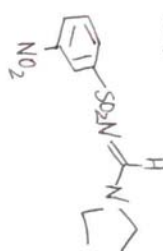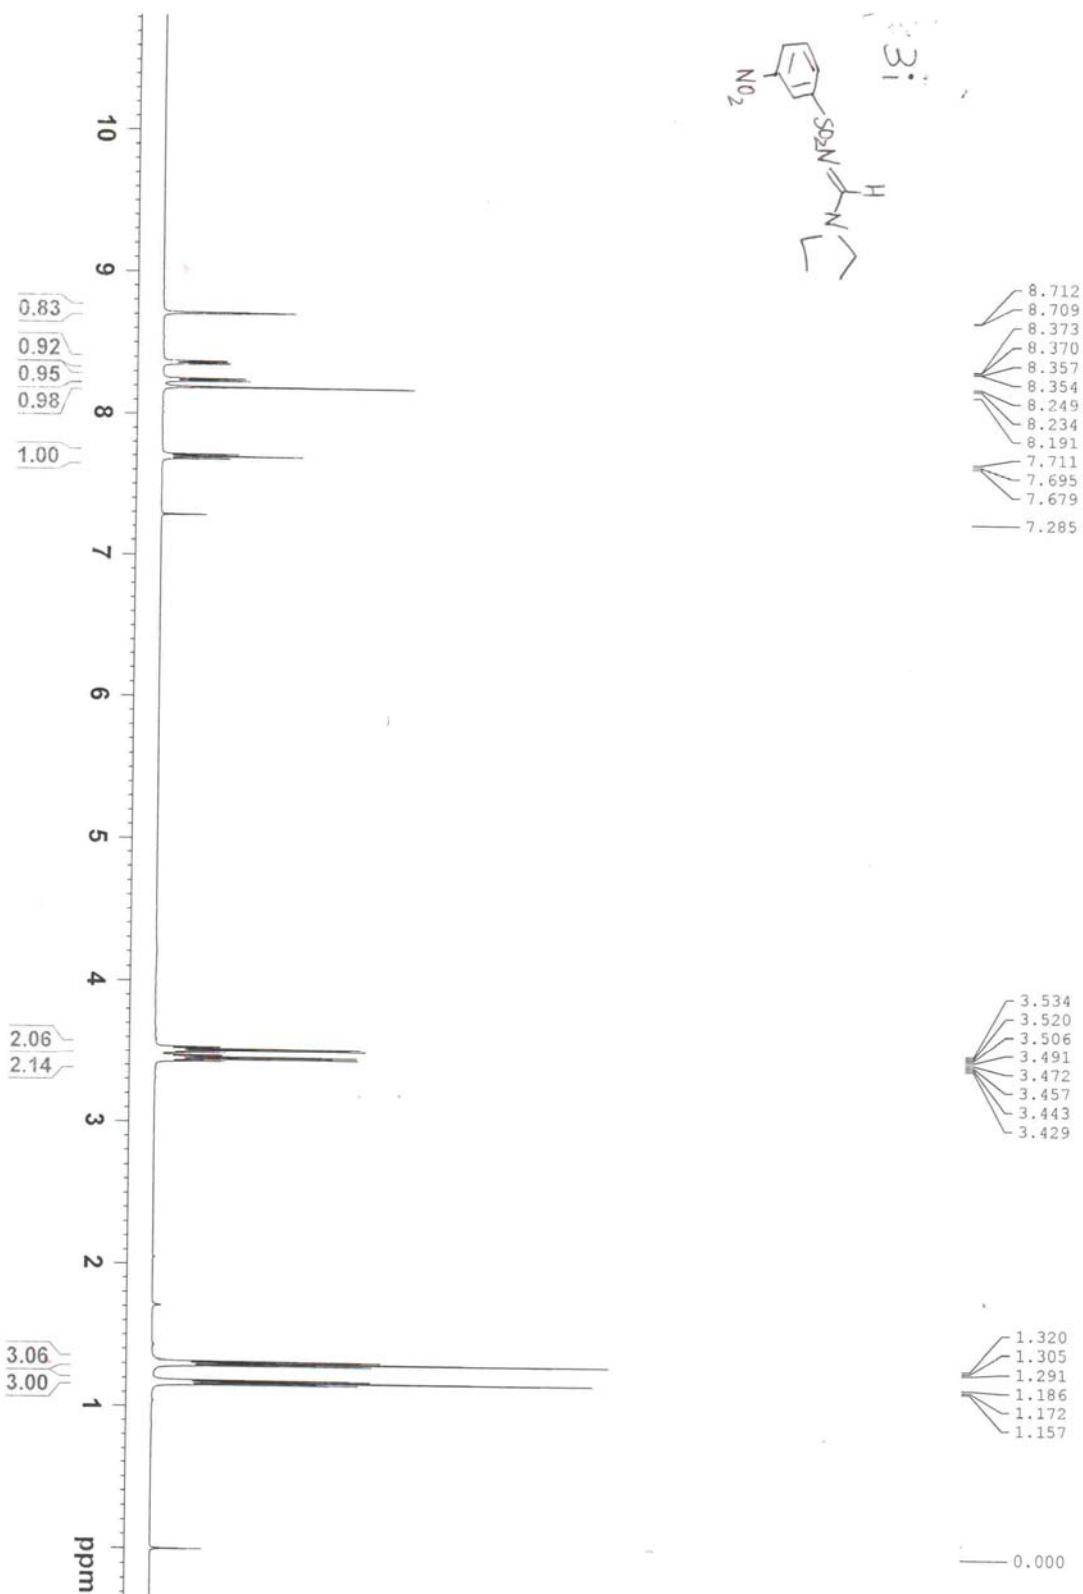

XX-24 CDCl<sub>3</sub>

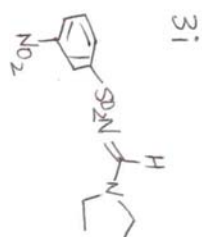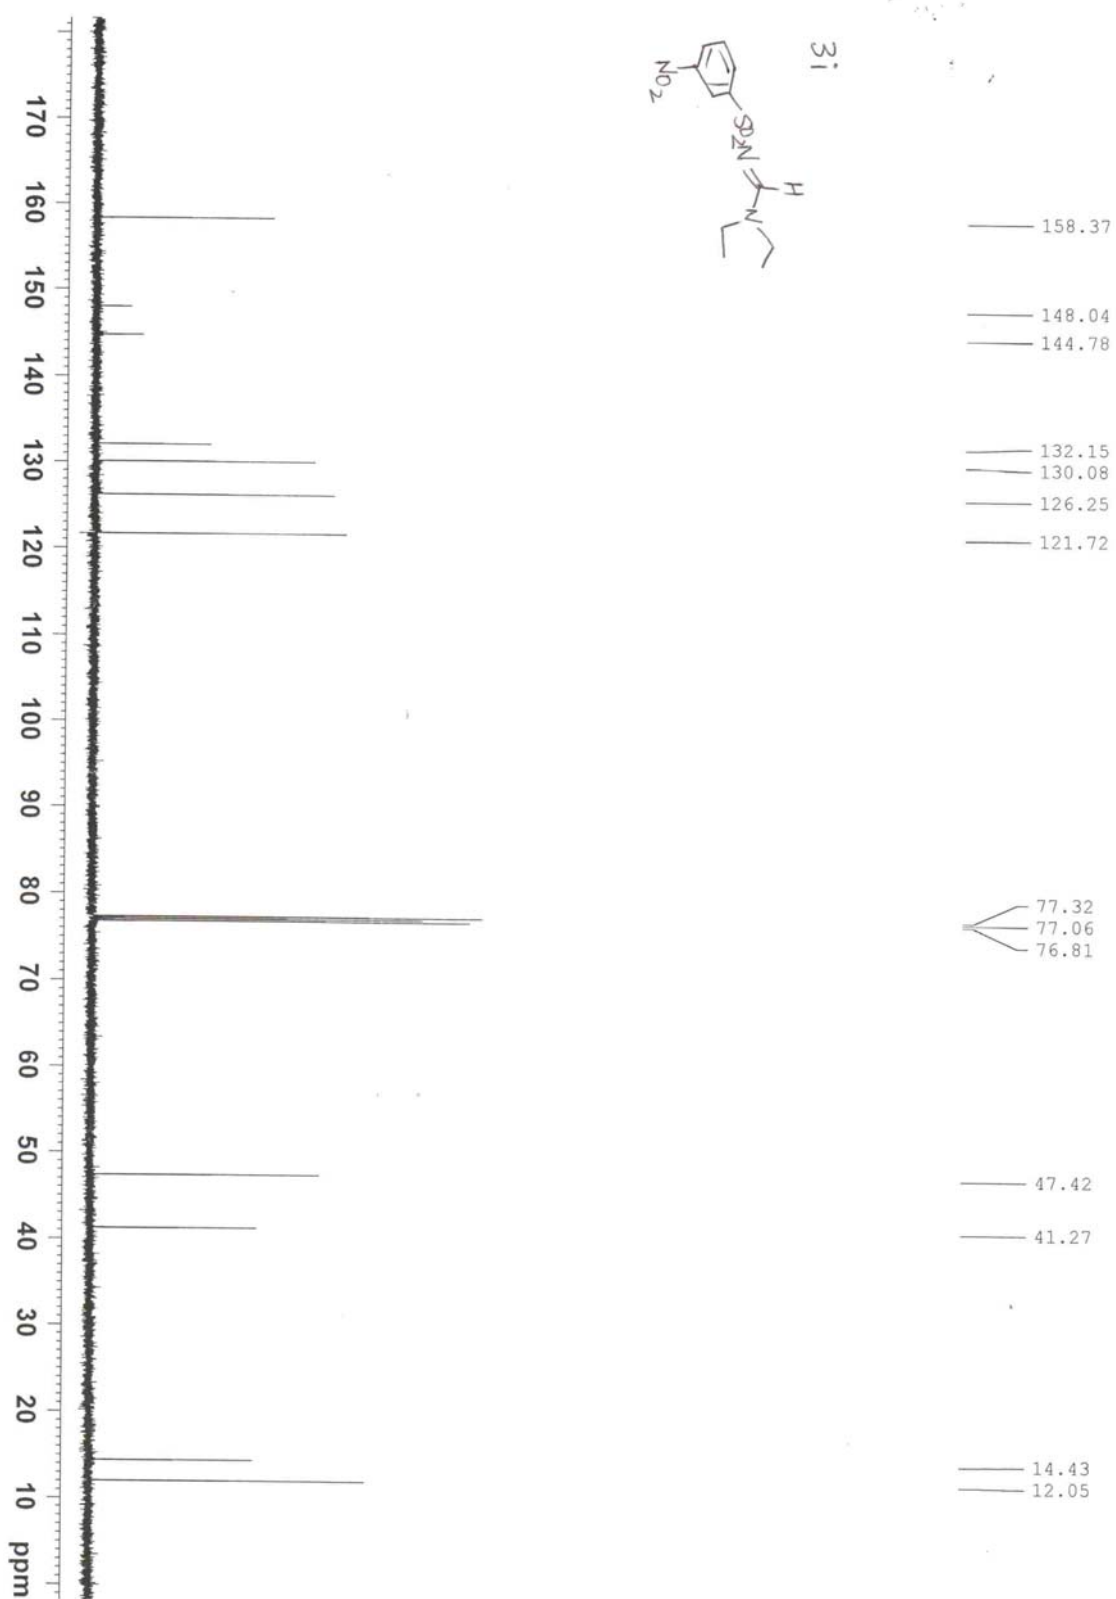

xx-18 CDCl<sub>3</sub>

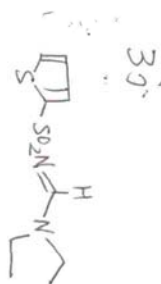

8.146  
7.587  
7.585  
7.580  
7.577  
7.501  
7.498  
7.491  
7.489  
7.285  
7.033  
7.025  
7.023  
7.016

3.523  
3.509  
3.494  
3.480  
3.424  
3.410  
3.395  
3.381

1.287  
1.273  
1.258  
1.193  
1.179  
1.164

0.000

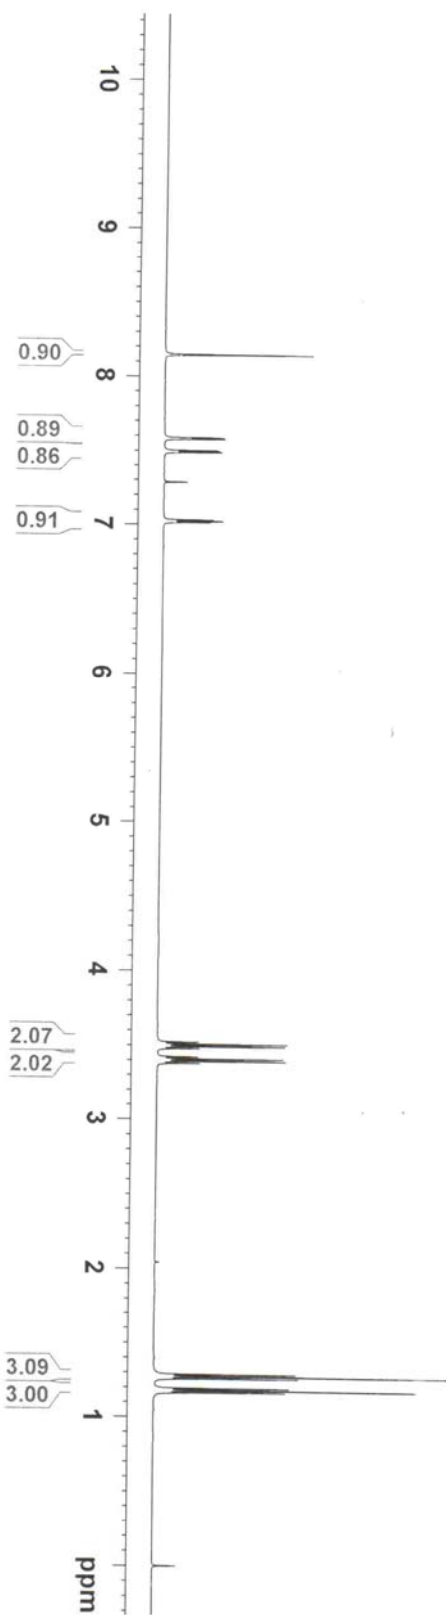



XX-18 CDCl<sub>3</sub>

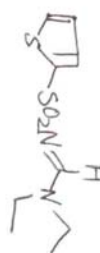

158.27

144.25

130.51

130.29

126.90

77.34

77.09

76.83

47.28

41.16

14.48

12.13

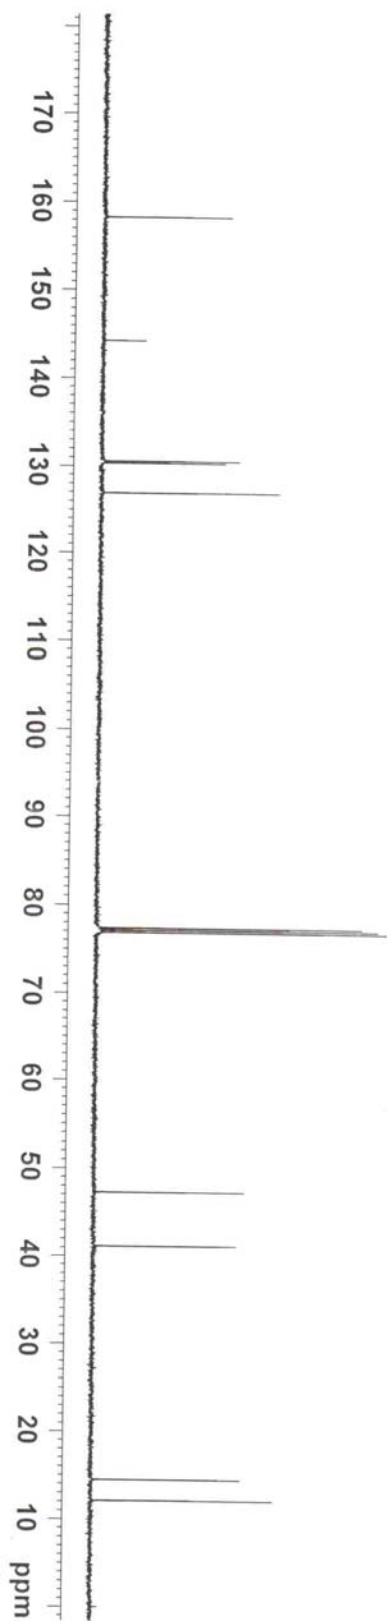

xx-19 CDCl<sub>3</sub>

3K

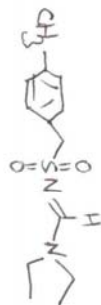

7.428  
7.275  
7.232  
7.216  
7.136  
7.120

4.227

3.443  
3.429  
3.414  
3.154  
3.140  
3.126

2.328

1.181  
1.167  
1.152  
1.065  
1.050  
1.036

0.000

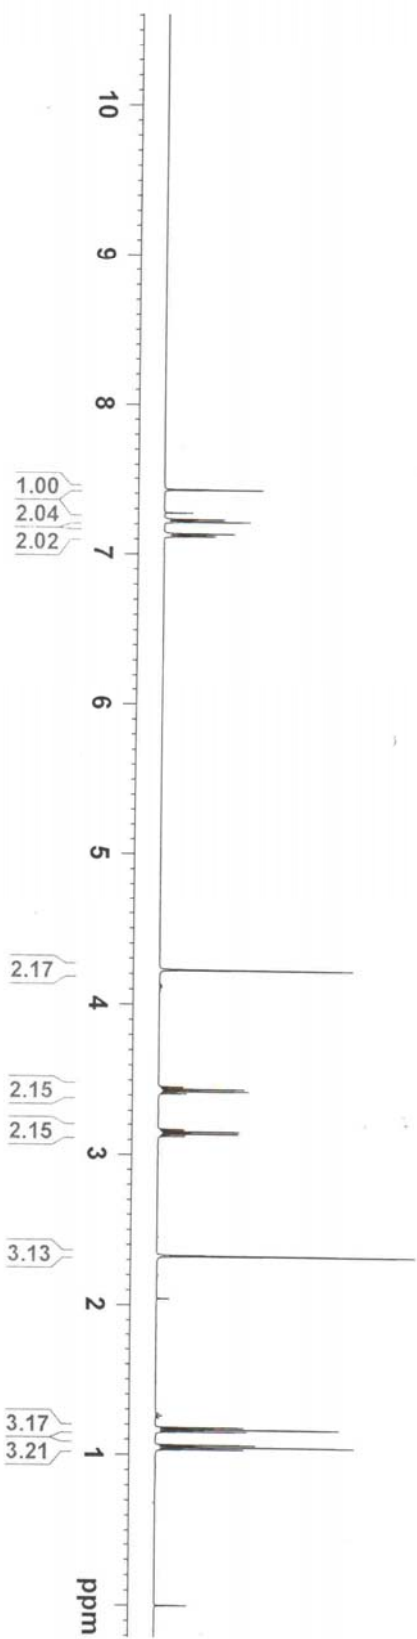

XX-19 CDCl<sub>3</sub>

3K

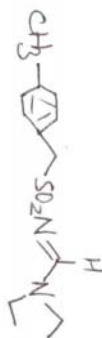

|        |
|--------|
| 159.47 |
| 138.05 |
| 130.81 |
| 129.07 |
| 127.33 |
| 77.32  |
| 77.07  |
| 76.81  |
| 59.33  |
| 46.75  |
| 40.82  |
| 21.15  |
| 14.38  |
| 12.00  |

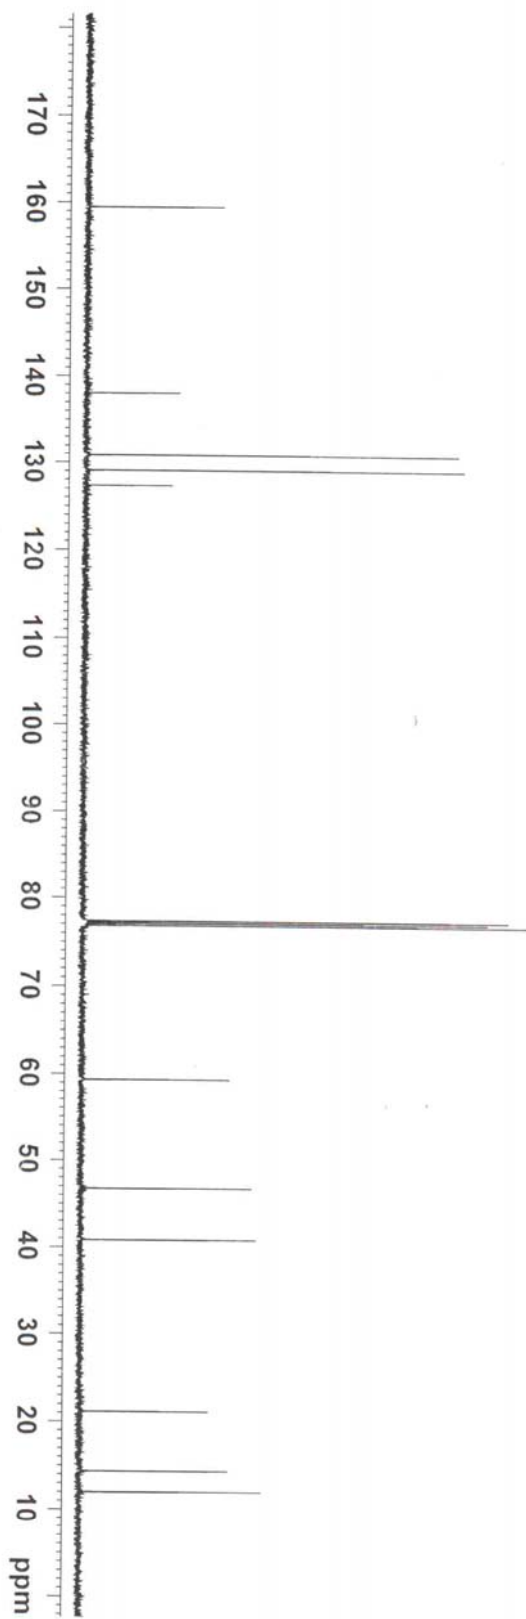

XX-7-2 CDCl<sub>3</sub>

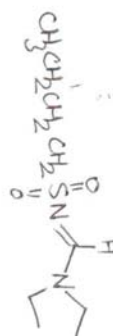

8.043  
7.327

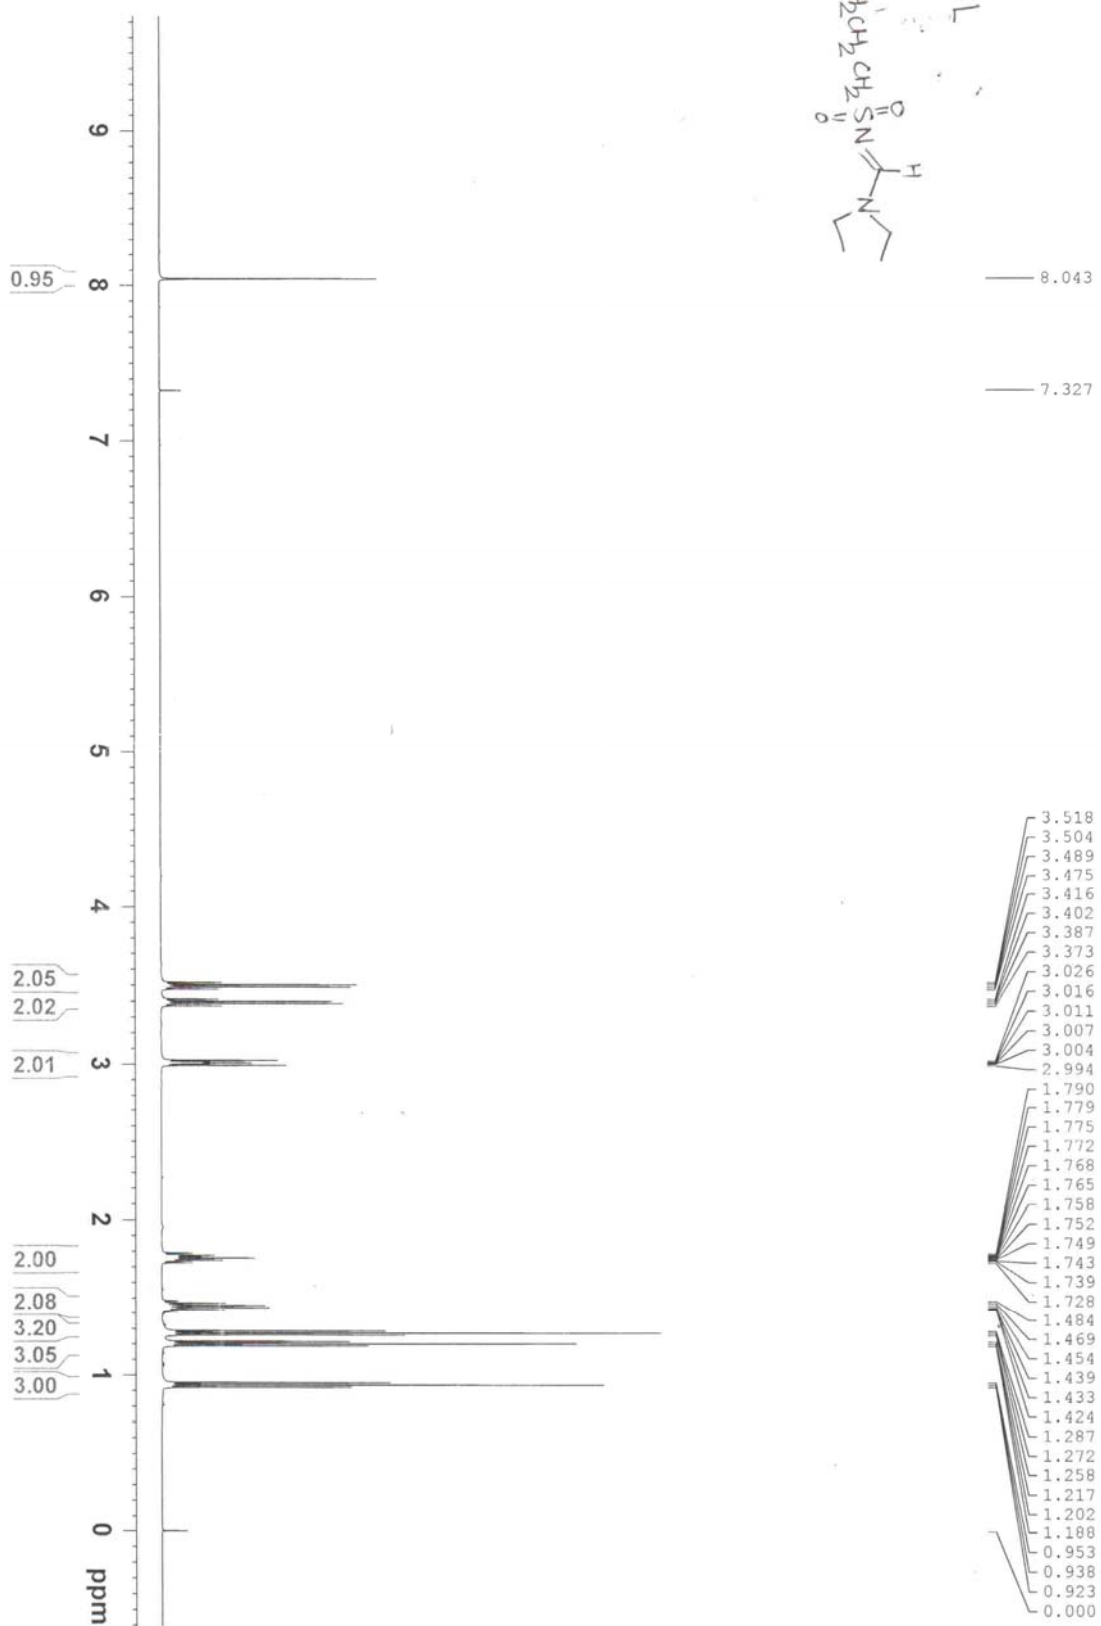

XX-7-2 CDC13

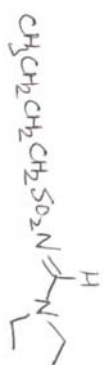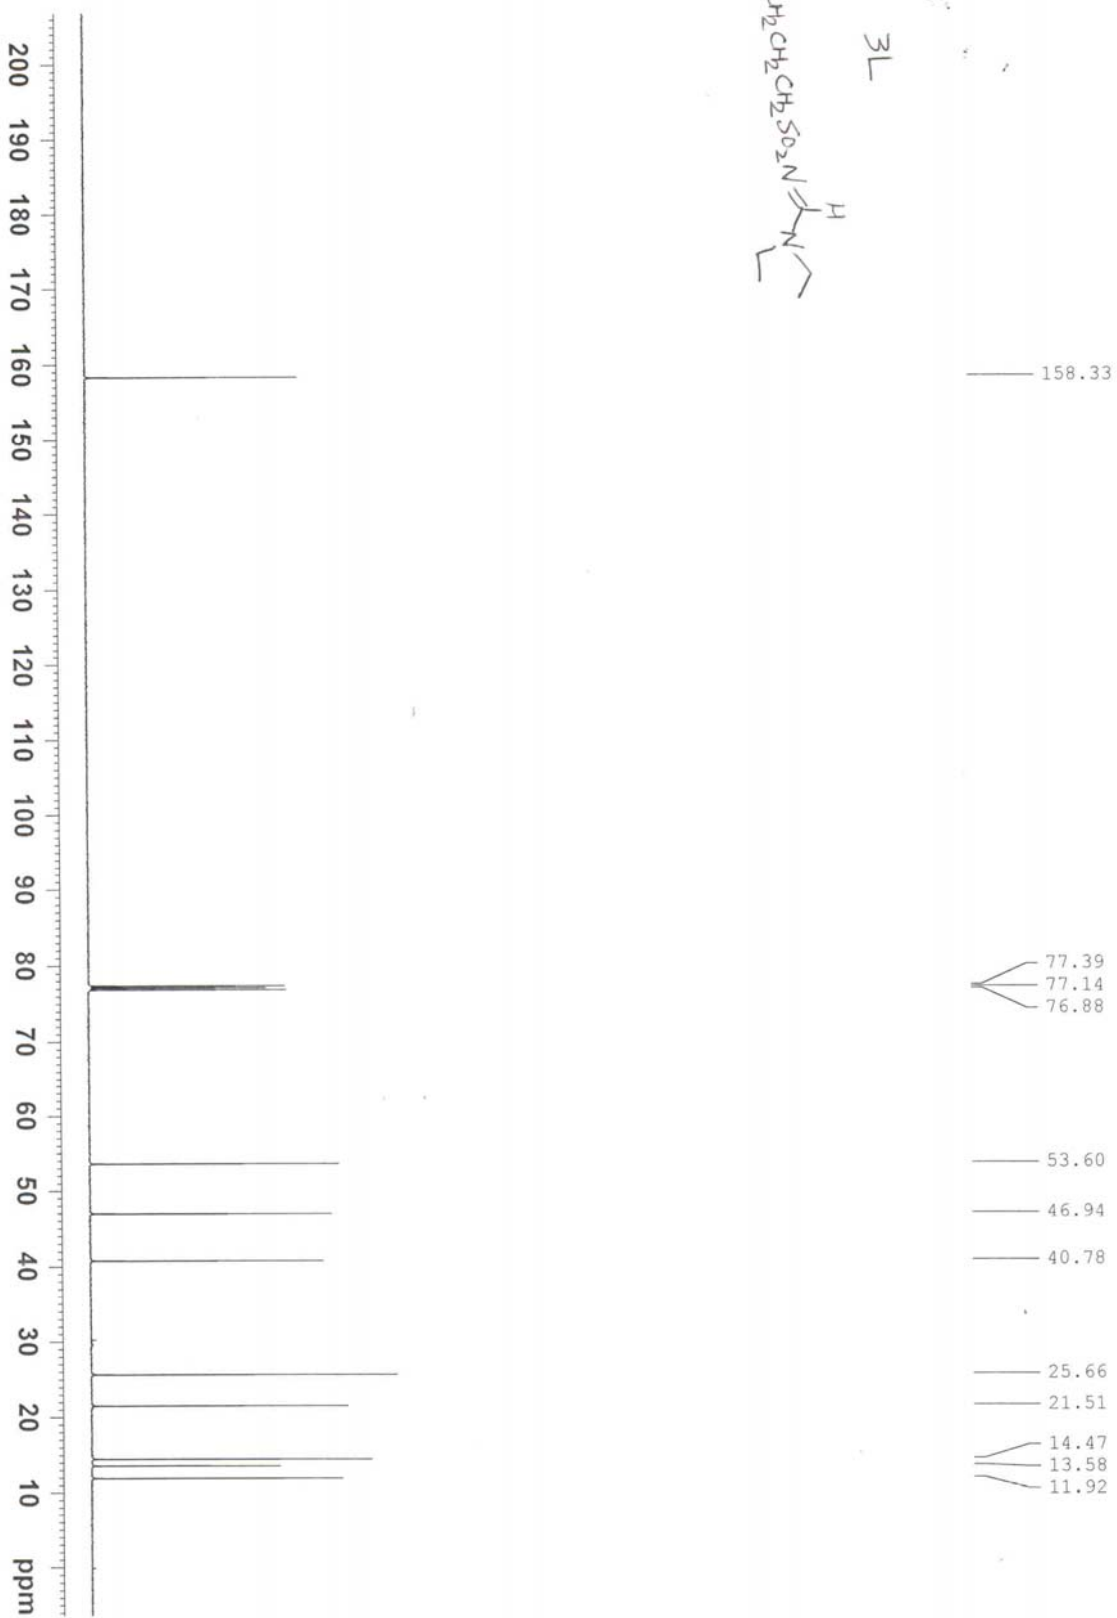

XX-34 CDCl<sub>3</sub>

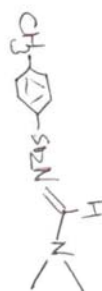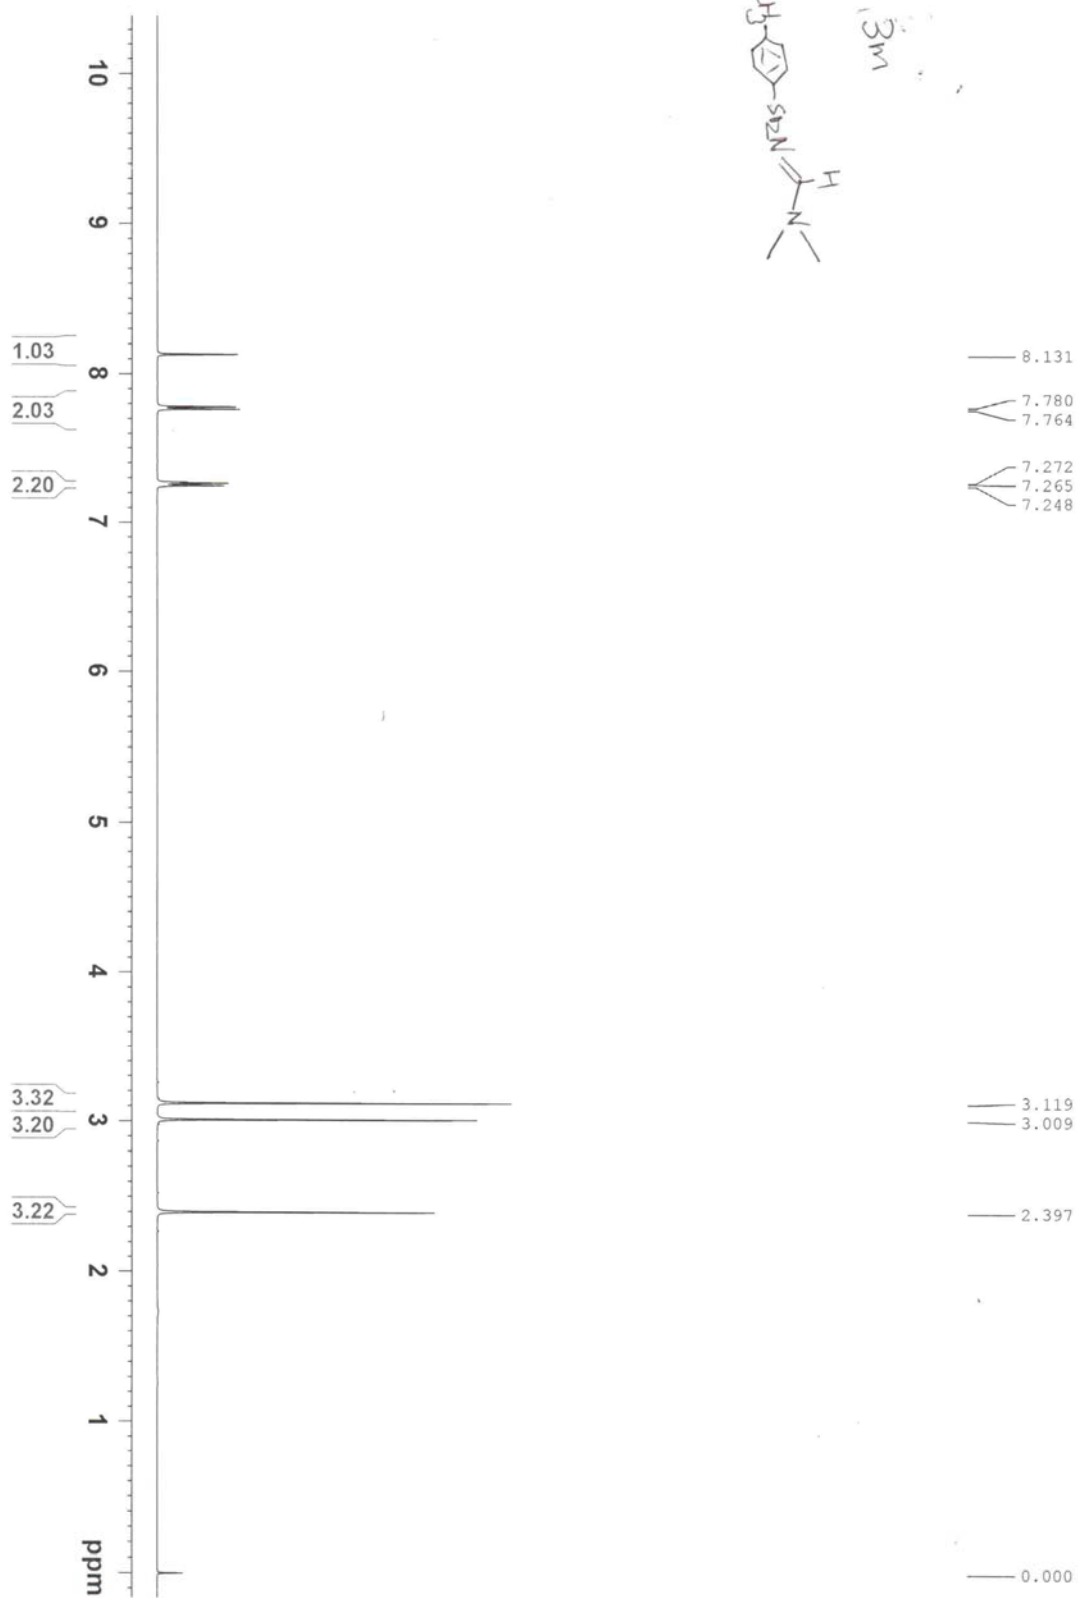

XX-34 CDCl<sub>3</sub>

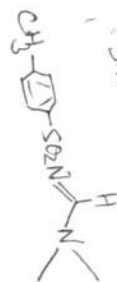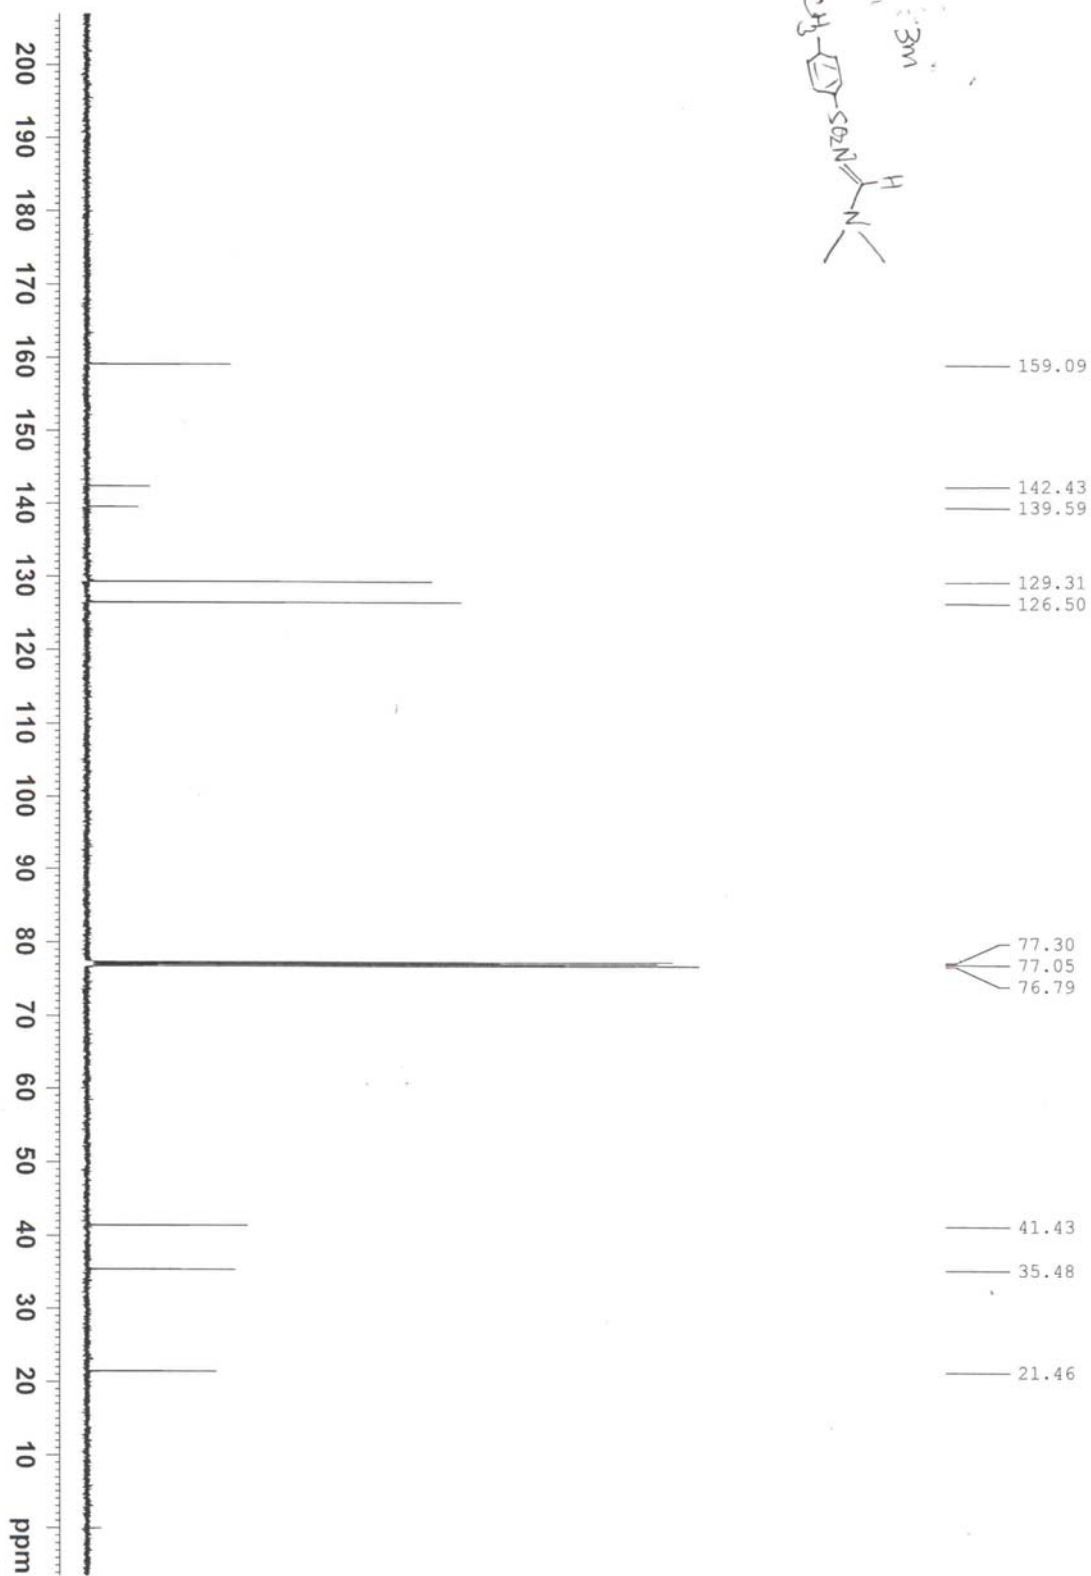

xx-132 CDCl<sub>3</sub>

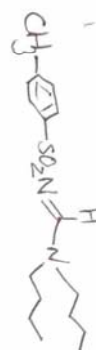

8.142  
7.757  
7.753  
7.750  
7.739  
7.737  
7.733  
7.332  
7.251  
7.235

3.404  
3.389  
3.374  
3.309  
3.295  
3.280  
2.384  
1.577  
1.565  
1.562  
1.557  
1.547  
1.524  
1.521  
1.517  
1.510  
1.506  
1.500  
1.493  
1.490  
1.487  
1.310  
1.295  
1.279  
1.267  
1.264  
1.252  
1.237  
1.222  
0.936  
0.922  
0.907  
0.870  
0.856  
0.841  
0.000

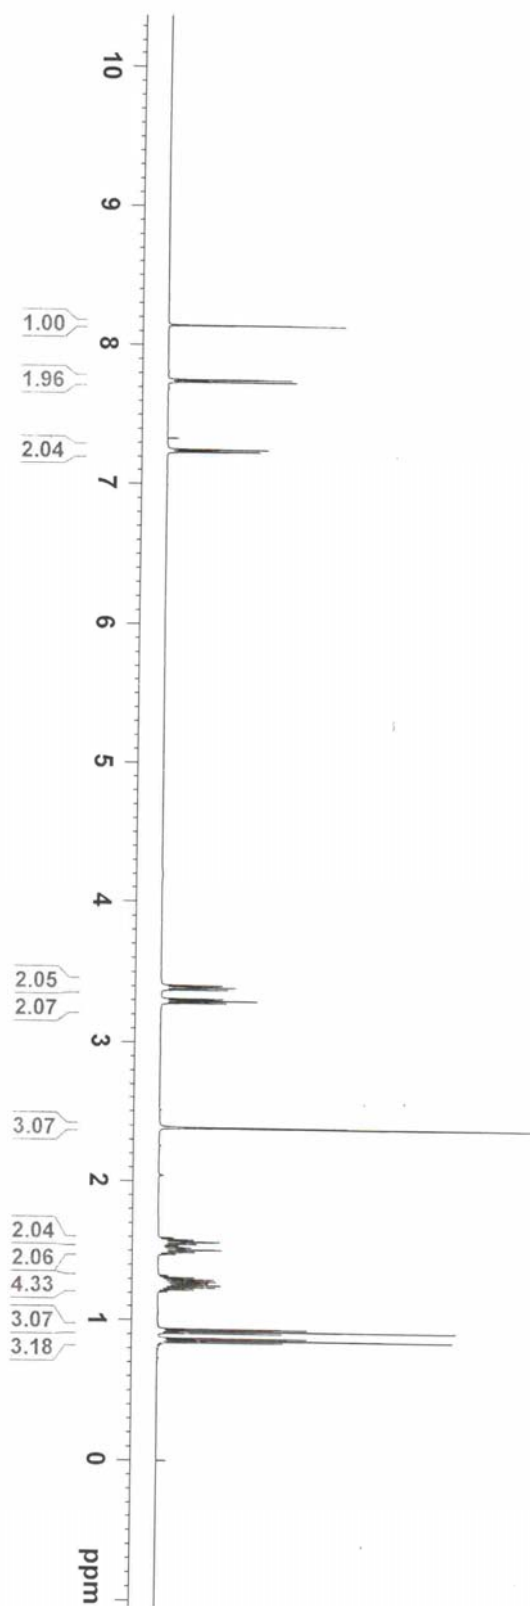



xx-132 CDCl<sub>3</sub>

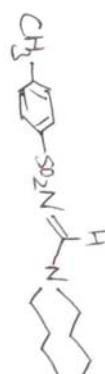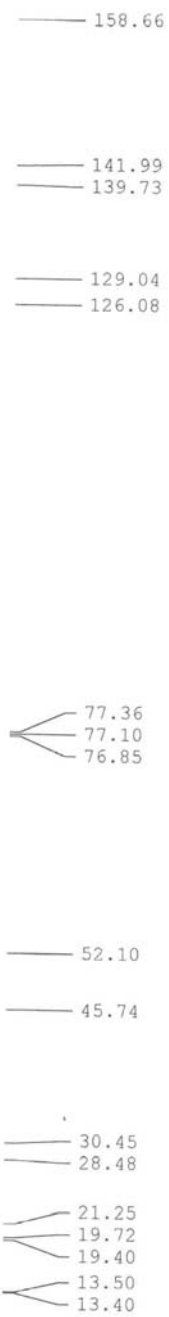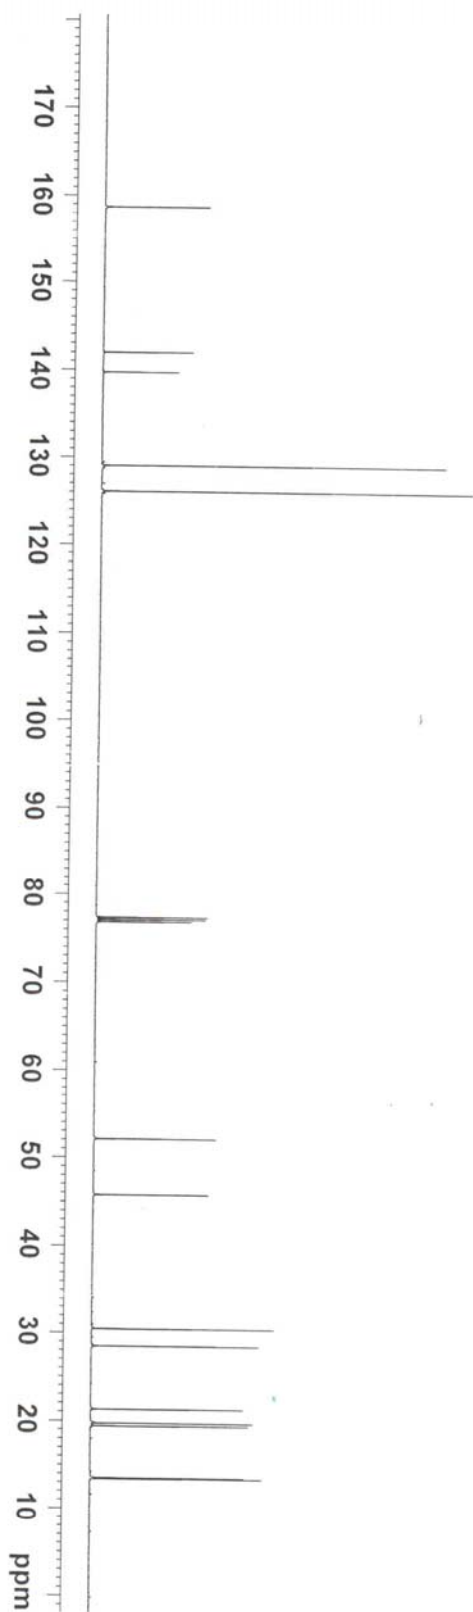

XX-29 CDCl<sub>3</sub>

30

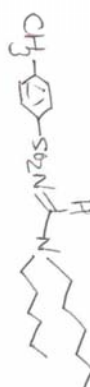

8.130  
7.757  
7.753  
7.750  
7.740  
7.736  
7.733  
7.293  
7.246  
7.230

3.398  
3.383  
3.368  
3.294  
3.279  
3.265  
2.387  
1.586  
1.573  
1.559  
1.525  
1.511  
1.497  
1.301  
1.298  
1.289  
1.287  
1.279  
1.270  
1.263  
1.259  
1.253  
1.248  
1.232  
1.213  
1.205  
1.187  
0.898  
0.884  
0.870  
0.843  
0.830  
0.816  
0.000

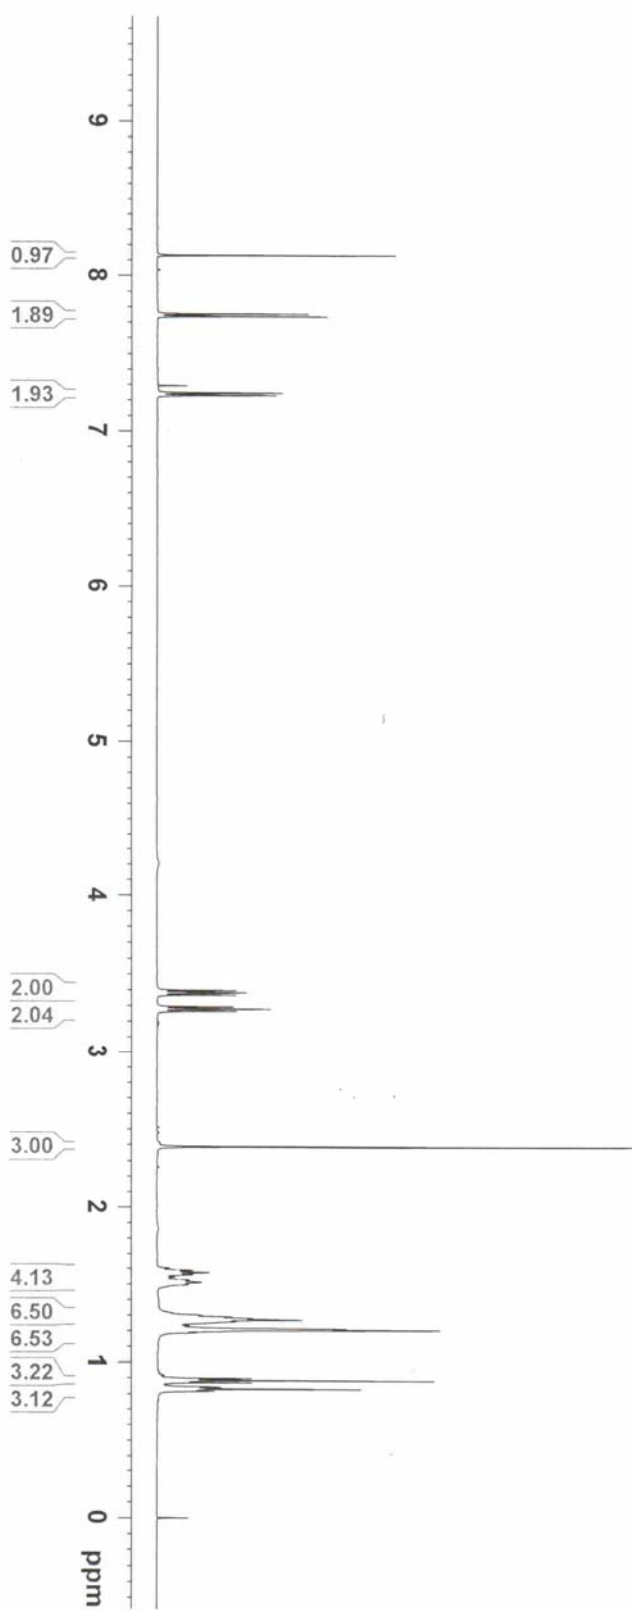

XX-29 CDCl<sub>3</sub>

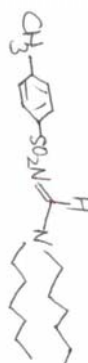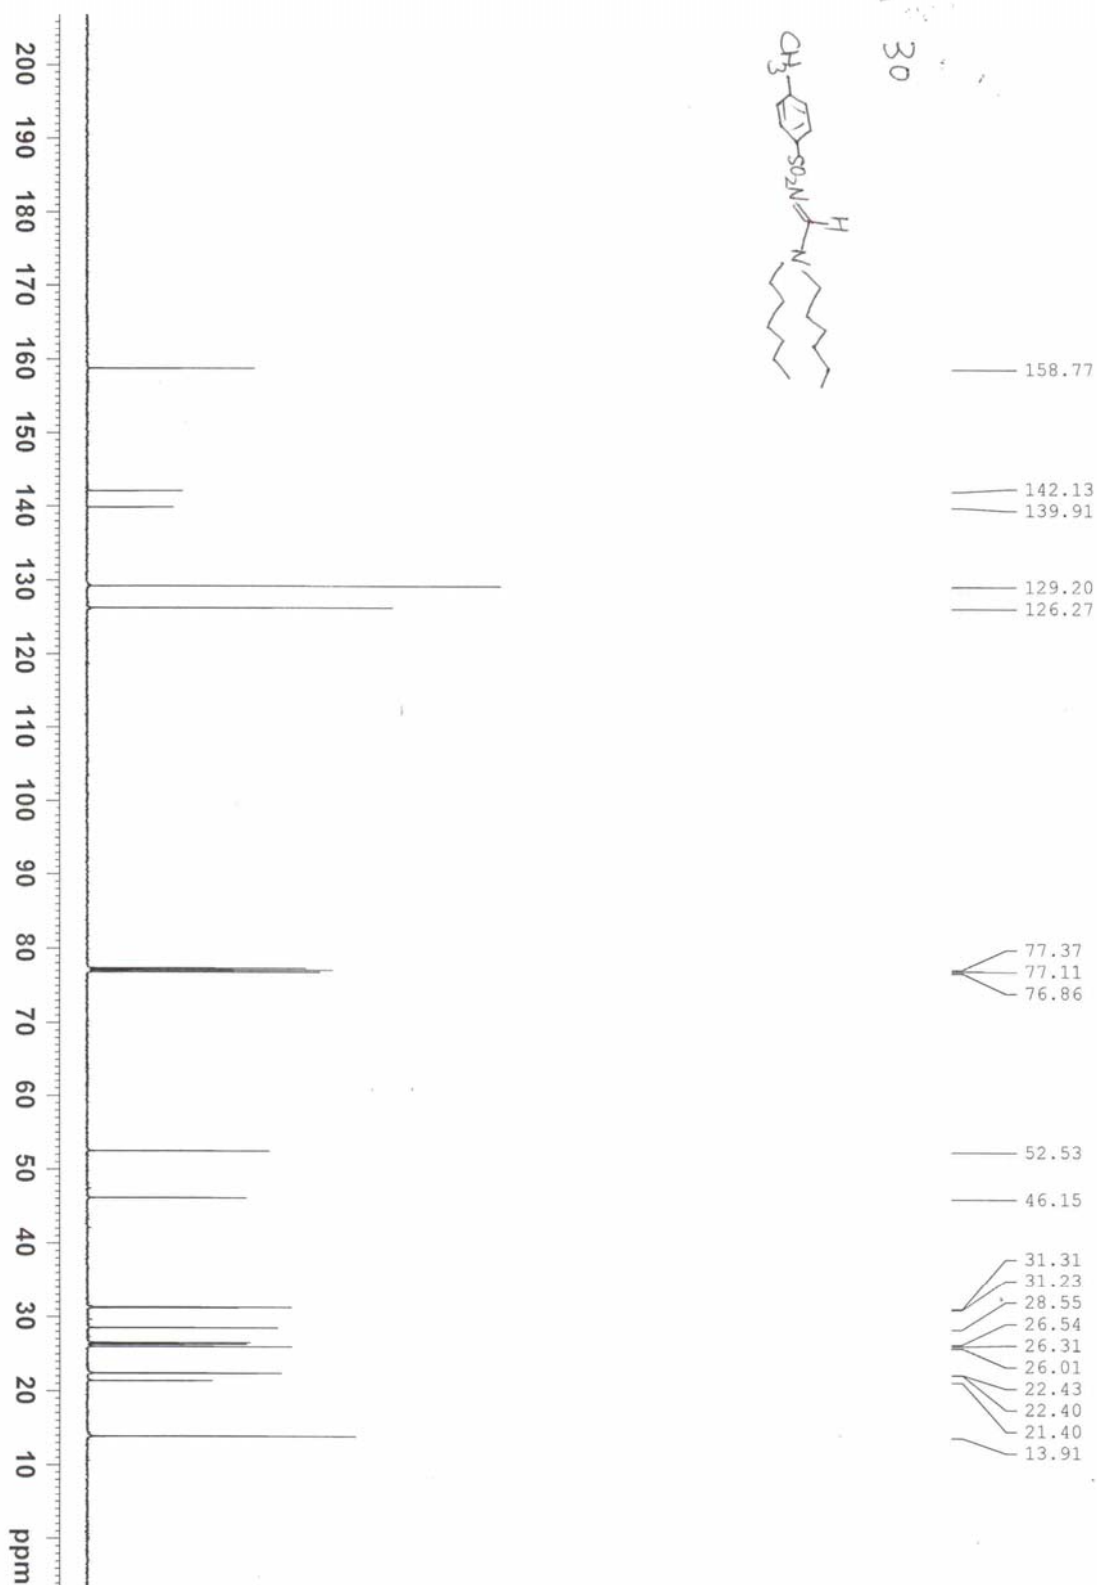

B-2 CDCl<sub>3</sub>

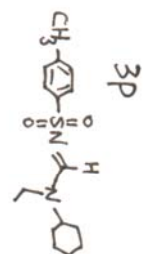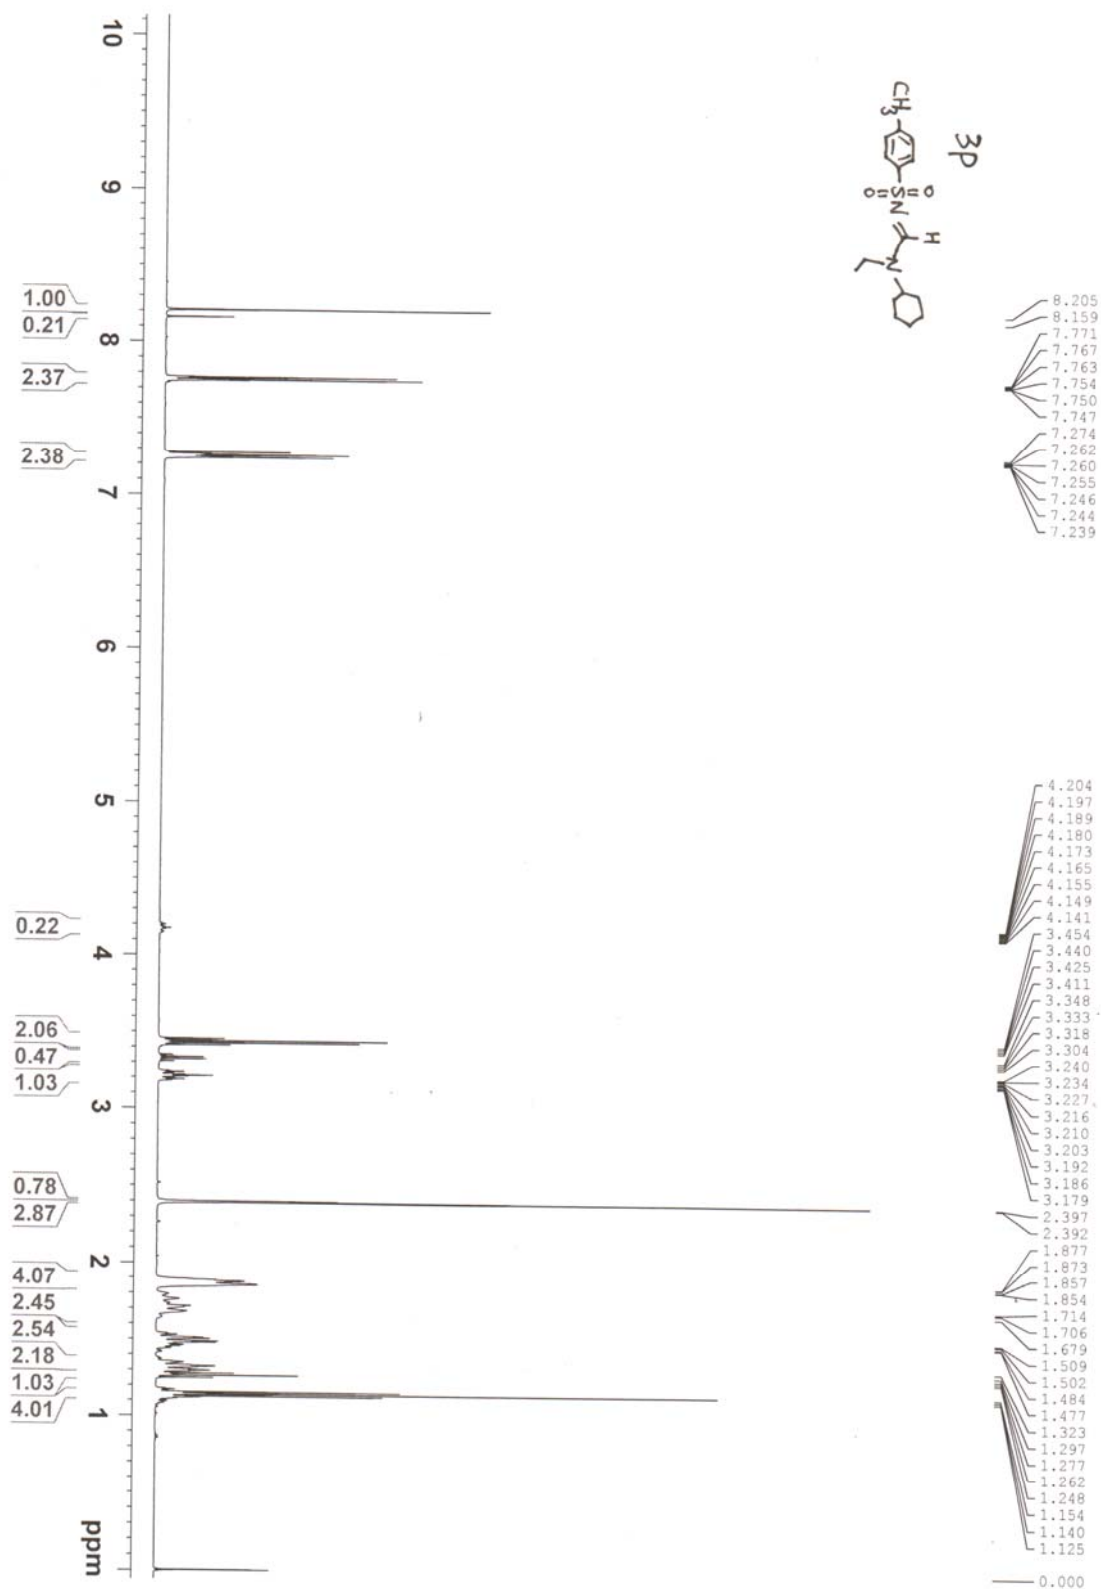

B-2 CDCl<sub>3</sub>

3p

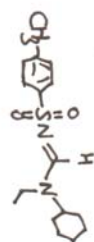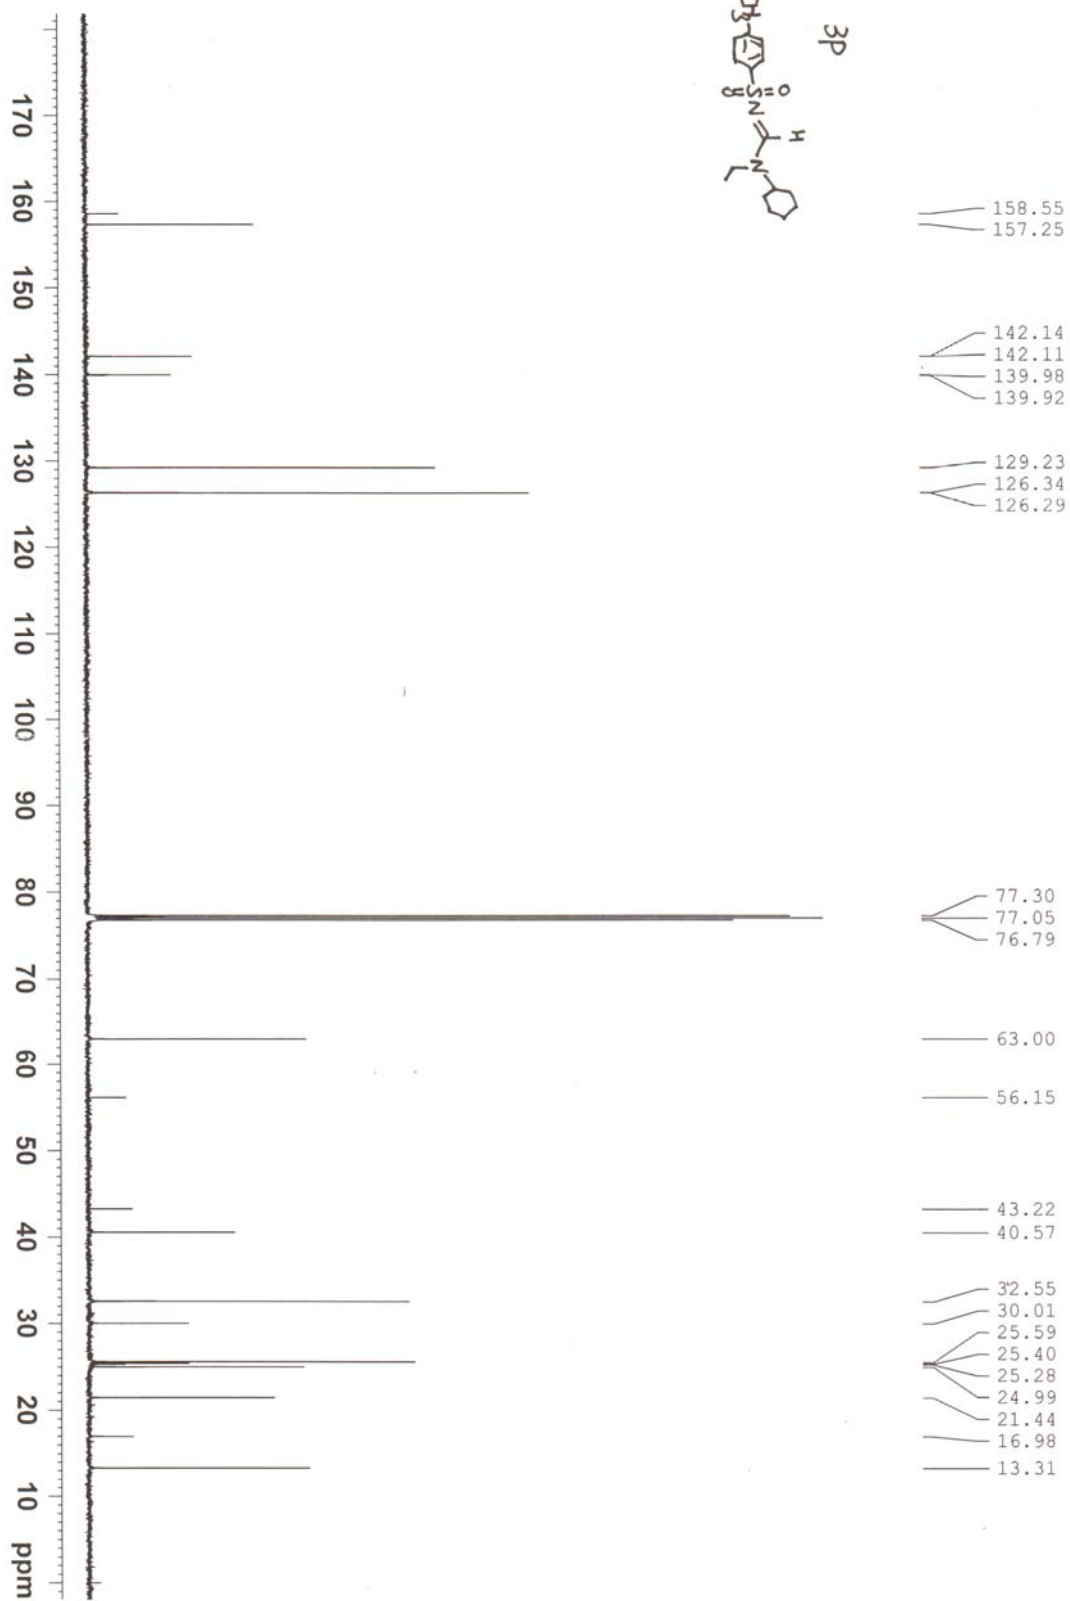

xx-9 CDCl<sub>3</sub>

3a

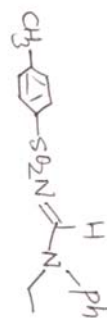

8.452  
7.820  
7.805  
7.445  
7.431  
7.417  
7.357  
7.343  
7.329  
7.291  
7.276  
7.196  
7.181

3.986  
3.973  
3.959  
3.946

2.412

1.188  
1.174  
1.160

0.000

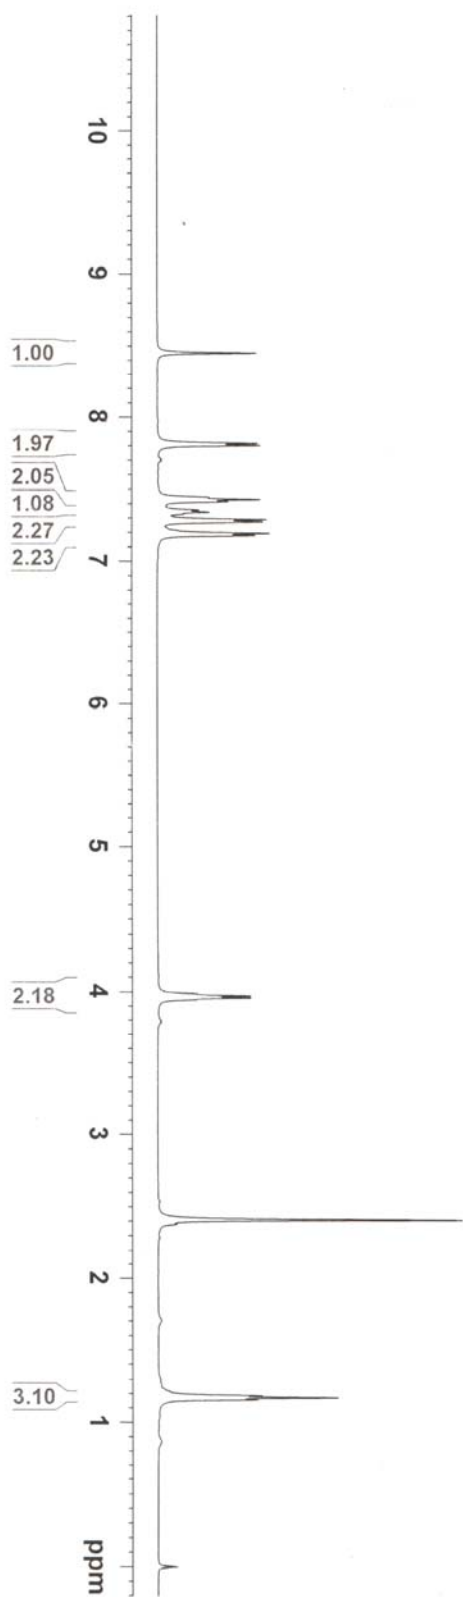

XX-9 CDCl<sub>3</sub>

3a

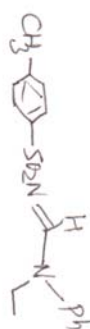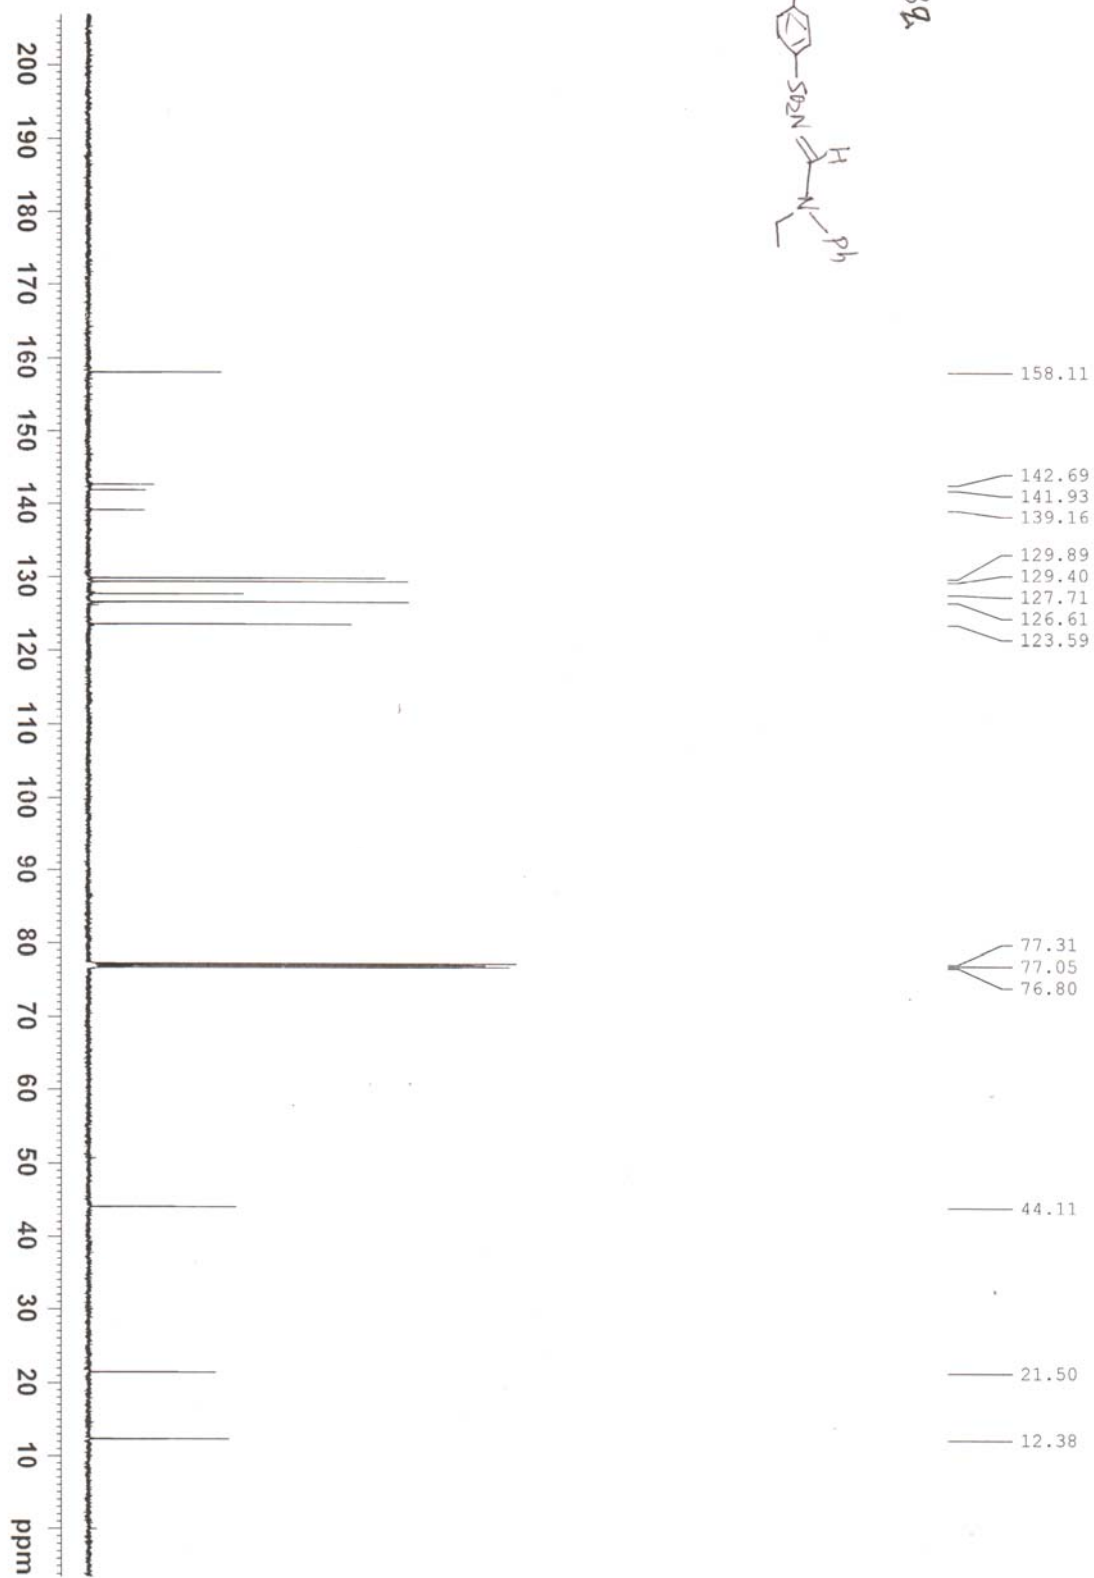

xxx-15 CDCl<sub>3</sub>

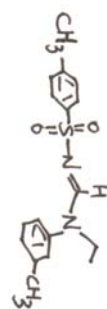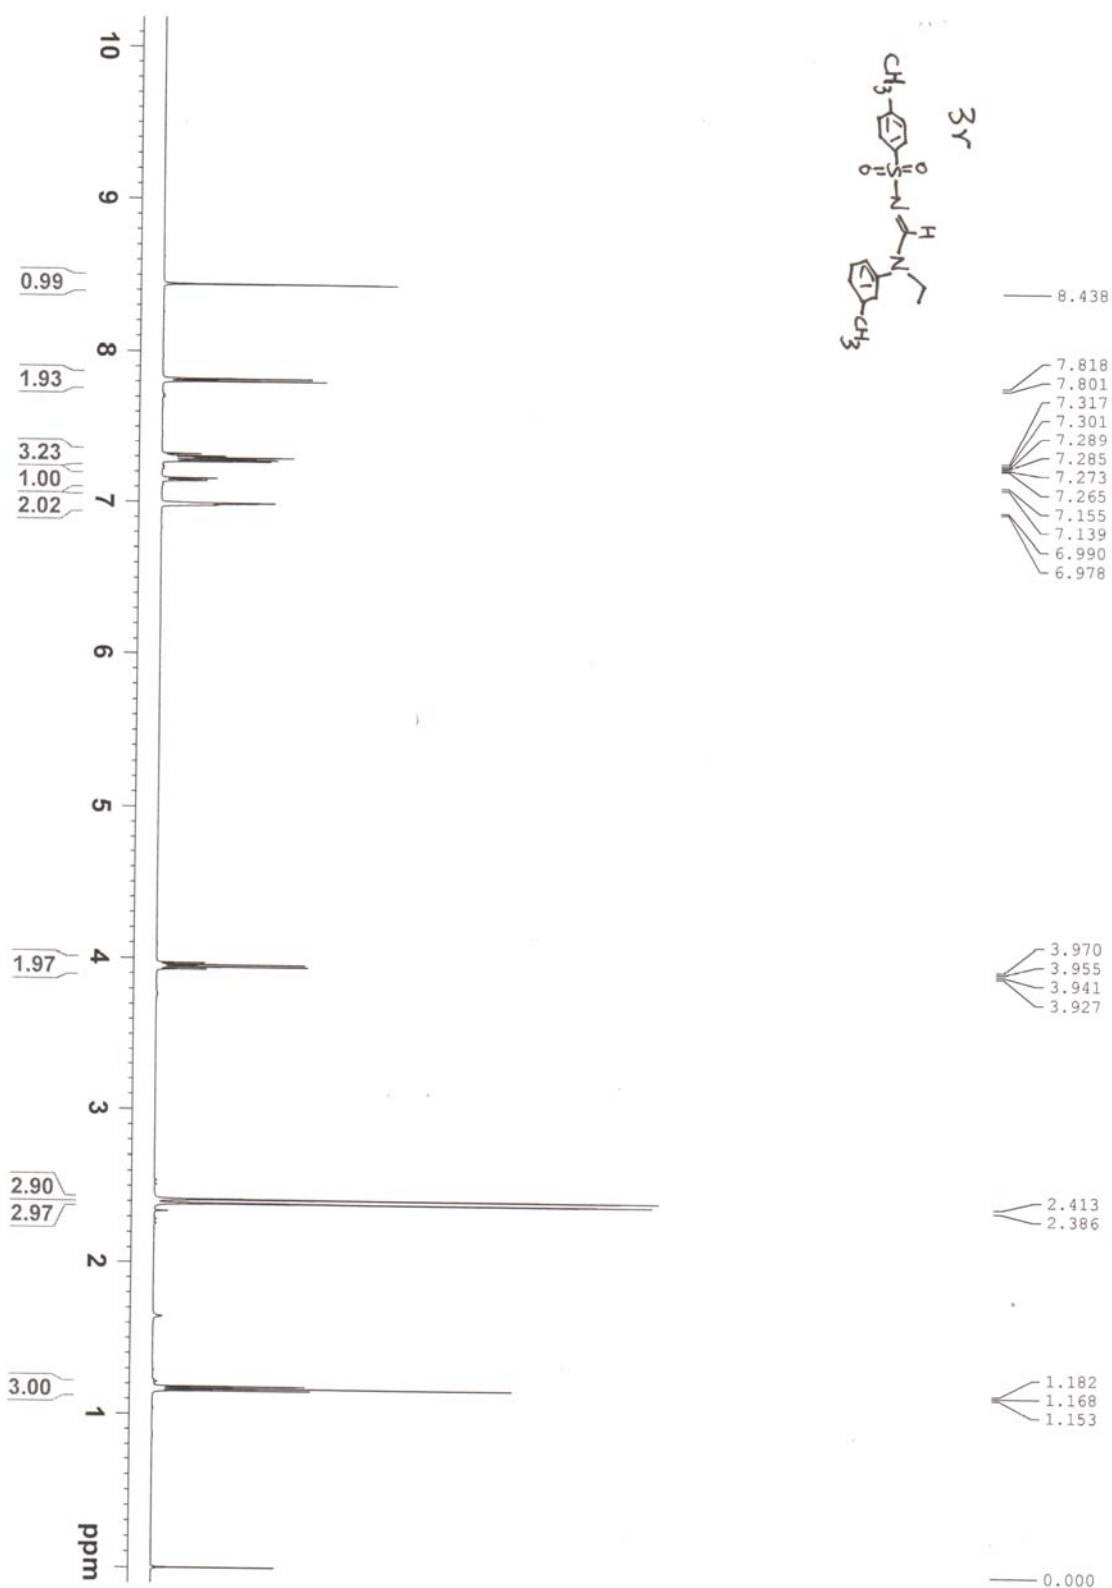



xxx-15 CDCl<sub>3</sub>

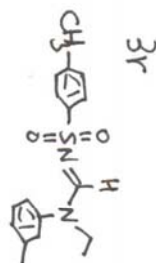

158.06

142.60  
141.85  
140.06  
139.21

129.59  
129.35  
128.43  
126.57  
124.23  
120.54

77.26  
77.00  
76.75

44.04

21.47  
21.32

12.36

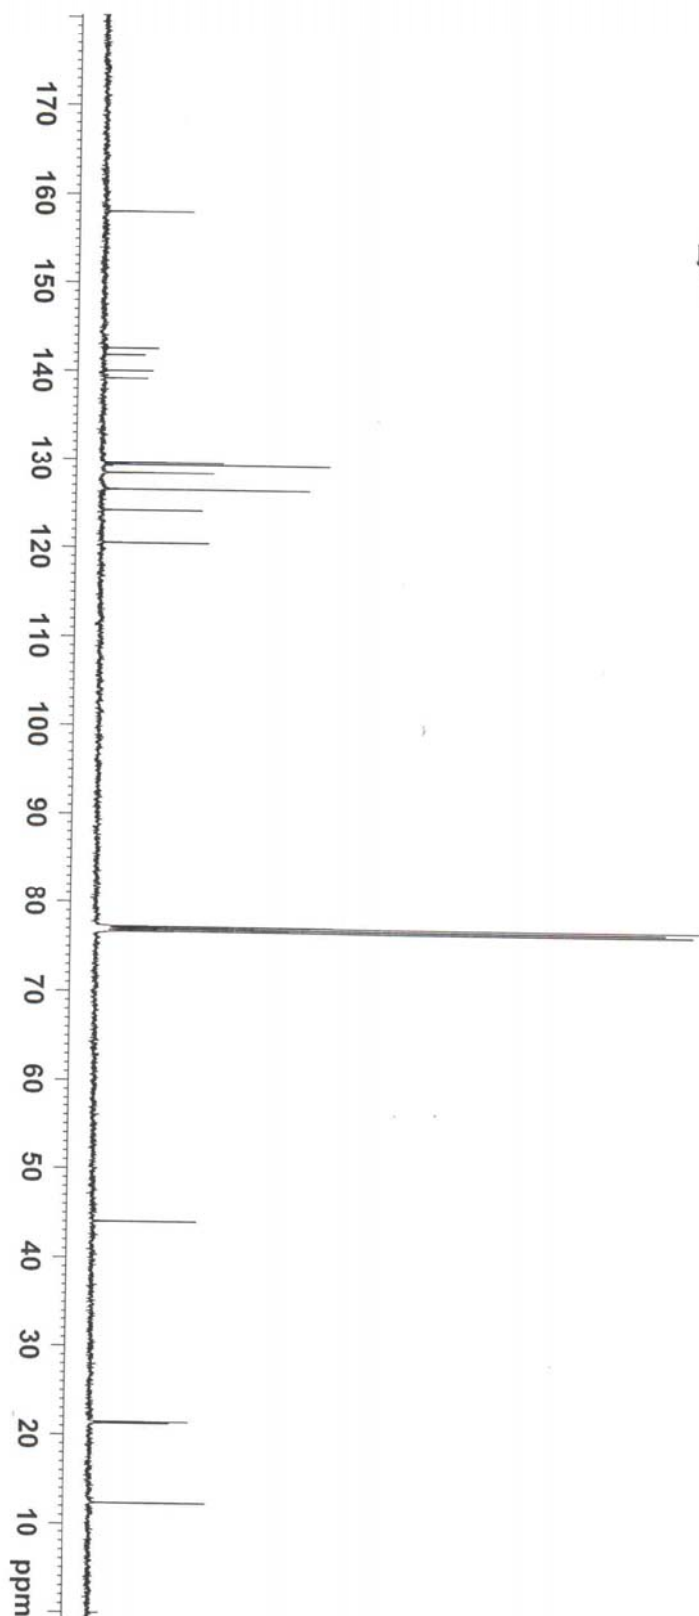

xxx-11 CDCl<sub>3</sub>

3S

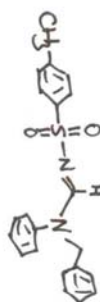

8.625  
7.772  
7.755  
7.367  
7.353  
7.340  
7.337  
7.301  
7.287  
7.266  
7.258  
7.250  
7.211  
7.209  
7.205  
7.197  
7.142  
7.139  
7.124  
7.121  
7.118  
7.109  
7.106

5.106

2.415

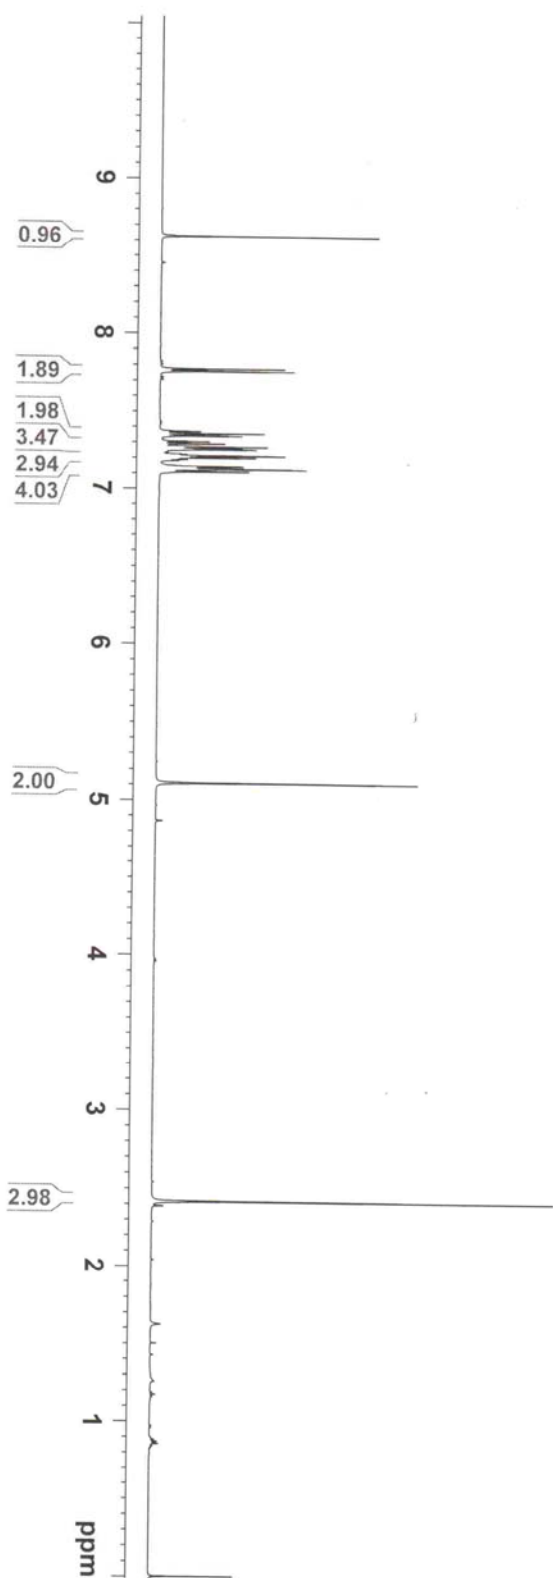

xxx-11 CDCl<sub>3</sub>

35

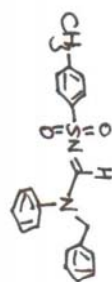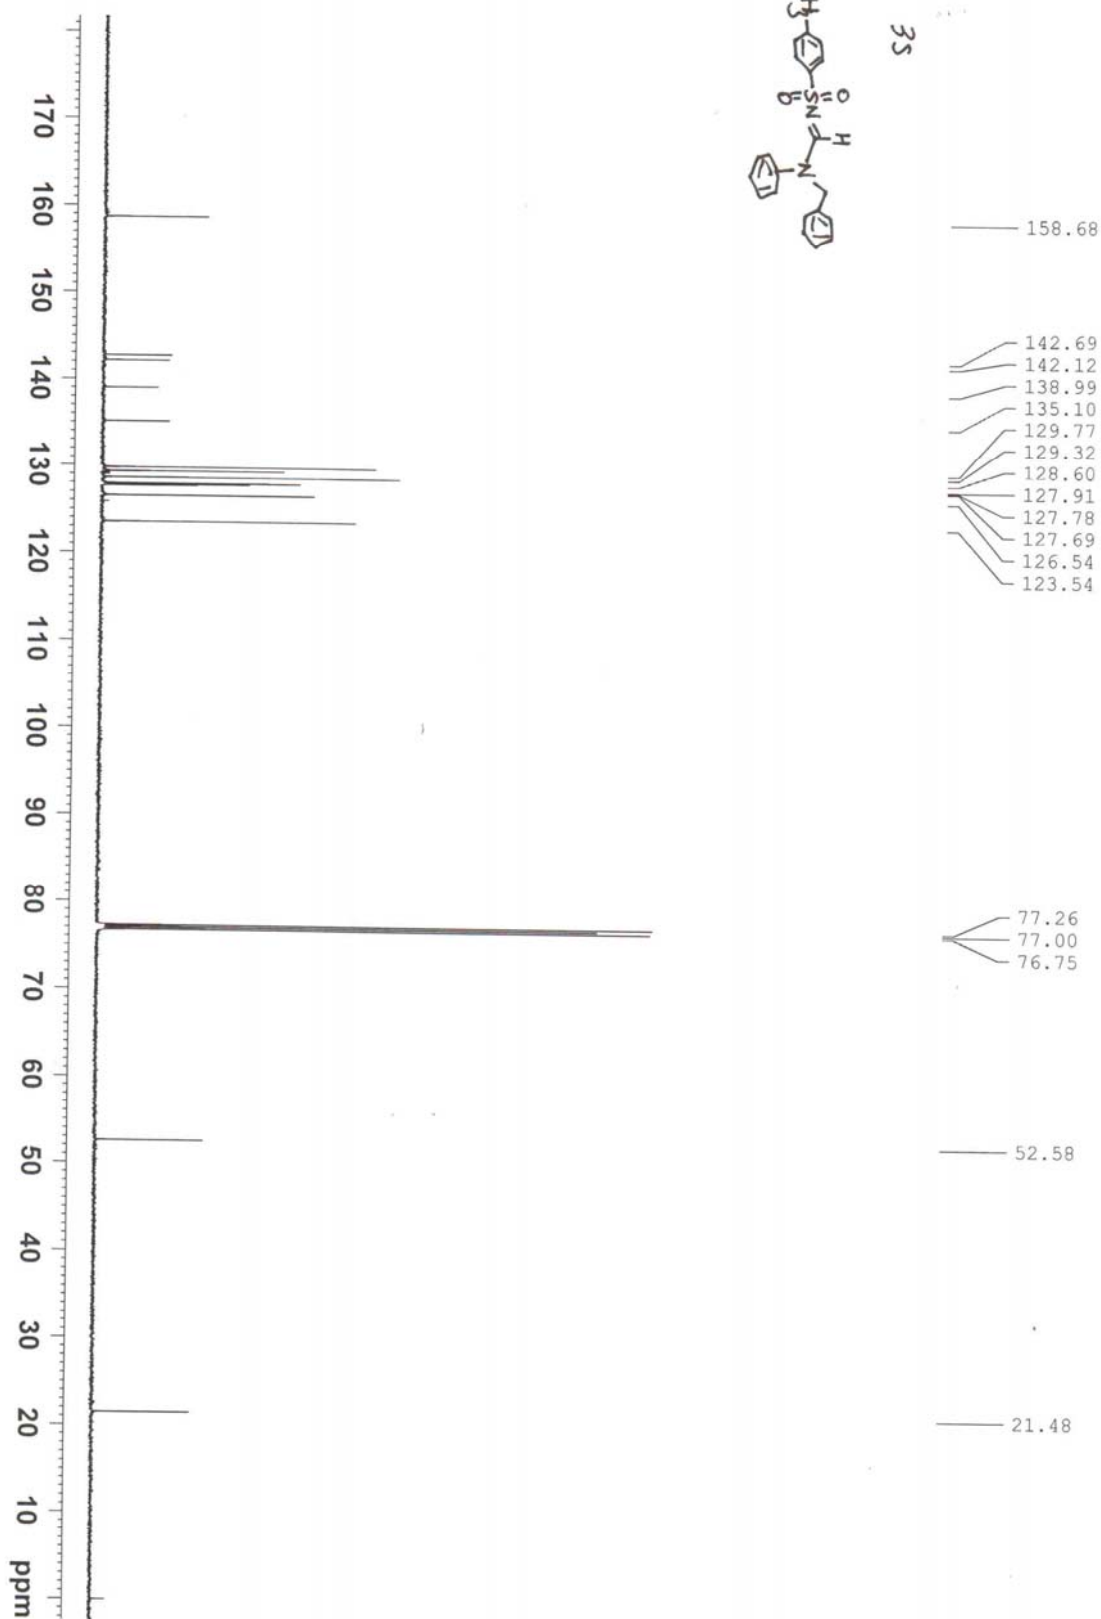

XX-31 CDCl<sub>3</sub>

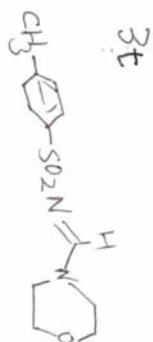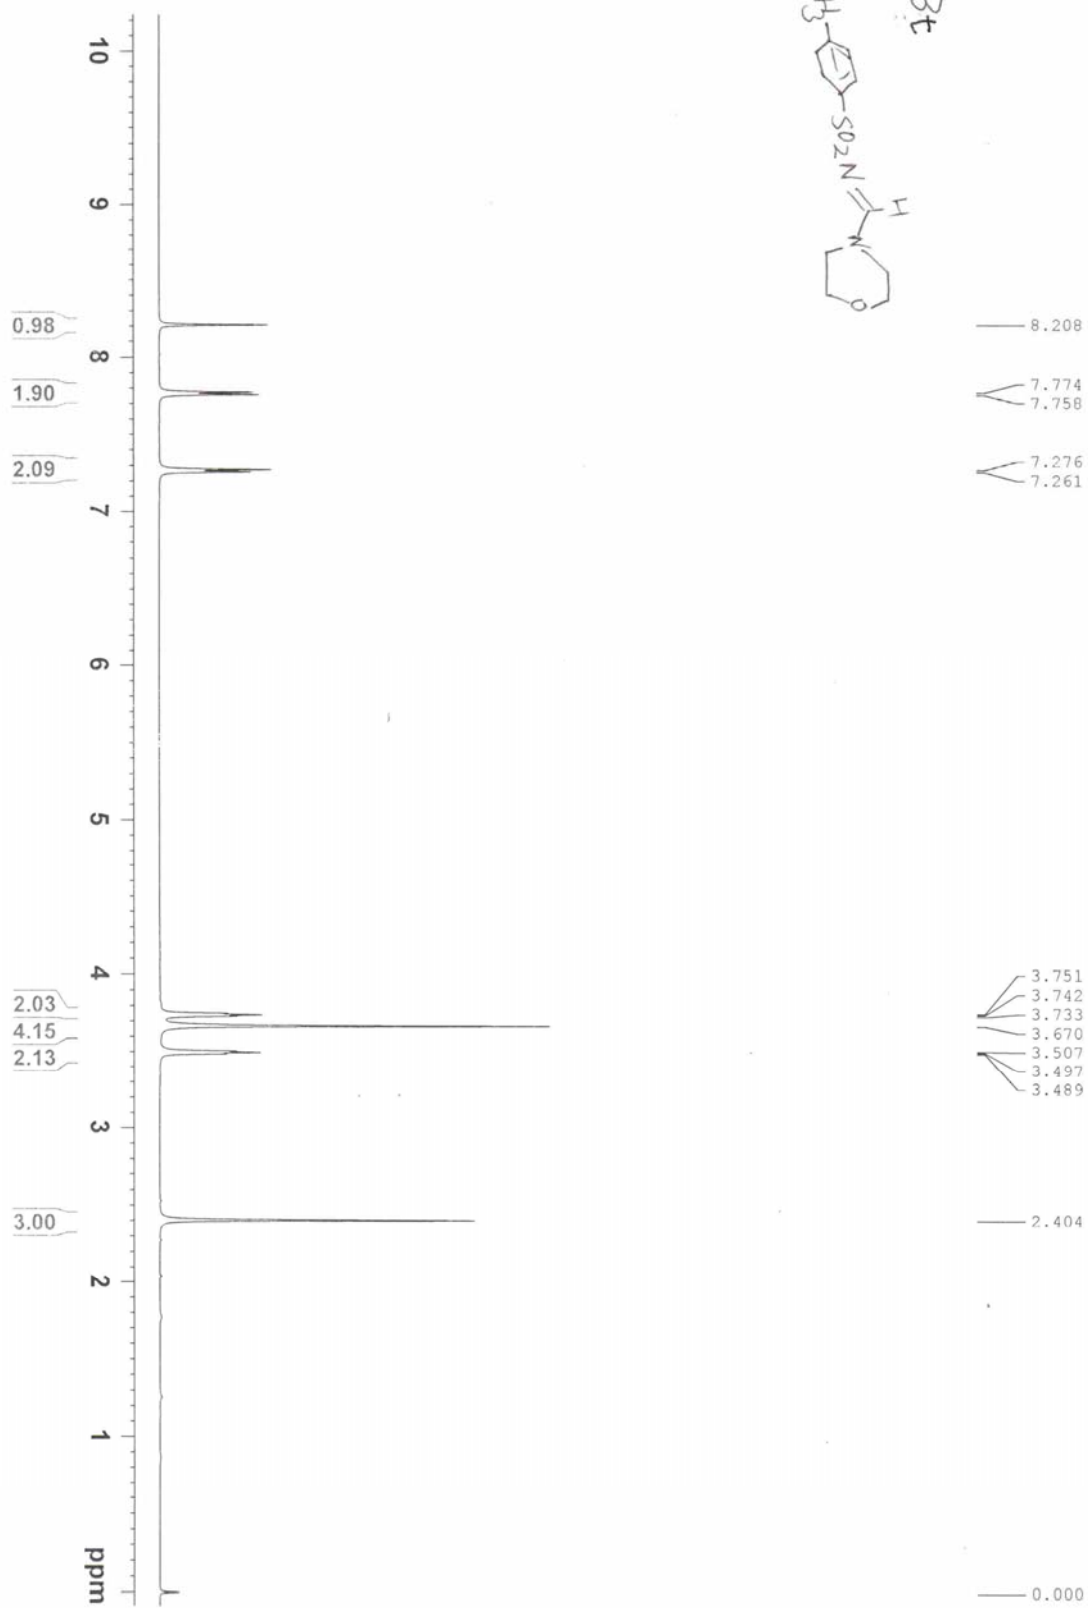

XX-31 CDCl<sub>3</sub>

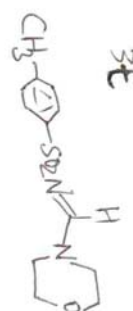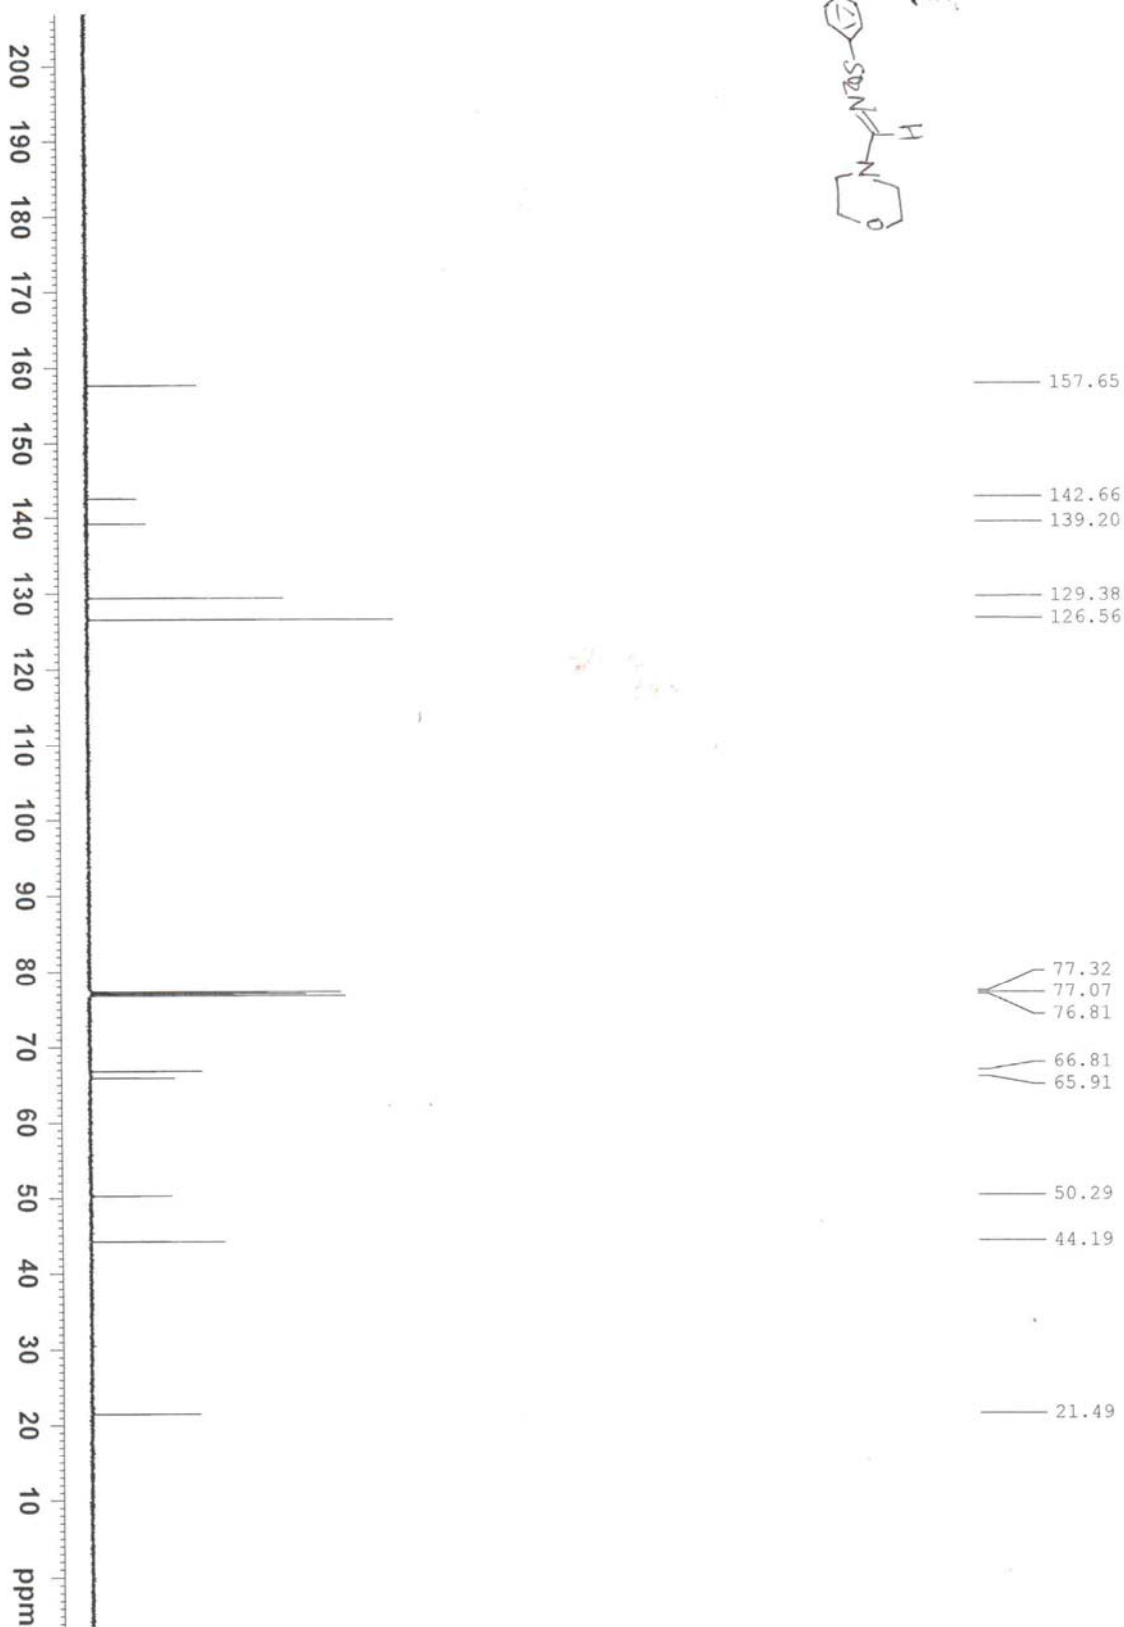

XX-32 CDCl<sub>3</sub>

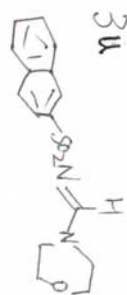

8.465  
8.272  
7.956  
7.937  
7.917  
7.889  
7.873  
7.856  
7.620  
7.607  
7.591  
7.575  
7.561  
7.265

3.744  
3.674  
3.507

0.000

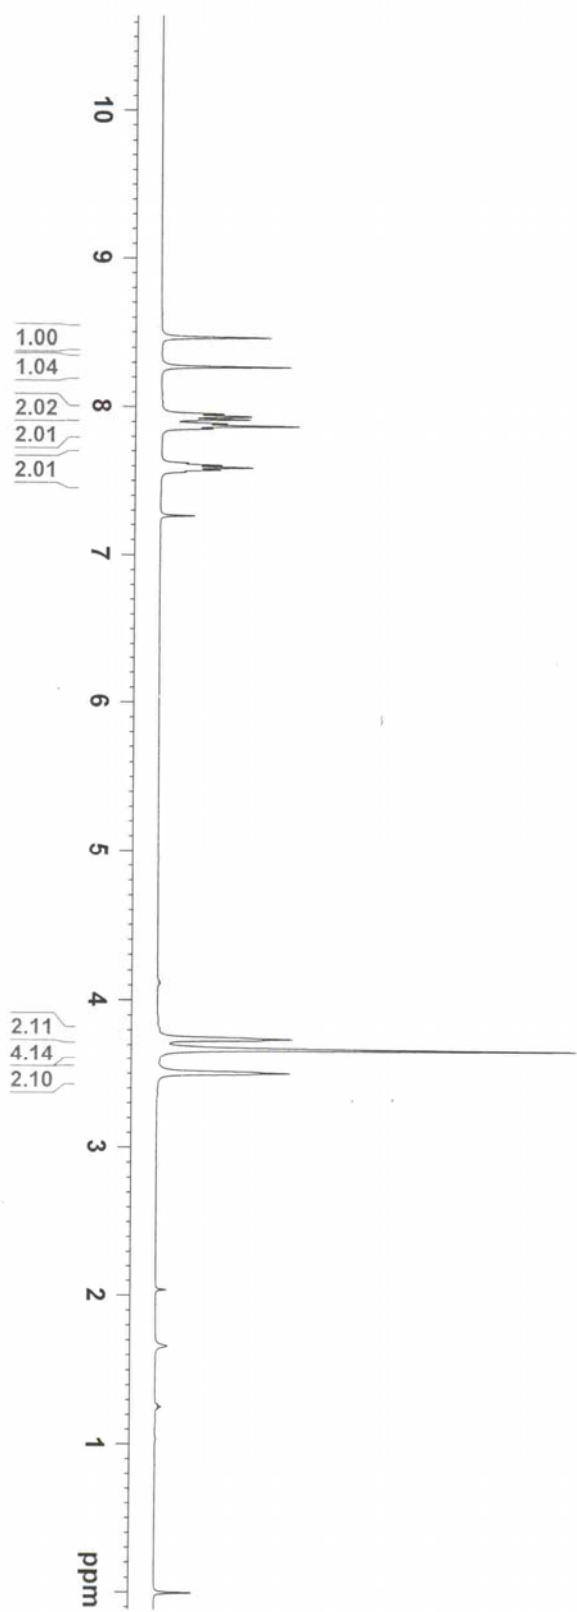

XX-32 CDCl<sub>3</sub>

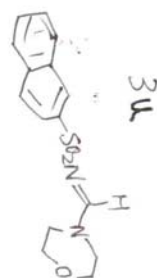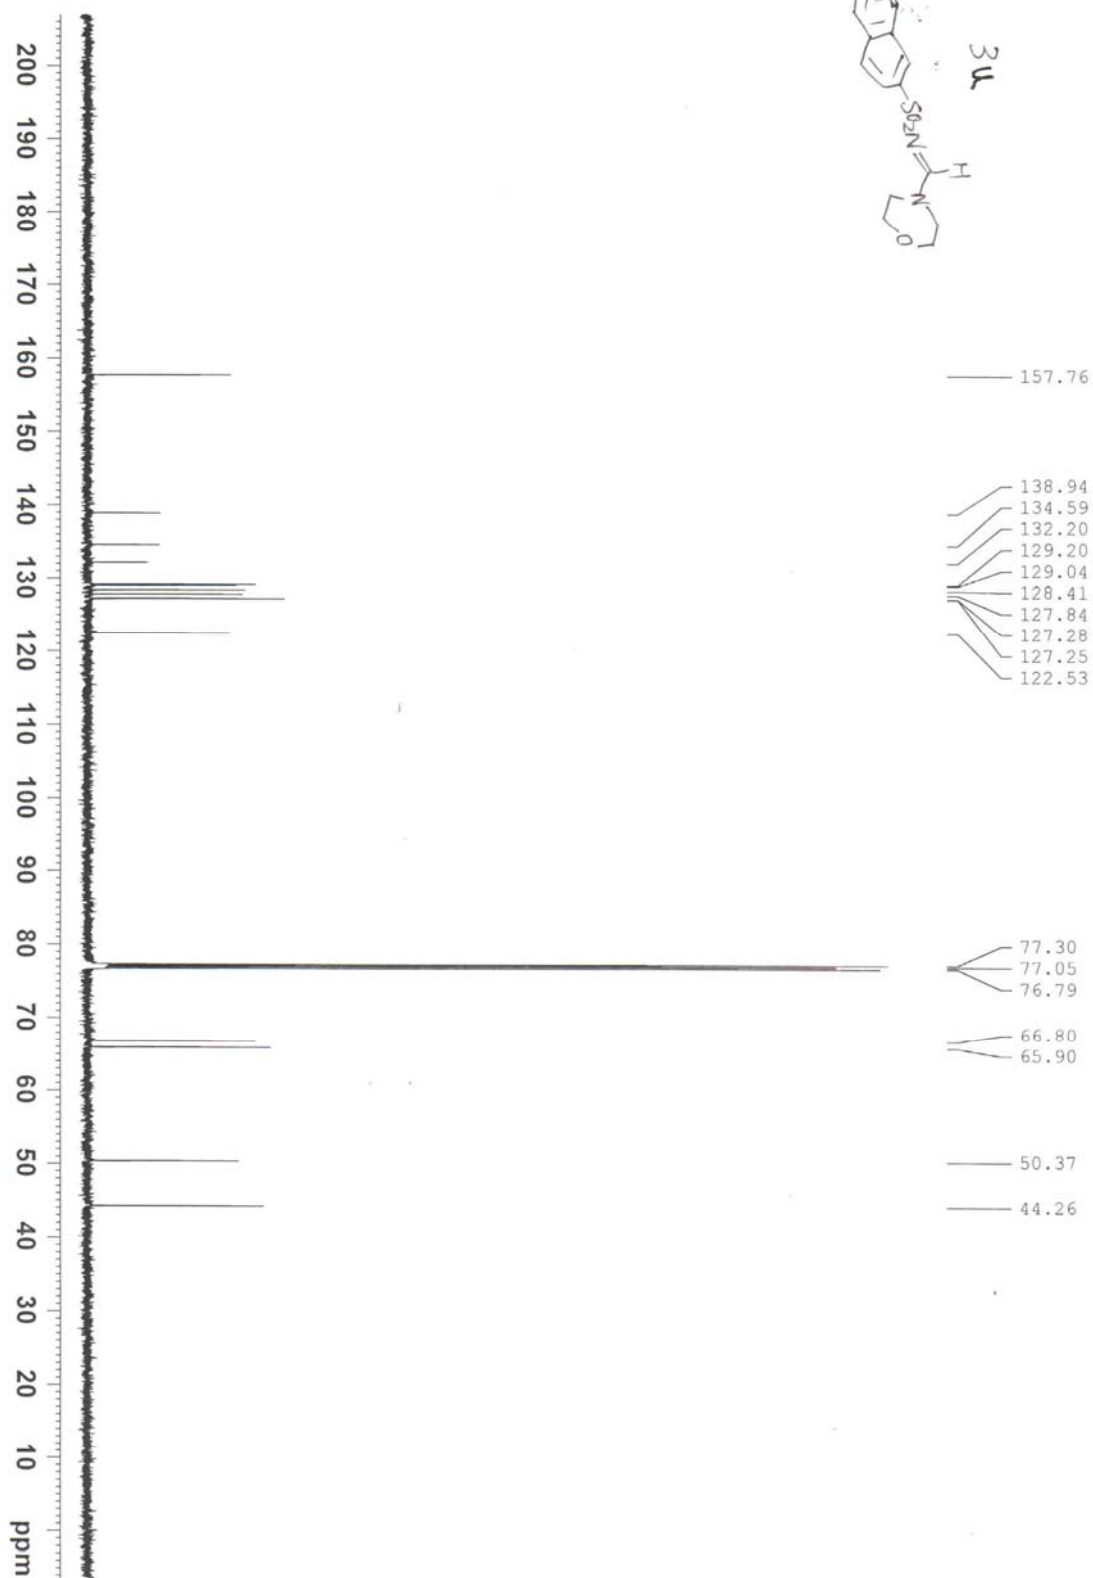

XX-33 CDCl<sub>3</sub>

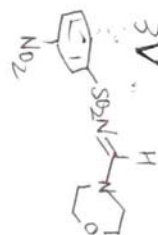

8.694  
8.386  
8.370  
8.258  
8.248  
8.232  
7.719  
7.703  
7.687  
7.280

3.805  
3.796  
3.786  
3.715  
3.587  
3.577  
3.568

0.000

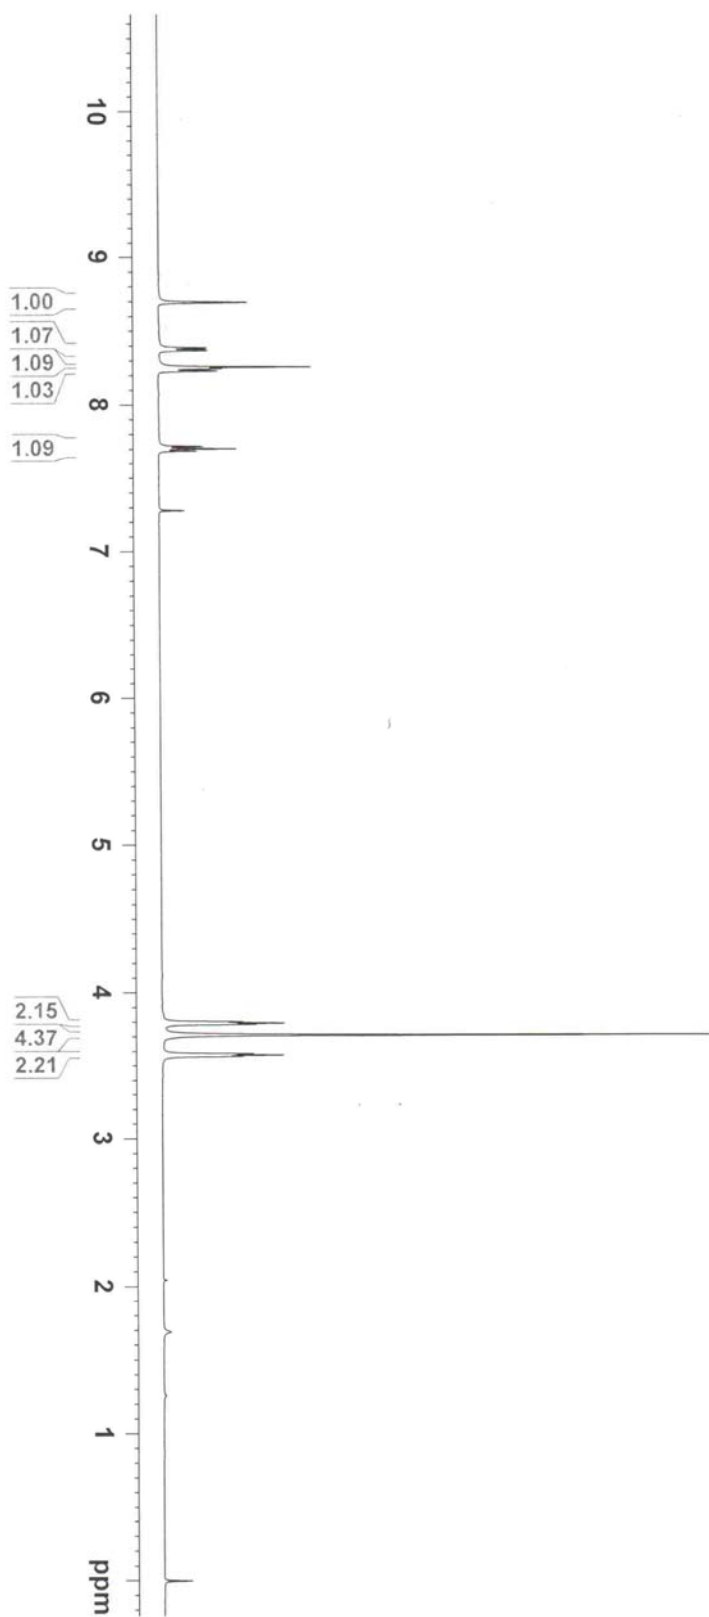



XX-33 CDCl<sub>3</sub>

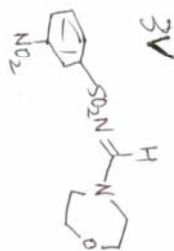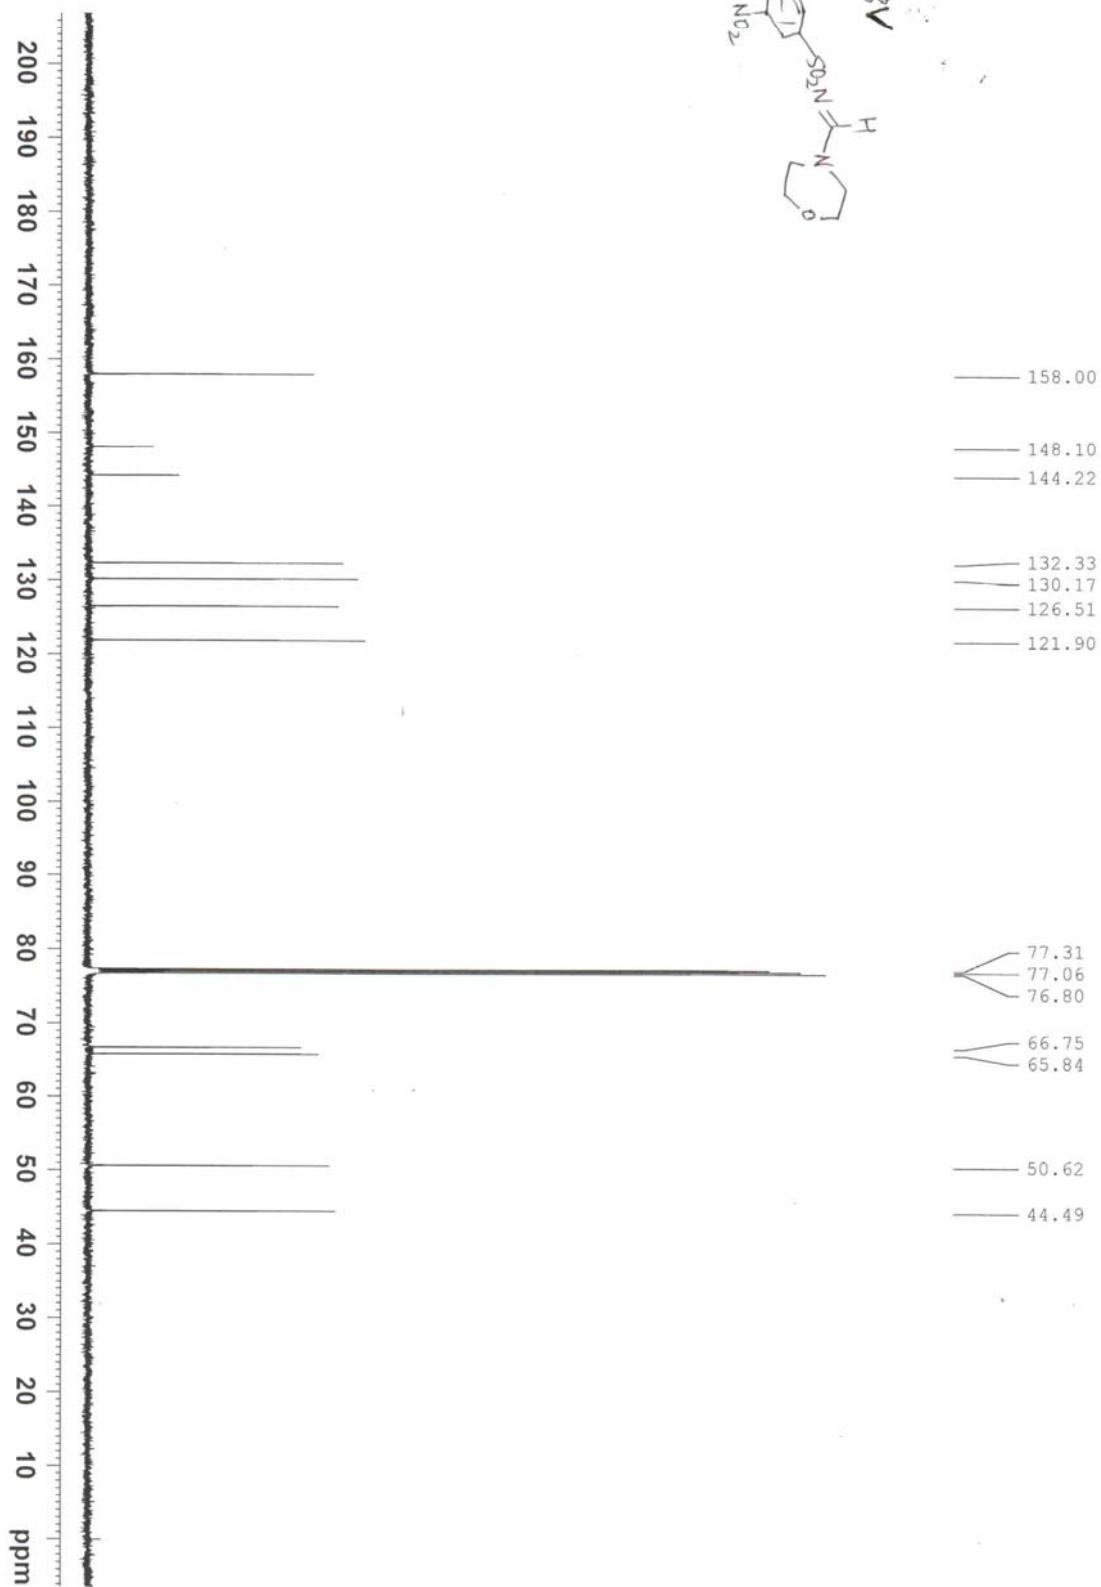

XXX-25 CDCl<sub>3</sub>

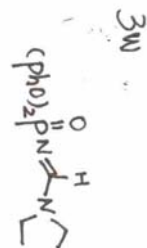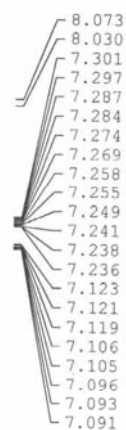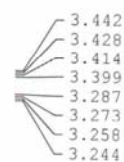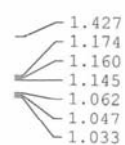

0.000

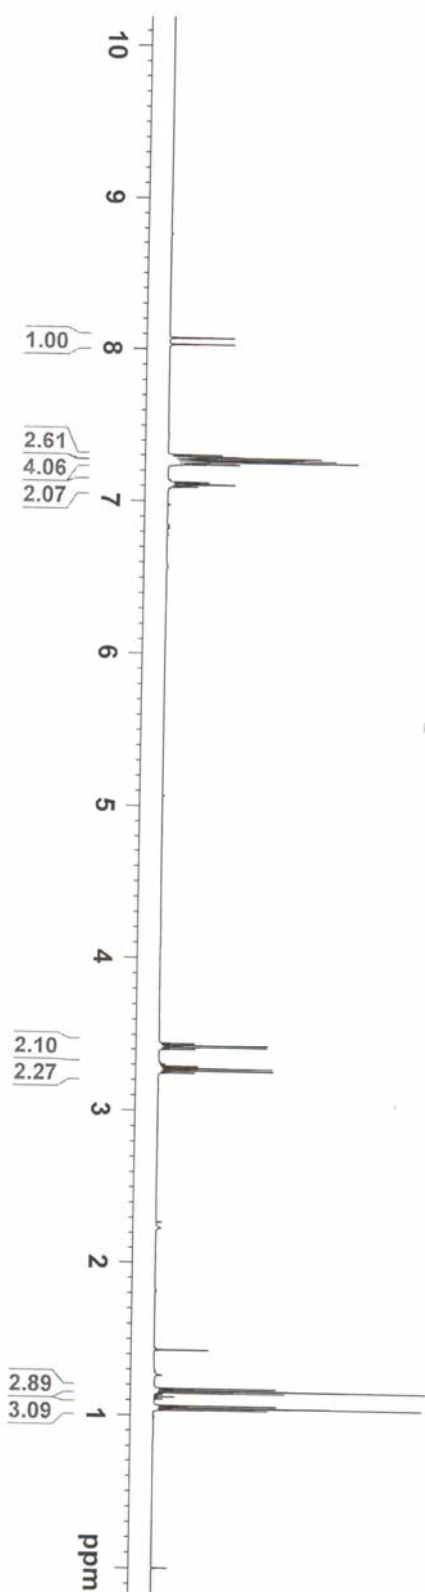

XXX-25 CDCl<sub>3</sub>

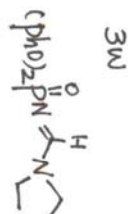

160.03  
159.95

151.50  
151.44

129.38

124.39

120.69  
120.66

77.42  
77.16  
76.91

46.10

39.67

14.53  
11.94

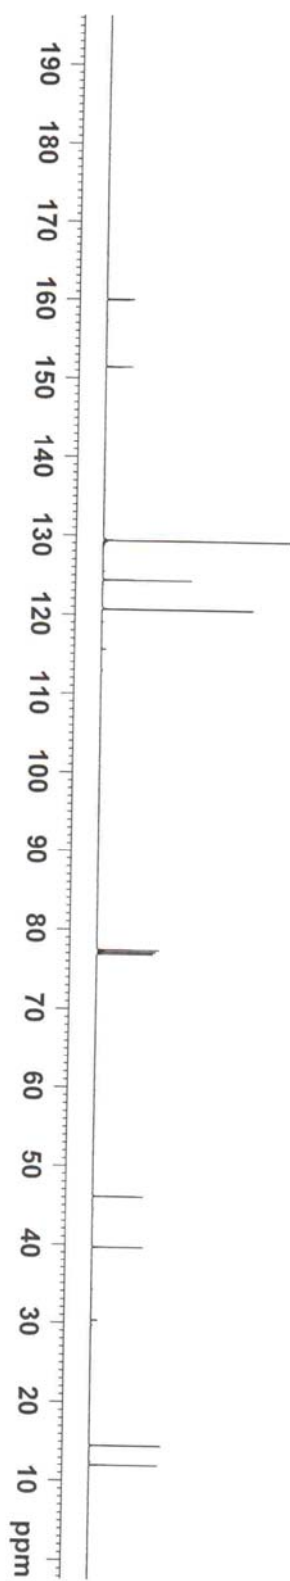

xxx-24-1 CDCl<sub>3</sub>

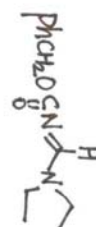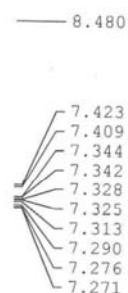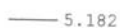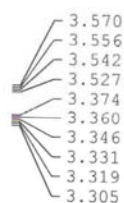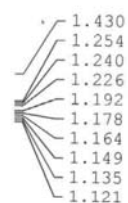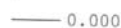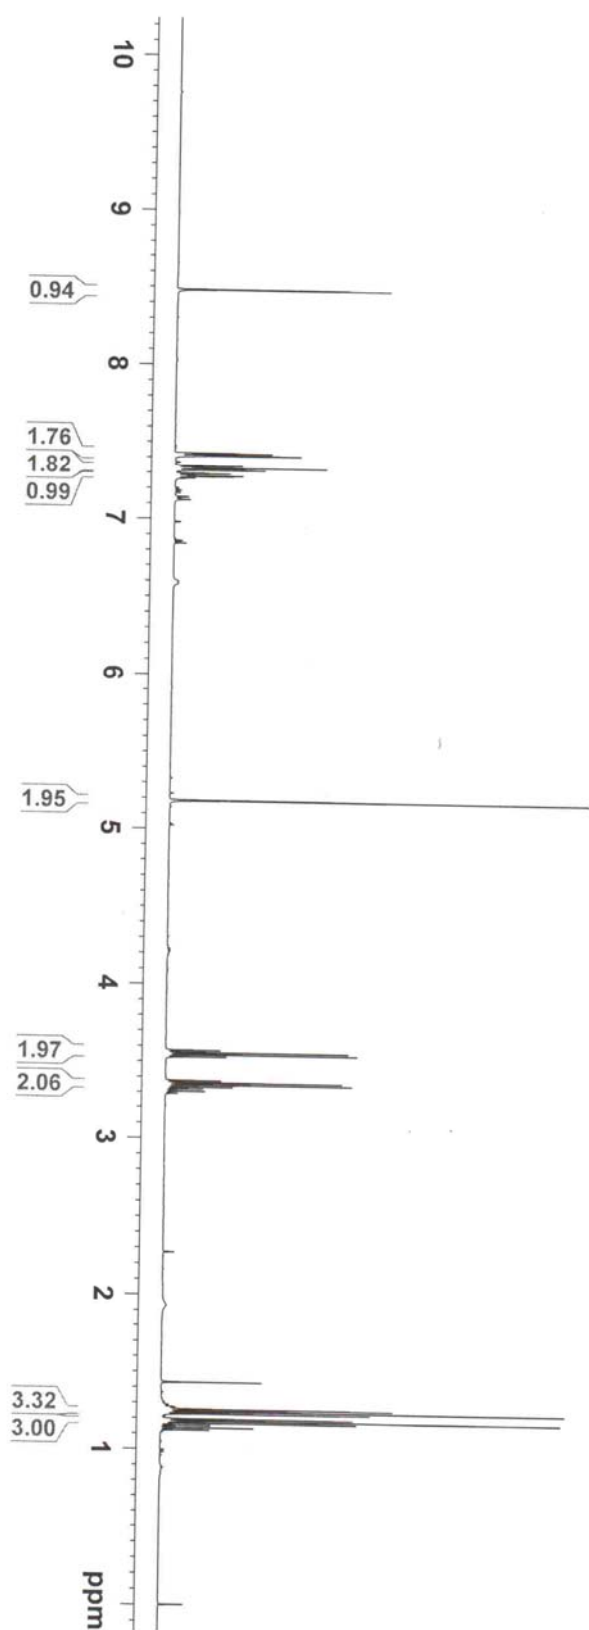

xxx-24-1 CDCl<sub>3</sub>

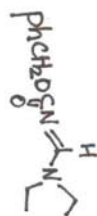

164.69  
162.22

136.92

128.41  
128.32  
127.84

77.34  
77.08  
76.83

67.36

46.75

40.42

14.54  
12.24

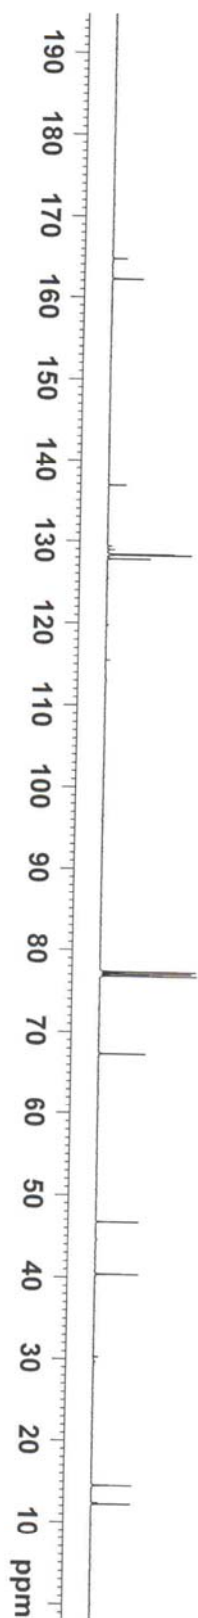

XX-121 CDCl<sub>3</sub>

3Y

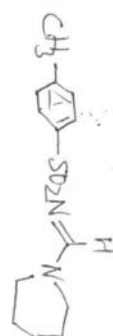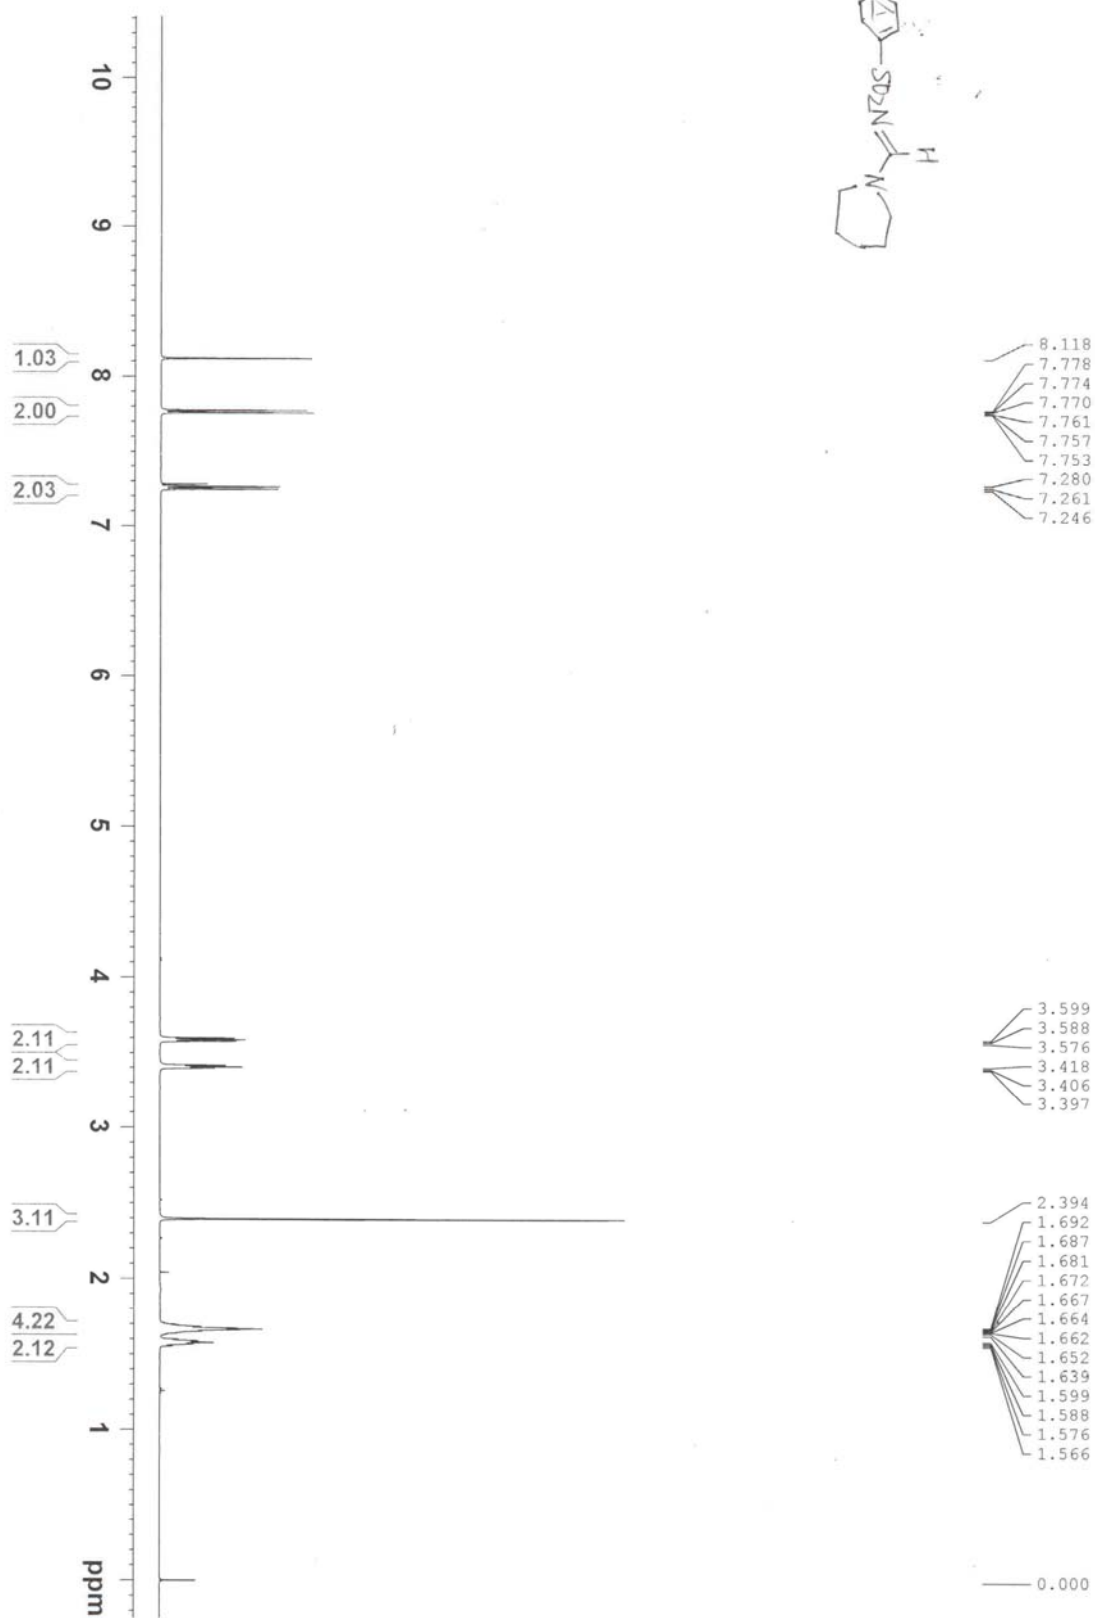

XX-121 CDC13

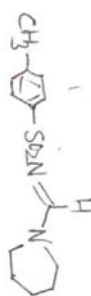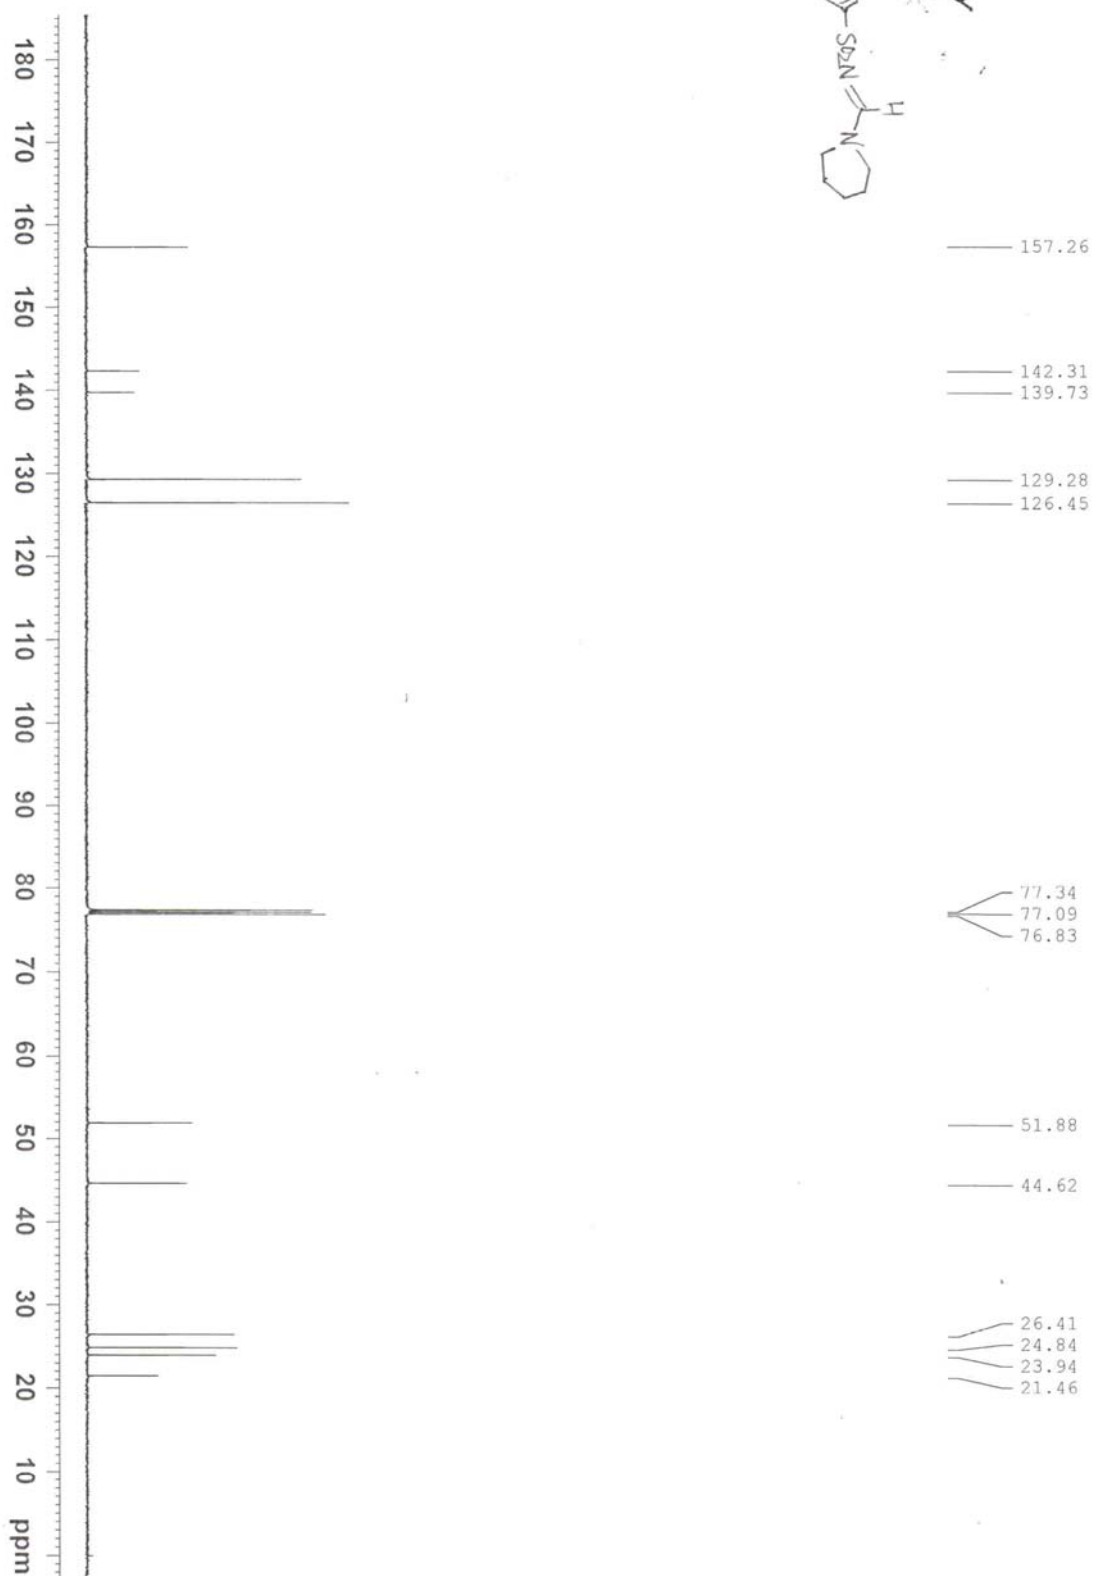

XX-122 CDCl<sub>3</sub>

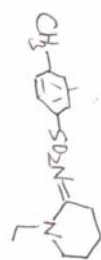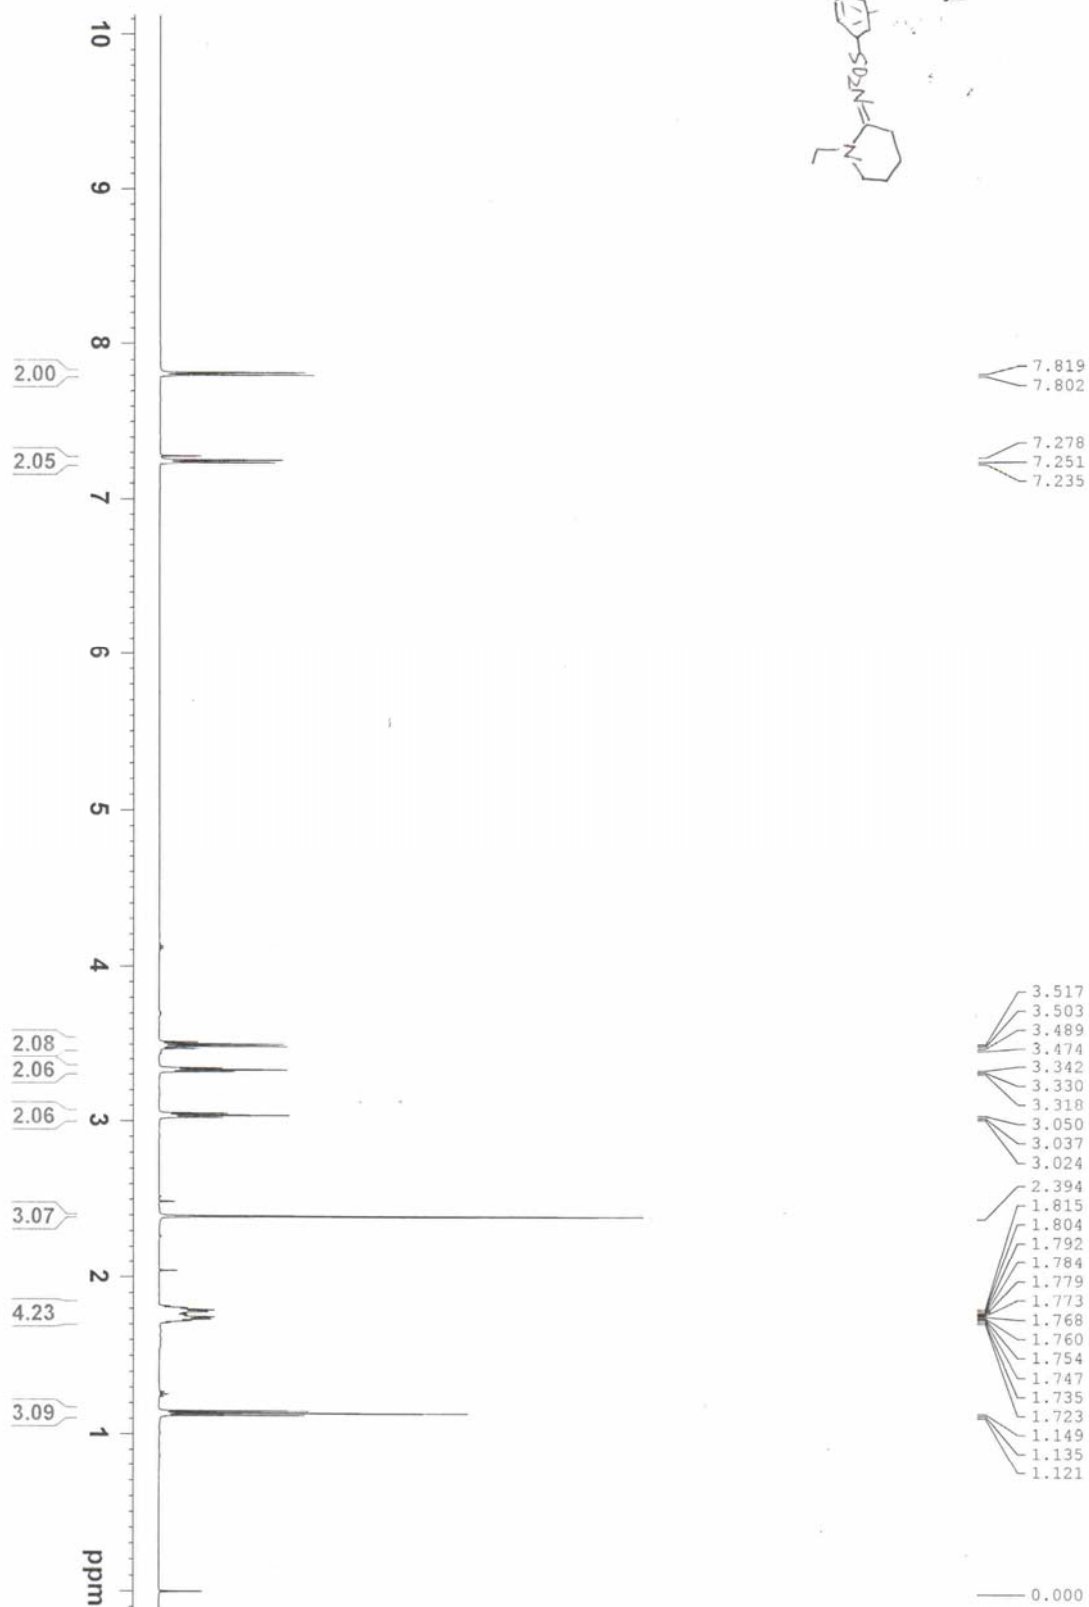



XX-122 CDCl<sub>3</sub>

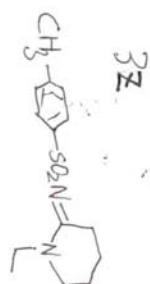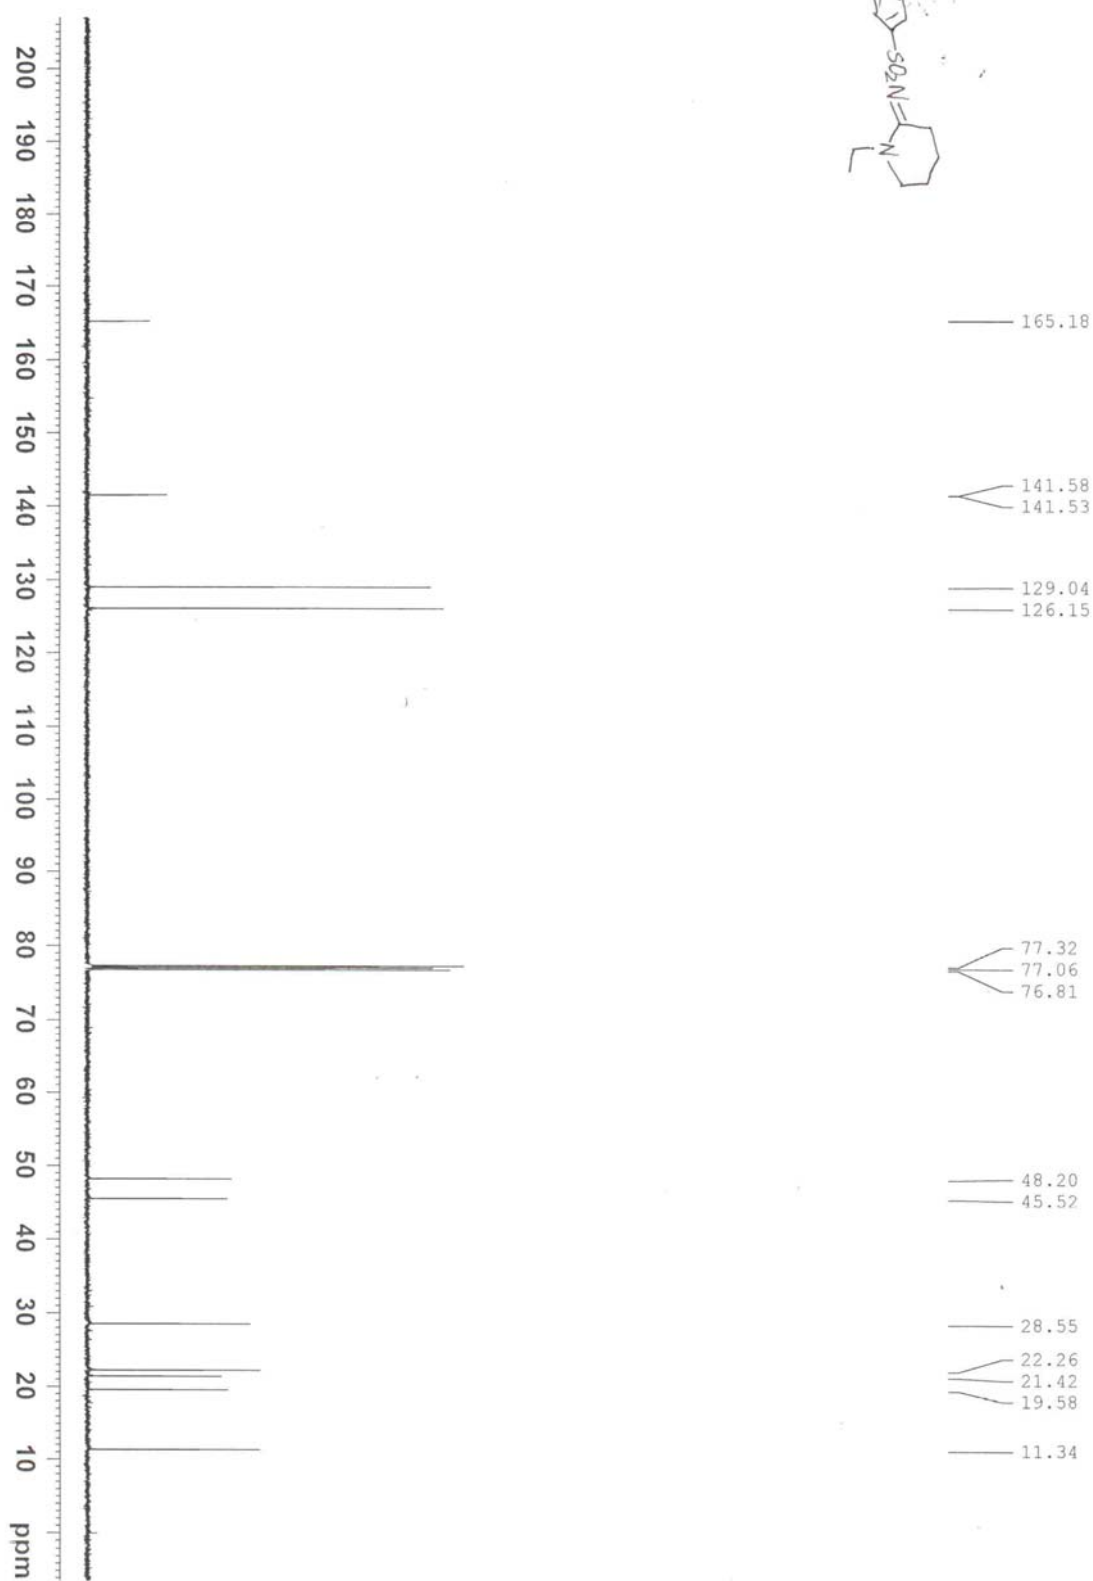

Supplement: Supplementary file 1 [file 4602670]
